# Supplementary material
Source: PubMed Central journal article supplement (PMC6506644)
Supplement: mmc1.pdf [file mmc1.pdf]

**Biophysical Journal, Volume 116**

**Supplemental Information**

**Interfacial Binding Sites for Cholesterol on G Protein-Coupled  
Receptors**

**Anthony G. Lee**

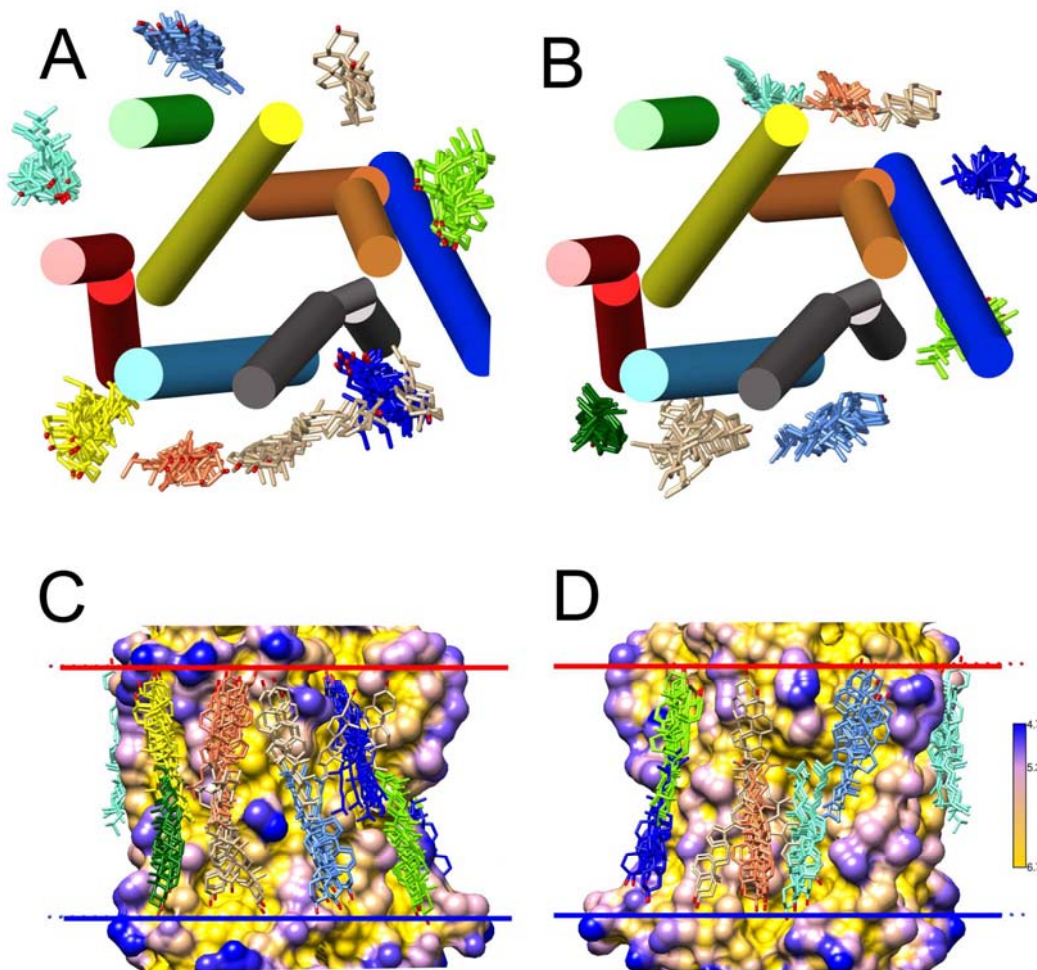

FIGURE S1 Docking to 3D4S with tilted interface planes around the protein. A set of 9 pairs of interface planes were generated by  $5^\circ$  rotations about the Chimera x and z axes. Docking to these structures resulted in the clusters shown in (A) and (B) for the EC and IC monolayers, respectively, coloured as in Fig. 4, and both viewed from the EC side. (C, D) show surface views of 3D4S coloured by distance from a bulk 'solvent' layer calculated using the Depth program (29) with distances ( $\text{\AA}$ ) given by the scale on the right. Clusters are coloured as in Fig. 4.

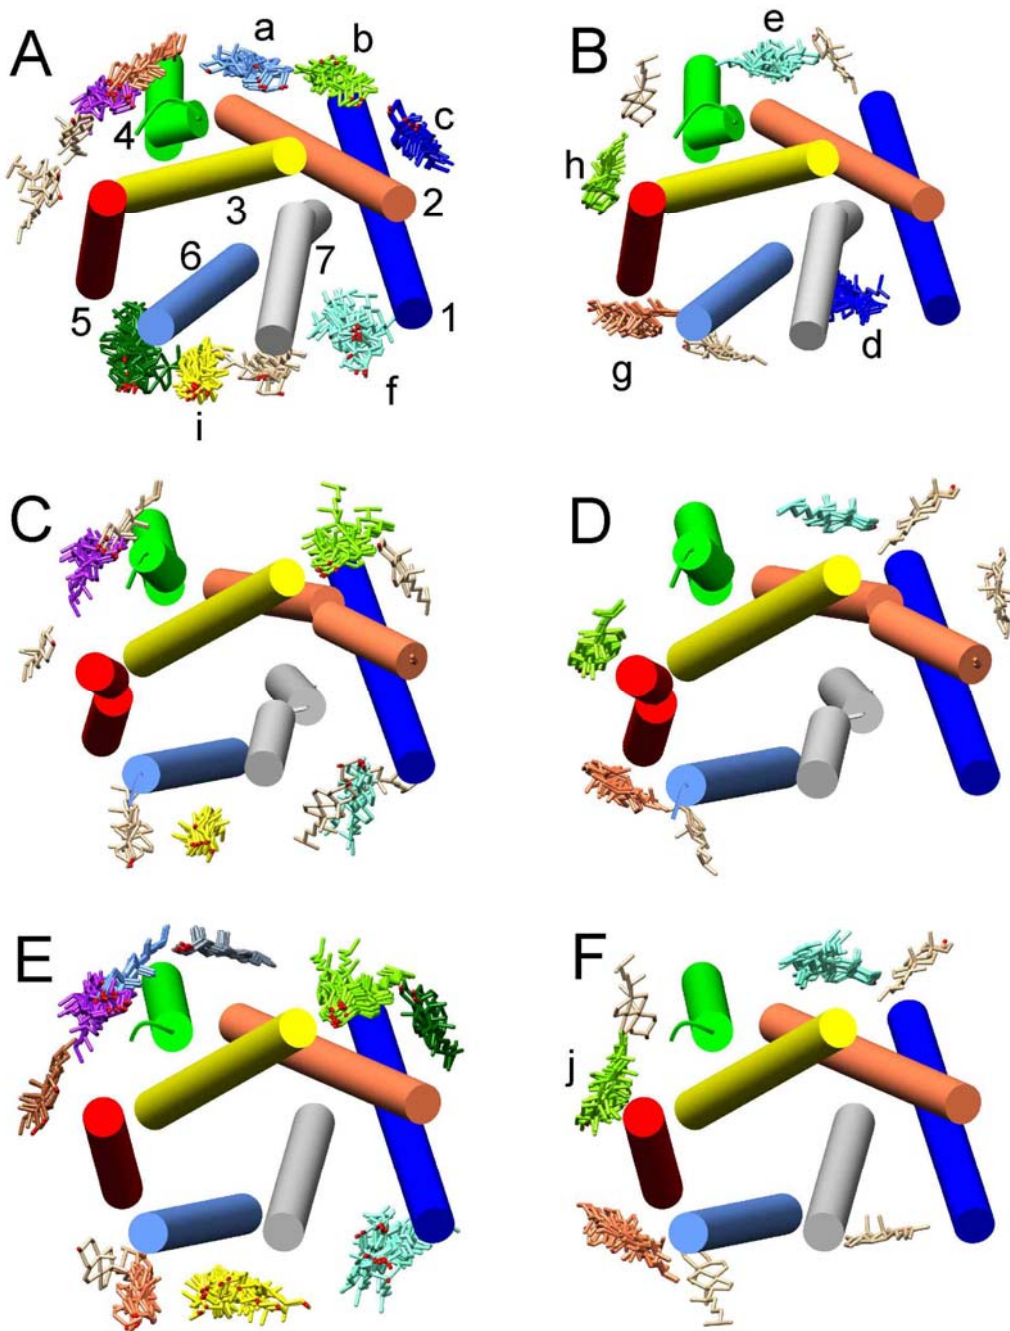

FIGURE S2 Docking to rhodopsin and opsin, all views being from the EC side. Shown are the EC (A, C, E) and IC (B, D, F) monolayers, for the inactive (A, B) and active (C, D) states of rhodopsin and for opsin (E, F). Poses are clustered, with single poses coloured tan. The letters *a-j* relate to clusters identified in Table S6.

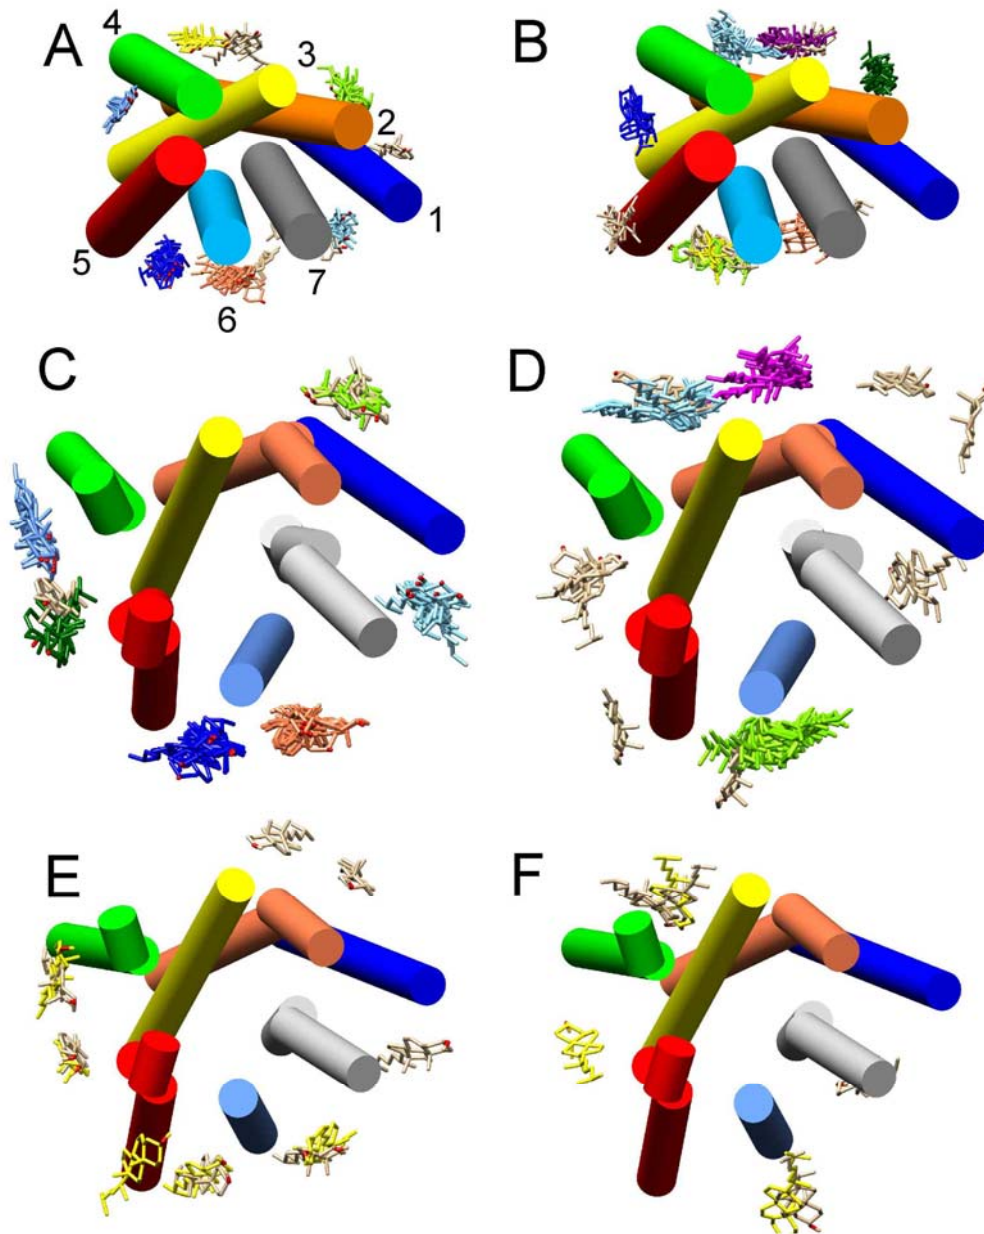

FIGURE S3 Docking to A2A in the inactive, active intermediate, and fully active states, all views being from the EC side. Shown are the EC (A, C, E) and IC (B, D, F) monolayers, for the inactive (A, B), active intermediate (C, D) and active (E, F) states. Only crystallographic structures with no resolved cholesterol molecules are included in this analysis. For the inactive and active intermediate states poses are clustered, with single poses coloured tan. For the active state, poses for the two available structures, 5G53 and 6GDG, are coloured tan and yellow, respectively.

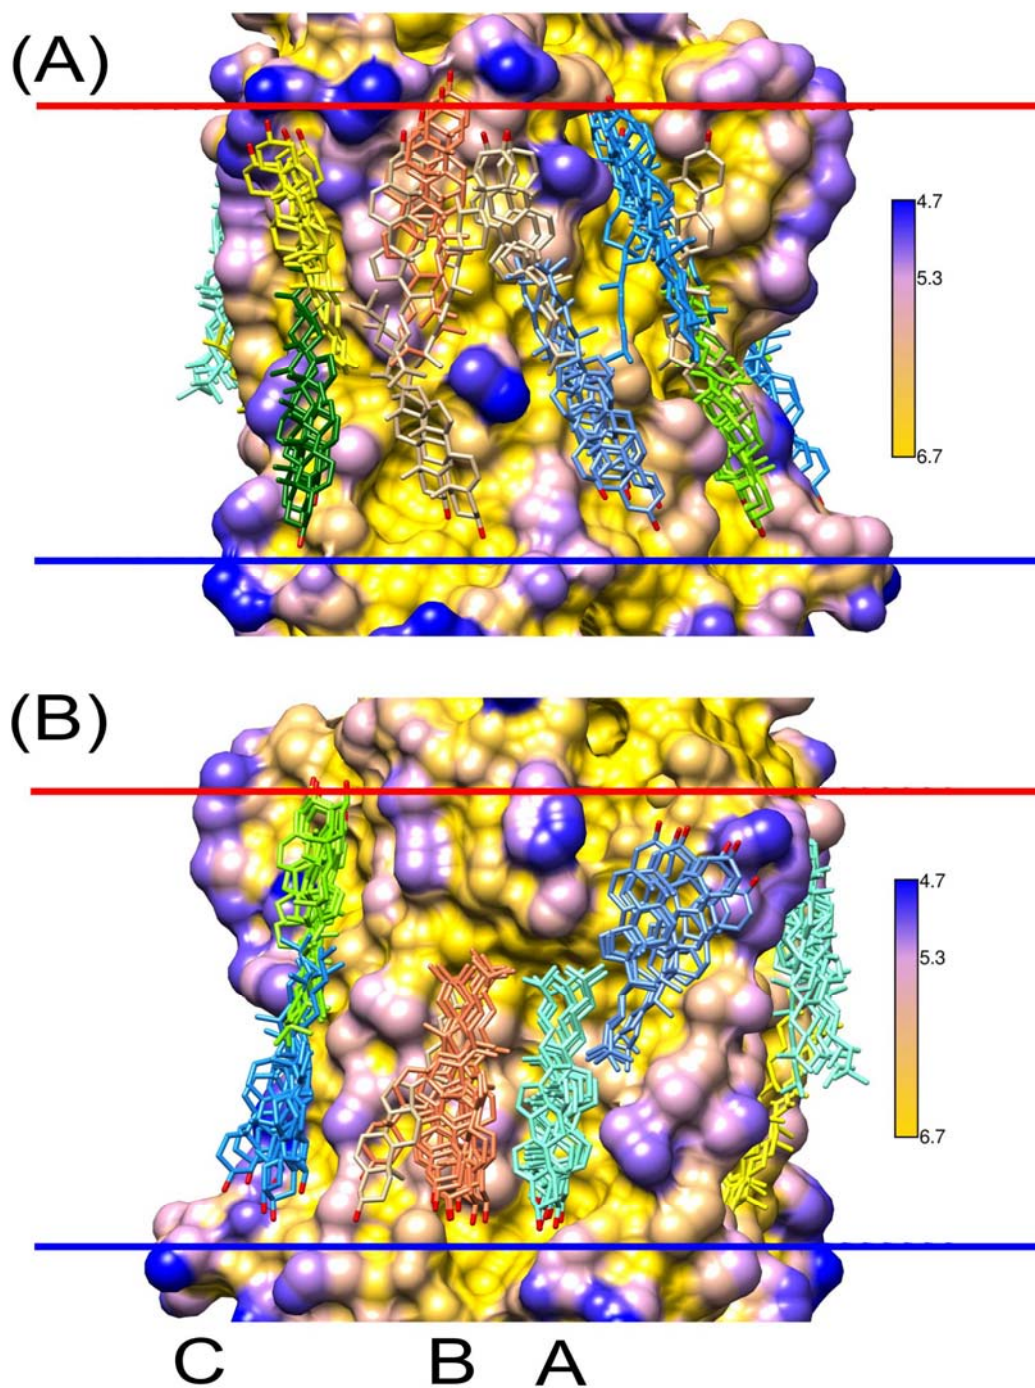

FIGURE S4 Surface view of inactive  $\beta_2$ AR with docking clusters. A and B show two views, related by a 180° rotation, of the surface of 3D4S coloured by distance from a bulk 'solvent' layer calculated using the Depth program (29) with distances (Å) given by the scales on the right. Clusters are shown coloured as in Fig. 4, with the three crystallographic sites A-C marked.

TABLE S1 Cholesterol binding to the A<sub>2A</sub> receptor (EC side)

| PDB  | Binding site <sup>a</sup> |                |                |                |                         |
|------|---------------------------|----------------|----------------|----------------|-------------------------|
|      | A                         | B              | C              | D              | Others                  |
| 5iu4 | CLR2402                   | CLR2403        | <i>CLR2404</i> | <i>CLR2405</i> |                         |
| 4eiy |                           | CLR2403        | <i>CLR2404</i> | <i>CLR2405</i> |                         |
| 5iu7 | CLR2402                   | CLR2403        | <i>CLR2404</i> | <i>CLR2405</i> |                         |
| 5iu8 | CLR2406                   | CLR2403        | <i>CLR2404</i> | <i>CLR2405</i> |                         |
| 5iua | CLR2402                   | CLR2403        | <i>CLR2404</i> | <i>CLR2405</i> |                         |
| 5iub | OLA2416                   | CLR2402        | <i>CLR2403</i> | CLR2404        |                         |
| 5jtb | OLC1221                   | CLR1202        | CLR1203        | <i>CLR1204</i> |                         |
| 5k2a | OLC1226                   | CLR1203        | <i>CLR1204</i> | <i>CLR1205</i> |                         |
| 5k2b | OLC1222                   | <i>CLR1205</i> | <i>CLR1204</i> | <i>CLR1203</i> |                         |
| 5k2c | OLC1207                   | CLR1203        | <i>CLR1204</i> | <i>CLR1205</i> |                         |
| 5k2d | OLC1222                   | CLR1205        | <i>CLR1204</i> | <i>CLR1203</i> |                         |
| 5mzj | OLA2426                   | CLR2402        | <i>CLR2403</i> | <i>CLR2404</i> |                         |
| 5mzp | CLR2402                   | CLR2403        | <i>CLR2404</i> | <i>CLR2405</i> |                         |
| 5nlx |                           | CLR506         |                |                | CLR507/508 <sup>b</sup> |
| 5nm2 |                           | CLR1222        | <i>CLR1223</i> | <i>CLR1224</i> |                         |
| 5nm4 |                           | CLR508         | <i>CLR510</i>  |                | CLR509 <sup>b</sup>     |
| 5n2r | OLA2408                   | CLR2402        | <i>CLR2403</i> | <i>CLR2404</i> |                         |
| 5olg | OLC1228                   | CLR1202        | <i>CLR1203</i> | <i>CLR1204</i> | CLR1205                 |
| 5olh |                           | CLR1204        | <i>CLR1205</i> | <i>CLR1206</i> |                         |
| 5olo |                           | CLR1202        | <i>CLR1203</i> | <i>CLR1204</i> |                         |
| 5olv | CLR1203                   | CLR1204        | <i>CLR1205</i> | <i>CLR1206</i> |                         |
| 5olz | CLR1202                   | CLR1203        | <i>CLR1204</i> | <i>CLR1205</i> |                         |
| 5om1 | CLR1204                   | CLR1205        | <i>CLR1206</i> | <i>CLR1207</i> |                         |
| 5om4 | CLR1203                   | CLR1204        | <i>CLR1205</i> | <i>CLR1206</i> |                         |
| 5uvi |                           | CLR1204        | <i>CLR1203</i> | <i>CLR1202</i> |                         |
| 5vra | OLC2409                   | CLR2405        | <i>CLR2403</i> | <i>CLR2404</i> |                         |
| 6aqf | OLC1216                   | CLR1204        | <i>CLR1202</i> | <i>CLR1203</i> |                         |

<sup>a</sup> The nomenclature for bound cholesterol (CLR) molecules is that given in the respective PDB file. In some structures, as indicated, binding site A is occupied by a molecule of oleic acid (OLA) or 1-oleoyl-*R*-glycerol (OLC). Entries in italics indicate that a docking pose occupies the site as indicated by an rmsd with the crystallographic CLR molecule of 4 Å or less.

<sup>b</sup> These cholesterol molecules make no contact with protein and so are not included in the analysis.

TABLE S2 Cholesterol binding to other GPCRs

| PDB                                            | Binding site <sup>a</sup>                                                                          |                |
|------------------------------------------------|----------------------------------------------------------------------------------------------------|----------------|
|                                                | EC side                                                                                            | IC side        |
| 5-hydroxytryptamine receptor 2B:               |                                                                                                    |                |
| 4ib4                                           |                                                                                                    | <i>CLR2003</i> |
| 4nc3                                           |                                                                                                    | <i>CLR1203</i> |
| 5tvn                                           |                                                                                                    | <i>CLR2002</i> |
| 6drx                                           |                                                                                                    | CLR1202        |
| 6dry                                           |                                                                                                    | CLR2002        |
| 6drz                                           |                                                                                                    | <i>CLR1201</i> |
| 6ds0                                           |                                                                                                    | <i>CLR1201</i> |
| Cannabinoid receptor 1:                        |                                                                                                    |                |
| 5xr8                                           |                                                                                                    | <i>CLR1203</i> |
| 5xra                                           |                                                                                                    | <i>CLR608</i>  |
| C-C chemokine receptor type 9:                 |                                                                                                    |                |
| 5lwe                                           |                                                                                                    | CLR417         |
| Opioid mu receptor:                            |                                                                                                    |                |
| 4dkl                                           | <i>CLR614</i>                                                                                      |                |
| Opioid kappa receptor:                         |                                                                                                    |                |
| 6b73                                           | <i>CLR2002</i>                                                                                     |                |
| P2Y purinoreceptor 12:                         |                                                                                                    |                |
| 4ntj                                           | CLR1202                                                                                            | <i>CLR1203</i> |
| 4pxz                                           |                                                                                                    | <i>CLR1202</i> |
| Metabotropic glutamate receptor (GPCR Class C) |                                                                                                    |                |
| 4or2 (dimer)                                   | CLR1902.A, <i>CLR1903.A</i> , CLR1904.A,<br><i>CLR1905.A</i> , <i>CLR1905.B</i> , <i>CLR1906.B</i> |                |
| Viral GPCR                                     |                                                                                                    |                |
| 4xt1                                           | <i>CLR401</i> , CLR402                                                                             |                |

<sup>a</sup> The nomenclature for bound cholesterol (CLR) molecules is that given in the respective PDB file. Entries in italics indicate that a docking pose occupies the site as indicated by an rmsd with the crystallographic CLR molecule of 4 Å or less.

TABLE S3 Docking of cholesterol on the IC side of the  $\beta_2$ -adrenergic receptor

| E <sup>a</sup>               | Docking site <sup>b</sup> | Local Residues (within 4 Å of a cholesterol molecule)                                             |
|------------------------------|---------------------------|---------------------------------------------------------------------------------------------------|
| 3D4S docking sites:          |                           |                                                                                                   |
| -14.5                        | A                         | Tyr70, Thr73, Ser74, Cys77, Val81, Phe108, Ile112, Leu115, Arg151, Ile154, Leu155, Trp158, Phe166 |
| -13.3                        | C                         | Val44, Leu45, Val48, Phe49, Val52, Leu53, Thr56, Leu339                                           |
| -13.0                        | d                         | Ile43, Ala46, Phe49, Leu53, Val317, Pro323, Leu324, Phe336, Gln337, Leu340                        |
| -13.0                        | B                         | Ile55, Ala59, Thr73, Cys77, Leu80, Val81, Leu84, Ala85                                            |
| 5D5A docking sites:          |                           |                                                                                                   |
| -14.6                        | A                         | Tyr70, Thr73, Ser74, Ile112, Leu115, Arg151, Ile154, Leu155, Trp158, Phe166                       |
| -13.7                        | C                         | Val44, Leu45, Val48, Phe49, Val52, Leu53, Leu339, Leu340                                          |
| -13.1                        | g                         | Tyr209, Val213, Val216, Phe217, Ser220, Gln224, Ile291, Ile294                                    |
| -12.9                        | h                         | Cys125, Val126, Val129, Asp130, Leu145, Ile153, Val206, Val210, Pro211, Ile214                    |
| -12.7                        | f                         | Val216, Tyr219, Phe223, Gly276, Met279, Gly280, Thr283, Leu284, Leu287, Ile291                    |
| -12.7                        | B                         | Ile55, Ala59, Thr73, Cys77, Leu80, Val81, Ala85, Trp105, Phe108, Ile112                           |
| 3D4S crystallographic sites: |                           |                                                                                                   |
|                              | A                         | Tyr70, Thr73, Ser74, Cys77, Val81, Ile112, Leu115, Arg151, Ile154, Trp158                         |
|                              | B                         | Ile55, Ala59, Thr73, Cys77, Leu80, Val81, Leu84, Ala85                                            |
| 5D5A crystallographic sites: |                           |                                                                                                   |
|                              | A                         | Tyr70, Thr73, Ser74, Cys77, Val81, Ile112, Leu115, Arg151, Ile154, Leu155, Trp158                 |
|                              | B                         | Ile55, Ala59, Thr73, Cys77, Leu80, Val81, Leu84, Ala85                                            |
|                              | C                         | Val44, Leu45, Val48, Phe49, Val52, Leu53, Thr56, Leu84, Leu339, Leu340                            |

<sup>a</sup> Docking energy, kcal mol<sup>-1</sup>.

<sup>b</sup> Sites of cholesterol binding observed in X-ray crystal structures (Table 1) are given in capitals and additional docking sites are lower case (see Fig. 4).



TABLE S4 Cholesterol docking to A<sub>2A</sub> receptor structures showing no crystallographic cholesterol molecules (EC side)

| Inactive |                       |                     | Active Intermediate |                       |                     |
|----------|-----------------------|---------------------|---------------------|-----------------------|---------------------|
| PDB      | Pose No. <sup>a</sup> |                     | PDB                 | Pose No. <sup>a</sup> |                     |
|          | Site C <sup>b</sup>   | Site D <sup>b</sup> |                     | Site C <sup>b</sup>   | Site D <sup>b</sup> |
| 3eml     | 4                     | 3                   | 2ydo                | 3                     | 2                   |
| 3pwh     | 2                     | 1                   | 2ydv                | 3                     | 2                   |
| 3rey     | 5                     | 2                   | 3qak                | 1                     | 3                   |
| 3rfm     | -                     | 3                   | 4ug2                | 3                     | 4                   |
| 3uza     | 5                     | 3                   | 4uhr                | 3                     | 2                   |
| 3uzc     | 3                     | 1                   | 5wf5                | 1                     | 5                   |
| 3vg9     | -                     | 5                   | 5wf6                | 3                     | 5                   |
| 5uig     | -                     | 2                   | Active              |                       |                     |
|          |                       |                     | 5g53                | 4                     | 8                   |
|          |                       |                     | 6gdg                | 9                     | 5                   |

<sup>a</sup> Pose number as listed in Table S7.

<sup>b</sup> Sites labelled as in Table S1 and Fig. 7.

TABLE S5 A<sub>2</sub>AR: comparison of MD and docking results for 4EIY

| Site <sup>a</sup> | Local Residues <sup>b</sup>                                         |
|-------------------|---------------------------------------------------------------------|
| EC side:          |                                                                     |
| MD IS1            | V8, Y9, V12, L272                                                   |
| Dock g            | A0, G5, V8, Y9, V12, W268, Y271, L272, V275, T279                   |
| MD IS2            | V57, L58, P61, F62, T65, F70, F79, I80, F83                         |
| Dock f            | V57, L58, P61, F62, T65, F70, A72, G76, I80                         |
| MD h60            | L247, P248, I251, I252, F255, S263, A265, P266,                     |
| Dock C            | I244, P248, I251, I252, F255, S263, H264, A265, L269                |
| IC side:          |                                                                     |
| MD IS3            | I24, F93, L96, A97, I100, Y103, I104, R107, L115, C128, L131, L192, |
| Dock c            | F93, L96, A97, I100, I104, L115, V116, I124, I135                   |
| MD h56i           | L194, F201, K233, A236, I237, G240, A243                            |
| Dock b            | F182, L187, L194, K233, A236, I237, G240, A243, L247                |

<sup>a</sup> MD refers to sites detected by MD simulations (17, 36) and Dock refers to docking poses, as given in Fig. 6.

<sup>b</sup> Residues close to bound cholesterol as reported in the MD simulation papers (17, 36) or within 4 Å of a docking pose (Table S7).

TABLE S6 Comparison of MD and docking results for rhodopsin in the inactive state, and for opsin

| MD Group <sup>a</sup> | Docking Cluster <sup>b</sup> | Residue Numbers <sup>c</sup>                | Ref. <sup>d</sup> |
|-----------------------|------------------------------|---------------------------------------------|-------------------|
| Rhodopsin:            |                              |                                             |                   |
| A1                    | -                            | 53, 56, 57, 60, 320, 321                    | 38                |
| A2                    | d                            | 252, 255, 256, 259, 260, 305,308,309        | 38                |
| A3                    | a                            | 108, <i>111, 112, 115, 172</i>              | 38                |
| B1                    | b, c                         | 96, <i>105,108,112,115</i>                  | 39                |
| B2                    | e                            | 63, 74, <i>154</i>                          | 39                |
| C1                    | d, f                         | 43, 46, 50, 53, 56, 294, 301, 321, 322, 323 | 40                |
| C2                    | g, h                         | 126, 159, 206, 209, 210, 213, 214, 220, 221 | 40                |
| C3                    | i                            | 263                                         | 40                |
| Opsin:                |                              |                                             |                   |
| D1                    | -                            | 50, 53, 54, 56, 318, 321, 322, 323          | 40                |
| D2                    | j                            | 126, 159, 162, 206, 209, 210, 213, 214, 220 | 40                |
| D3                    | -                            | 256, 259, 263                               | 40                |

<sup>a</sup> Groups of residues showing preferential interaction with cholesterol, numbered as in the original references.

<sup>b</sup> Docking clusters, labelled as in Fig. S2.

<sup>c</sup> Residue numbers for residues showing preferential interaction with cholesterol in MD simulations. Residues also within 4 Å of a docking pose in the given cluster or clusters are indicated in italics.

<sup>d</sup> References for MD simulations.

TABLE S7 Interfacial binding sites for cholesterol on GPCRs

| PDB <sup>a</sup>                                                           | E <sup>b</sup> | Local Residues <sup>c</sup>                                                                                                        |
|----------------------------------------------------------------------------|----------------|------------------------------------------------------------------------------------------------------------------------------------|
| GPCR Class A                                                               |                |                                                                                                                                    |
| 5-hydroxytryptamine (Serotonin) receptor                                   |                |                                                                                                                                    |
| 5-Hydroxytryptamine receptor 5HT1B, inactive, Human 4iaq                   |                |                                                                                                                                    |
| 4iaq_EC                                                                    | -13.3          | V175[4.51], S179[4.55], P183[4.59], F186[4.62], H205[5.35], L207[5.37], Y208[5.38], Y211[5.41]                                     |
| 4iaq_IC                                                                    | -14.0          | V74[1.57], Y86[2.41], A89[2.44], S90[2.45], V93[2.48], I170[4.46], A171[4.47], W174[4.50], I178[4.54]                              |
|                                                                            | -13.1          | L145[3.48], Y148[3.51], W149[3.52], F219[5.49], L222[5.52], L223[5.53], A226[5.56], L227[5.57]                                     |
|                                                                            | -12.9          | L145[3.48], W149[3.52], R165[4.41], M169[4.45], L172[4.48], F176[4.52], S179[4.55], Y211[5.41]                                     |
|                                                                            | -12.4          | F217[5.47], Y218[5.48], T221[5.51], I225[5.55], Y228[5.58], Y232[5.62], I324[6.45], L328[6.49]                                     |
| 5-Hydroxytryptamine receptor 5HT1B, inactive, Human 4iar                   |                |                                                                                                                                    |
| 4iar_EC                                                                    | -14.5          | V175[4.51], F176[4.52], S179[4.55], P183[4.59], F186[4.62], H205[5.35], L207[5.37], Y208[5.38], Y211[5.41]                         |
|                                                                            | -12.8          | Y40, I44, L52[1.35], L55[1.38], I59[1.42], H347[7.31], A349[7.33], F353[7.37]                                                      |
| 4iar_IC                                                                    | -14.1          | Y86[2.41], S90[2.45], V93[2.48], L97[2.52], L101[2.56], P163[4.39], A166[4.42], A167[4.43], I170[4.46], A171[4.47], W174[4.50]     |
|                                                                            | -13.3          | T64[1.47], L65[1.48], A68[1.51], F69[1.52], A72[1.55], R76[1.59], L96[2.51], I100[2.55], L383[8.57]                                |
|                                                                            | -13.3          | W138[3.41], L145[3.48], W149[3.52], R165[4.41], M169[4.45], L172[4.48], F176[4.52], Y211[5.41], G215[5.45], F219[5.49]             |
|                                                                            | -12.8          | Y228[5.58], G317[6.38], L320[6.41], G321[6.42], I324[6.45], V325[6.46], L328[6.49], P329[6.50]                                     |
|                                                                            | -13.0          | I71[1.54], Y75[1.58], A89[2.44], V93[2.48], L96[2.51], L97[2.52], I100[2.55], L101[2.56]                                           |
| 5-Hydroxytryptamine receptor 5HT2B, inactive, with cholesterol, Human 4ib4 |                |                                                                                                                                    |
| 4ib4_EC                                                                    | -14.5          | K53, W56[1.34], L59[1.37], L60[1.38], I115[2.65], M336[6.47], E363[7.36], I364[7.37], W367[7.40], I368[7.41], V371[7.44]           |
|                                                                            | -14.2          | I182[4.52], G185[4.55], I186[4.56], P189[4.59], D216[5.37], F217[5.38], F220[5.41], G221[5.42]                                     |
|                                                                            | -12.5          | L102[2.52], V126[3.23], P129[3.26], A130[3.27], F133[3.30], L134[3.31], F138[3.35], P191[4.61]                                     |
|                                                                            | -12.3          | W56[1.34], L59[1.37], L60[1.38], M63[1.41], V64[1.42], M360[7.33], I364[7.37], I368[7.41], V371[7.44]                              |
|                                                                            | -12.2          | F331[6.42], L335[6.46], C338[6.49], P339[6.50], I342[6.53], T343[6.54], L358[7.31], L361[7.34], F365[7.38]                         |
|                                                                            | -12.1          | F227[5.48], L230[5.51], F331[6.42], I342[6.53], I345[6.56], T346[6.57], L349[6.60], C350[6.61]                                     |
|                                                                            | -11.9          | L335[6.46], M336[6.47], P339[6.50], I342[6.53], T346[6.57], C353, L358[7.31], L361[7.34], F365[7.38]                               |
|                                                                            | -11.7          | I61[1.39], I65[1.43], I66[1.44], I69[1.47], P109[2.59], L113[2.63], M116[2.66], F117[2.67], P122, L123                             |
| 4ib4_IC                                                                    | -14.3          | I61[1.39], I65[1.43], I66[1.44], I69[1.47], G70[1.48], T73[1.51], L77[1.55], Y394[8.57], I395[8.58], C397, Y399                    |
|                                                                            | -13.2          | Y91[2.41], S95[2.45], V98[2.48], F133[3.30], L137[3.34], R169[4.39], F173[4.43], I176[4.46], W180[4.50]                            |
|                                                                            | -12.4          | V151[3.48], Y154[3.51], I155[3.52], A231[5.52], I232[5.53], V235[5.56], T236[5.57], L239[5.60]                                     |
|                                                                            | -12.4          | I76[1.54], S80[1.58], M94[2.44], V98[2.48], L101[2.51], L102[2.52], L134[3.31], F138[3.35]                                         |
|                                                                            | -12.3          | L59[1.37], L60[1.38], M63[1.41], V64[1.42], P67[1.45], I368[7.41], V371[7.44], V375[7.48], V379[7.52], L382[7.55]                  |
|                                                                            | -12.3          | W144[3.41], V151[3.48], I155[3.52], T171[4.41], K175[4.45], V178[4.48], I182[4.52], T228[5.49]                                     |
| 5-Hydroxytryptamine receptor 5HT2B, inactive, with cholesterol, Human 4nc3 |                |                                                                                                                                    |
| 4nc3_EC                                                                    | -15.6          | K53, W56[1.34], L59[1.37], L60[1.38], M63[1.41], V64[1.42], I115[2.65], E363[7.36], I364[7.37], W367[7.40], V371[7.44]             |
|                                                                            | -14.8          | V178[4.48], L181[4.51], I182[4.52], G185[4.55], I186[4.56], P189[4.59], K193[4.63], D216[5.37], F217[5.38], F220[5.41], G221[5.42] |
|                                                                            | -13.2          | L102[2.52], P129[3.26], A130[3.27], F133[3.30], L134[3.31], F138[3.35], P191[4.61], I192[4.62]                                     |
|                                                                            | -12.6          | L332[6.43], L335[6.46], C338[6.49], P339[6.50], I342[6.53], T343[6.54], T346[6.57], L358[7.31], L361[7.34], F365[7.38]             |
|                                                                            | -11.7          | F227[5.48], L230[5.51], I234[5.55], F331[6.42], I342[6.53], I345[6.56], T346[6.57], L349[6.60]                                     |
|                                                                            | -12.0          | L219[5.40], L223[5.44], F227[5.48], A231[5.52], I234[5.55], V235[5.56], I345[6.56], L349[6.60]                                     |
| 4nc3_IC                                                                    | -14.6          | Y91[2.41], M94[2.44], S95[2.45], V98[2.48], F133[3.30], L137[3.34], F138[3.35], F173[4.43], I176[4.46], W180[4.50], I184[4.54]     |

| PDB <sup>a</sup>                                                           | E <sup>b</sup> | Local Residues <sup>c</sup>                                                                                                                            |
|----------------------------------------------------------------------------|----------------|--------------------------------------------------------------------------------------------------------------------------------------------------------|
|                                                                            | -12.9          | I61[1.39], I65[1.43], I66[1.44], I69[1.47], G70[1.48], P109[2.59], L112[2.62], Y399                                                                    |
|                                                                            | -12.8          | I76[1.54], S80[1.58], M94[2.44], V98[2.48], L102[2.52], F106[2.56], L134[3.31], F138[3.35]                                                             |
|                                                                            | -12.6          | L59[1.37], L60[1.38], M63[1.41], V64[1.42], V371[7.44], V375[7.48], V379[7.52], L382[7.55]                                                             |
|                                                                            | -12.6          | V151[3.48], Y154[3.51], I155[3.52], A231[5.52], I232[5.53], V235[5.56], T236[5.57], L239[5.60]                                                         |
|                                                                            | -12.7          | W144[3.41], V151[3.48], I155[3.52], K175[4.45], V178[4.48], I182[4.52], A224[5.45], T228[5.49], I232[5.53]                                             |
| 5-Hydroxytryptamine receptor 5HT2B, inactive, with cholesterol, Human 5tvn |                |                                                                                                                                                        |
| 5tvn_EC                                                                    | -15.3          | K53, W56[1.34], L60[1.38], I115[2.65], E118, M336[6.47], E363[7.36], I364[7.37], W367[7.40], I368[7.41], V371[7.44]                                    |
|                                                                            | -13.7          | V178[4.48], L181[4.51], I182[4.52], G185[4.55], I186[4.56], P189[4.59], D216[5.37], F217[5.38], F220[5.41]                                             |
|                                                                            | -13.3          | L335[6.46], P339[6.50], I342[6.53], T343[6.54], T346[6.57], C353, L358[7.31], F365[7.38]                                                               |
|                                                                            | -12.4          | F226[5.47], F227[5.48], L230[5.51], I234[5.55], F331[6.42], C338[6.49], I342[6.53], I345[6.56], T346[6.57], L349[6.60]                                 |
|                                                                            | -12.0          | L219[5.40], F220[5.41], L223[5.44], T228[5.49], A231[5.52], I232[5.53], V235[5.56], L349[6.60]                                                         |
|                                                                            | -11.7          | I61[1.39], I65[1.43], I66[1.44], I69[1.47], P109[2.59], L112[2.62], L113[2.63], M116[2.66], F117[2.67], P122, L123                                     |
| 5tvn_IC                                                                    | -13.6          | I61[1.39], I65[1.43], I66[1.44], I69[1.47], G70[1.48], T73[1.51], L77[1.55], Y399                                                                      |
|                                                                            | -13.4          | Y91[2.41], M94[2.44], S95[2.45], V98[2.48], L102[2.52], F133[3.30], L134[3.31], L137[3.34], F138[3.35], F173[4.43], I176[4.46], W180[4.50], I184[4.54] |
|                                                                            | -12.7          | L60[1.38], M63[1.41], V64[1.42], M336[6.47], W367[7.40], I368[7.41], V371[7.44], V375[7.48], V379[7.52], L382[7.55]                                    |
|                                                                            | -13.5          | I76[1.54], S80[1.58], M94[2.44], V98[2.48], L102[2.52], F106[2.56], L134[3.31], F138[3.35]                                                             |
|                                                                            | -12.5          | W144[3.41], V151[3.48], I155[3.52], Y166, N167, T171[4.41], I174[4.44], K175[4.45], V178[4.48], I182[4.52], T228[5.49], I232[5.53]                     |
|                                                                            | -12.2          | V151[3.48], Y154[3.51], I155[3.52], A231[5.52], I232[5.53], V235[5.56], T236[5.57], L239[5.60]                                                         |
| 5-Hydroxytryptamine receptor 5HT2B, inactive, with cholesterol, Human 6drx |                |                                                                                                                                                        |
| 6drx_EC                                                                    | -16.4          | W56[1.34], L60[1.38], I115[2.65], M360[7.33], E363[7.36], I364[7.37], W367[7.40], V371[7.44]                                                           |
|                                                                            | -14.8          | V178[4.48], I182[4.52], G185[4.55], I186[4.56], P189[4.59], K193[4.63], D216[5.37], F217[5.38], F220[5.41], G221[5.42]                                 |
|                                                                            | -12.6          | L335[6.46], P339[6.50], I342[6.53], T343[6.54], T346[6.57], C353, L358[7.31], L361[7.34], F365[7.38]                                                   |
|                                                                            | -12.4          | L102[2.52], V126[3.23], P129[3.26], A130[3.27], F133[3.30], L134[3.31], F138[3.35], P191[4.61]                                                         |
|                                                                            | -12.0          | F227[5.48], L230[5.51], I234[5.55], F331[6.42], L335[6.46], I342[6.53], I345[6.56], L349[6.60], C350[6.61]                                             |
|                                                                            | -12.2          | L219[5.40], F220[5.41], L223[5.44], F227[5.48], A231[5.52], I234[5.55], V235[5.56], I345[6.56], L349[6.60]                                             |
| 6drx_IC                                                                    | -12.6          | S80[1.58], Y91[2.41], M94[2.44], S95[2.45], L137[3.34], F173[4.43], I176[4.46], W180[4.50], I184[4.54]                                                 |
|                                                                            | -12.3          | W144[3.41], V151[3.48], Y154[3.51], I155[3.52], K158[3.55], T228[5.49], I232[5.53], T236[5.57], L239[5.60]                                             |
|                                                                            | -11.7          | M63[1.41], P67[1.45], V371[7.44], V375[7.48], L378[7.51], L382[7.55], F391[8.54], I395[8.58]                                                           |
|                                                                            | -12.6          | L332[6.43], M336[6.47], I368[7.41], V371[7.44], V375[7.48], V379[7.52], L382[7.55], F383[7.56]                                                         |
|                                                                            | -12.0          | I76[1.54], L77[1.55], S80[1.58], L81[1.59], M94[2.44], V98[2.48], L101[2.51], L102[2.52], F138[3.35]                                                   |
| 5-Hydroxytryptamine receptor 5HT2B, inactive, with cholesterol, Human 6dry |                |                                                                                                                                                        |
| 6dry_EC                                                                    | -15.3          | K53, W56[1.34], L59[1.37], L60[1.38], I115[2.65], M336[6.47], E363[7.36], I364[7.37], W367[7.40], I368[7.41], V371[7.44]                               |
|                                                                            | -13.6          | I182[4.52], G185[4.55], I186[4.56], P189[4.59], D216[5.37], F217[5.38], F220[5.41], G221[5.42], A224[5.45]                                             |
|                                                                            | -13.1          | L102[2.52], P129[3.26], A130[3.27], F133[3.30], L134[3.31], F138[3.35], P191[4.61], I192[4.62]                                                         |
|                                                                            | -12.8          | L335[6.46], P339[6.50], I342[6.53], T343[6.54], T346[6.57], C353, L358[7.31], F365[7.38]                                                               |
|                                                                            | -12.3          | F227[5.48], L230[5.51], I234[5.55], F331[6.42], L335[6.46], I342[6.53], I345[6.56], T346[6.57], L349[6.60]                                             |
| 6dry_IC                                                                    | -14.5          | W144[3.41], A148[3.45], V151[3.48], D152[3.49], I155[3.52], N167, T171[4.41], K175[4.45], V178[4.48], I182[4.52]                                       |
|                                                                            | -13.9          | Y91[2.41], M94[2.44], S95[2.45], V98[2.48], L137[3.34], F138[3.35], F173[4.43], I176[4.46], W180[4.50], I184[4.54]                                     |
|                                                                            | -12.5          | M63[1.41], P67[1.45], M336[6.47], V371[7.44], V375[7.48], L378[7.51], L382[7.55], F391[8.54], I395[8.58]                                               |
|                                                                            | -12.9          | V151[3.48], Y154[3.51], I155[3.52], T228[5.49], A231[5.52], I232[5.53], V235[5.56], T236[5.57]                                                         |
|                                                                            | -12.5          | I76[1.54], L77[1.55], S80[1.58], L81[1.59], M94[2.44], V98[2.48], L101[2.51], L102[2.52], F138[3.35]                                                   |
| 5-Hydroxytryptamine receptor 5HT2B, inactive, with cholesterol, Human 6drz |                |                                                                                                                                                        |

| PDB <sup>a</sup> | E <sup>b</sup> | Local Residues <sup>c</sup>                                                                                                        |
|------------------|----------------|------------------------------------------------------------------------------------------------------------------------------------|
| 6drz_EC          | -14.3          | W56[1.34], L60[1.38], M63[1.41], M336[6.47], I364[7.37], W367[7.40], I368[7.41], V371[7.44]                                        |
|                  | -14.0          | W144[3.41], I182[4.52], I186[4.56], P189[4.59], K193[4.63], D216[5.37], F217[5.38], F220[5.41], G221[5.42], A224[5.45], T228[5.49] |
|                  | -12.9          | L332[6.43], L335[6.46], M336[6.47], C338[6.49], P339[6.50], I342[6.53], T343[6.54], L358[7.31], L361[7.34], F365[7.38]             |
|                  | -12.7          | V126[3.23], P129[3.26], A130[3.27], F133[3.30], L134[3.31], L137[3.34], I188[4.58], P191[4.61]                                     |
|                  | -12.1          | F227[5.48], L230[5.51], I234[5.55], F331[6.42], C338[6.49], I342[6.53], I345[6.56], T346[6.57], L349[6.60]                         |
| 6drz_IC          | -15.6          | I61[1.39], I65[1.43], I66[1.44], I69[1.47], G70[1.48], Y394[8.57], I395[8.58], C397, Y399                                          |
|                  | -14.3          | W144[3.41], A148[3.45], V151[3.48], D152[3.49], I155[3.52], K175[4.45], V178[4.48], I182[4.52]                                     |
|                  | -13.5          | Y91[2.41], M94[2.44], S95[2.45], V98[2.48], L102[2.52], L134[3.31], F173[4.43], I176[4.46]                                         |
|                  | -12.9          | V151[3.48], Y154[3.51], I155[3.52], T228[5.49], A231[5.52], I232[5.53], V235[5.56], T236[5.57], L239[5.60]                         |
|                  | -12.2          | M63[1.41], P67[1.45], L74[1.52], M336[6.47], V371[7.44], V375[7.48], L378[7.51], L382[7.55], F391[8.54], I395[8.58]                |

## 5-Hydroxytryptamine receptor 5HT2B, inactive, with cholesterol, Human 6ds0

|         |       |                                                                                                                                    |
|---------|-------|------------------------------------------------------------------------------------------------------------------------------------|
| 6ds0_EC | -14.2 | K53, W56[1.34], L59[1.37], L60[1.38], M63[1.41], I115[2.65], M360[7.33], E363[7.36], I364[7.37], W367[7.40], V371[7.44]            |
|         | -13.0 | W144[3.41], I182[4.52], G185[4.55], I186[4.56], P189[4.59], K193[4.63], F217[5.38], F220[5.41], A224[5.45], T228[5.49], I232[5.53] |
|         | -12.6 | L102[2.52], V126[3.23], P129[3.26], A130[3.27], F133[3.30], L134[3.31], F138[3.35], P191[4.61]                                     |
|         | -12.2 | L335[6.46], M336[6.47], P339[6.50], I342[6.53], T343[6.54], T346[6.57], C353, F365[7.38]                                           |
| 6ds0_IC | -14.1 | I61[1.39], I65[1.43], I66[1.44], I69[1.47], G70[1.48], T73[1.51], P109[2.59], Y394[8.57], I395[8.58], C397, Y399                   |
|         | -13.3 | Y91[2.41], M94[2.44], S95[2.45], V98[2.48], F133[3.30], L137[3.34], F173[4.43], I176[4.46], W180[4.50], I184[4.54]                 |
|         | -12.4 | T73[1.51], I76[1.54], L77[1.55], S80[1.58], L81[1.59], L101[2.51], L105[2.55], F106[2.56]                                          |
|         | -12.3 | I76[1.54], S80[1.58], M94[2.44], V98[2.48], L101[2.51], L102[2.52], L134[3.31], F138[3.35]                                         |
|         | -12.3 | M63[1.41], P67[1.45], I368[7.41], V371[7.44], V375[7.48], L378[7.51], V379[7.52], L382[7.55]                                       |

## Adenosine A1 receptor

## Adenosine A1 receptor, inactive, Human 5n2s

|         |       |                                                                                                                                                |
|---------|-------|------------------------------------------------------------------------------------------------------------------------------------------------|
| 5n2s_EC | -13.1 | F185[5.43], F186[5.44], L190[5.48], L193[5.51], L248[6.49], I252[6.53], C255[6.56], I256[6.57], F259[6.60]                                     |
|         | -11.9 | I13[1.36], V17[1.40], V24[1.47], A60[2.55], P64[2.59], I67[2.62], L68[2.63], I71[2.66]                                                         |
|         | -12.2 | L57[2.52], L61[2.56], L65[2.60], M82[3.27], V83[3.28], P86[3.31], L90[3.35], W132[4.50], F136[4.54]                                            |
| 5n2s_IC | -13.5 | F185[5.43], L190[5.48], L193[5.51], V197[5.55], Y200[5.58], L201[5.59], F204[5.62], A237[6.38], F241[6.42], A244[6.45], L238[6.39], I252[6.53] |
|         | -13.1 | V53[2.48], L57[2.52], L61[2.56], P86[3.31], A125[4.43], I128[4.46], A129[4.47], W132[4.50], F136[4.54]                                         |

## Adenosine A1 receptor, inactive, residues renumbered, Human 5uen

|         |       |                                                                                                                                                |
|---------|-------|------------------------------------------------------------------------------------------------------------------------------------------------|
| 5uen_EC | -13.4 | L134[4.52], V137[4.55], T141[4.59], F144[4.62], G145[4.63], W146, F183[5.41], W188[5.46]                                                       |
|         | -12.9 | F185[5.43], F186[5.44], L190[5.48], L193[5.51], L194[5.52], V197[5.55], L248[6.49], I252[6.53], C255[6.56], I256[6.57], F259[6.60], C260[6.61] |
|         | -12.2 | V17[1.40], A20[1.43], L21[1.44], V24[1.47], G59[2.54], A60[2.55], P64[2.59], I67[2.62], L68[2.63], I71[2.66]                                   |
| 5uen_IC | -13.5 | F185[5.43], L190[5.48], V197[5.55], F204[5.62], A237[6.38], L240[6.41], F241[6.42], A244[6.45], L248[6.49]                                     |
|         | -13.4 | I15[1.38], I19[1.42], L238[6.39], L242[6.43], F275[7.40], M283[7.48], I286[7.51], V287[7.52], F290[7.55], R291[7.56]                           |
|         | -12.8 | G14[1.37], V17[1.40], L18[1.41], L21[1.44], W303[8.58], F307[8.62], R308[8.63], C309[8.64]                                                     |
|         | -12.5 | S50[2.45], V53[2.48], L61[2.56], A125[4.43], I128[4.46], A129[4.47], W132[4.50], F136[4.54]                                                    |

## Adenosine A2A receptor

## A2A active state no cholesterol

## A2A adenosine receptor, active state, with agonist and G protein, Human 5g53

|         |       |                                                                                                                 |
|---------|-------|-----------------------------------------------------------------------------------------------------------------|
| 5g53_EC | -13.6 | S6[1.32], V8[1.34], Y9[1.35], V12[1.38], W268[7.33], Y271[7.36], L272[7.37], V275[7.40], L276[7.41], T279[7.44] |
|         | -12.6 | I10[1.36], L14[1.40], V18[1.44], P61[2.59], I64[2.62], T65[2.63], T68[2.66], F70                                |

| PDB <sup>a</sup>                                                             | E <sup>b</sup> | Local Residues <sup>c</sup>                                                                                                        |
|------------------------------------------------------------------------------|----------------|------------------------------------------------------------------------------------------------------------------------------------|
|                                                                              | -12.4          | A243[6.45], L244[6.46], P248[6.50], I251[6.53], I252[6.54], F255[6.57], P266[7.31], L269[7.34]                                     |
|                                                                              | -12.4          | I127[4.48], V130[4.51], L131[4.52], A134[4.55], T138[4.59], L141[4.62], W143, F180[5.41]                                           |
|                                                                              | -12.3          | L131[4.52], W143, Y179[5.40], F180[5.41], F183[5.44], A184[5.45], V188[5.49], L192[5.53]                                           |
|                                                                              | -12.1          | V57[2.55], L58[2.56], F62[2.60], T65[2.63], F70, A72, G76[3.24], I80[3.28]                                                         |
|                                                                              | -12.0          | F182[5.43], L190[5.51], L191[5.52], L194[5.55], L247[6.49], I251[6.53], C254[6.56], F255[6.57], F258[6.60]                         |
| 5g53_IC                                                                      | -13.5          | Y43[2.41], V46[2.44], S47[2.45], K122[4.43], I125[4.46], A126[4.47], W129[4.50], V130[4.51], F133[4.54]                            |
|                                                                              | -13.5          | Y43[2.41], V46[2.44], S47[2.45], A50[2.48], L58[2.56], F83[3.31], K122[4.43], I125[4.46], W129[4.50], F133[4.54]                   |
|                                                                              | -12.7          | V229[6.31], K233[6.35], A236[6.38], I237[6.39], G240[6.42], A243[6.45], L244[6.46], L247[6.49], P248[6.50]                         |
|                                                                              | -12.7          | V12[1.38], L241[6.43], L272[7.37], V275[7.40], L276[7.41], T279[7.44], V282[7.47], V283[7.48], F286[7.51], I287[7.52]              |
| A2A adenosine receptor, active state, with agonist and G protein, Human 6gdg |                |                                                                                                                                    |
| 6gdg_EC                                                                      | -13.3          | F182[5.43], L187[5.48], L191[5.52], L194[5.55], I251[6.53], C254[6.56], F255[6.57], F258[6.60]                                     |
|                                                                              | -13.1          | I127[4.48], L131[4.52], A134[4.55], I135[4.56], T138[4.59], L141[4.62], G142[4.63], F180[5.41]                                     |
|                                                                              | -12.1          | L131[4.52], W143, Y179[5.40], F180[5.41], F183[5.44], A184[5.45], V188[5.49], L192[5.53]                                           |
|                                                                              | -12.8          | V178[5.39], Y179[5.40], F182[5.43], F183[5.44], L187[5.48], L191[5.52], C254[6.56], F257[6.59], F258[6.60]                         |
|                                                                              | -12.1          | L244[6.46], P248[6.50], I251[6.53], I252[6.54], F255[6.57], A265, L269[7.34], L272[7.37]                                           |
| 6gdg_IC                                                                      | -13.4          | Y43[2.41], V46[2.44], S47[2.45], A50[2.48], K122[4.43], I125[4.46], W129[4.50], F133[4.54]                                         |
|                                                                              | -13.1          | V229[6.31], A232[6.34], K233[6.35], A236[6.38], G240[6.42], A243[6.45], L244[6.46], L247[6.49], P248[6.50]                         |
|                                                                              | -12.7          | L96[3.44], I100[3.48], I104[3.52], L115, V116, I124[4.45], F183[5.44], A184[5.45], V188[5.49]                                      |
| A2A active intermediate state no cholesterol                                 |                |                                                                                                                                    |
| A2A adenosine receptor, active intermediate state, with agonist, Human 2ydo  |                |                                                                                                                                    |
| 2ydo_EC                                                                      | -14.4          | V8[1.34], Y9[1.35], V12[1.38], W268[7.33], Y271[7.36], L272[7.37], V275[7.40], L276[7.41], T279[7.44]                              |
|                                                                              | -12.7          | F182[5.43], L187[5.48], L190[5.51], L191[5.52], L194[5.55], L247[6.49], I251[6.53], C254[6.56], F255[6.57], F258[6.60], C259[6.61] |
|                                                                              | -12.5          | A243[6.45], L244[6.46], L247[6.49], P248[6.50], I251[6.53], I252[6.54], P266[7.31], W268[7.33], L269[7.34]                         |
|                                                                              | -12.7          | L14[1.40], V18[1.44], I21[1.47], P61[2.59], F62[2.60], I64[2.62], A65[2.63], F70                                                   |
|                                                                              | -12.0          | I127[4.48], V130[4.51], L131[4.52], A134[4.55], T138[4.59], L141[4.62], W143, F180[5.41]                                           |
|                                                                              | -12.7          | F93[3.41], L131[4.52], I135[4.56], Y179[5.40], F180[5.41], F183[5.44], A184[5.45], V188[5.49], P189[5.50]                          |
| 2ydo_IC                                                                      | -13.7          | Y43[2.41], V46[2.44], S47[2.45], K122[4.43], I125[4.46], A126[4.47], W129[4.50], F133[4.54]                                        |
|                                                                              | -13.5          | L194[5.55], Y197[5.58], G240[6.42], A243[6.45], L244[6.46], L247[6.49], P248[6.50], I251[6.53]                                     |
|                                                                              | -12.9          | F182[5.43], L187[5.48], L190[5.51], L194[5.55], Y197[5.58], A236[6.38], V239[6.41], G240[6.42], A243[6.45], L247[6.49]             |
| A2A adenosine receptor, active intermediate state, with agonist, Human 2ydv  |                |                                                                                                                                    |
| 2ydv_EC                                                                      | -13.9          | S6[1.32], V8[1.34], Y9[1.35], V12[1.38], W268[7.33], Y271[7.36], L272[7.37], V275[7.40]                                            |
|                                                                              | -12.5          | F182[5.43], L187[5.48], L190[5.51], L191[5.52], L194[5.55], L247[6.49], I251[6.53], C254[6.56], F255[6.57], F258[6.60], C259[6.61] |
|                                                                              | -12.5          | A243[6.45], L244[6.46], L247[6.49], P248[6.50], I251[6.53], I252[6.54], F255[6.57], A265, P266[7.31], L269[7.34]                   |
|                                                                              | -12.2          | I127[4.48], V130[4.51], L131[4.52], A134[4.55], T138[4.59], L141[4.62], W143, F180[5.41]                                           |
|                                                                              | -12.9          | L131[4.52], W143, Y179[5.40], F180[5.41], F183[5.44], A184[5.45], V188[5.49], L192[5.53]                                           |
| 2ydv_IC                                                                      | -13.7          | L194[5.55], Y197[5.58], A236[6.38], G240[6.42], A243[6.45], L244[6.46], L247[6.49], P248[6.50], I251[6.53]                         |
|                                                                              | -13.3          | V25[1.51], C28[1.54], W29[1.55], W32[1.58], A50[2.48], I53[2.51], L54[2.52], V57[2.55], L58[2.56]                                  |
|                                                                              | -13.3          | Y43[2.41], V46[2.44], S47[2.45], K122[4.43], I125[4.46], A126[4.47], W129[4.50], F133[4.54]                                        |
|                                                                              | -13.0          | F182[5.43], L187[5.48], L190[5.51], L194[5.55], Y197[5.58], V239[6.41], A243[6.45], L247[6.49]                                     |
|                                                                              | -12.7          | V18[1.44], I21[1.47], L22[1.48], V25[1.51], W29[1.55], V57[2.55], I302[8.57], H306[8.61]                                           |
| A2A adenosine receptor, active intermediate state, with agonist, Human 3qak  |                |                                                                                                                                    |
| 3qak_EC                                                                      | -13.7          | A243[6.45], L244[6.46], L247[6.49], P248[6.50], I251[6.53], I252[6.54], F255[6.57], H264, A265, L269[7.34]                         |

| PDB <sup>a</sup>                                                            | E <sup>b</sup> | Local Residues <sup>c</sup>                                                                                                     |
|-----------------------------------------------------------------------------|----------------|---------------------------------------------------------------------------------------------------------------------------------|
| 3qak_IC                                                                     | -12.9          | V8[1.34], Y9[1.35], V12[1.38], L267[7.32], W268[7.33], Y271[7.36], L272[7.37], V275[7.40]                                       |
|                                                                             | -12.5          | F183[5.44], L187[5.48], L191[5.52], I251[6.53], C254[6.56], F255[6.57], F258[6.60], C259[6.61]                                  |
|                                                                             | -13.2          | C28[1.54], V31[1.57], W32[1.58], V46[2.44], A50[2.48], I53[2.51], V57[2.55], L58[2.56]                                          |
|                                                                             | -12.8          | Y43[2.41], S47[2.45], A50[2.48], L58[2.56], F83[3.31], L87[3.35], K122[4.43], I125[4.46], W129[4.50], F133[4.54]                |
|                                                                             | -12.7          | L194[5.55], Y197[5.58], A236[6.38], G240[6.42], A243[6.45], L244[6.46], L247[6.49], P248[6.50], I251[6.53]                      |
|                                                                             | -12.6          | F93[3.41], L96[3.44], A97[3.45], I100[3.48], I104[3.52], I124[4.45], I127[4.48], L131[4.52], I135[4.56], F180[5.41], A184[5.45] |
| A2A adenosine receptor, active intermediate state, with agonist, Human 4ug2 |                |                                                                                                                                 |
| 4ug2_EC                                                                     | -13.8          | S6[1.32], V8[1.34], Y9[1.35], V12[1.38], W268[7.33], Y271[7.36], L272[7.37], V275[7.40]                                         |
|                                                                             | -12.8          | L131[4.52], W143, Y179[5.40], F180[5.41], F183[5.44], A184[5.45], V188[5.49], L192[5.53]                                        |
|                                                                             | -12.7          | G240[6.42], A243[6.45], L244[6.46], L247[6.49], P248[6.50], I251[6.53], I252[6.54], F255[6.57], L269[7.34]                      |
|                                                                             | -12.3          | F182[5.43], L187[5.48], L190[5.51], L191[5.52], L194[5.55], L247[6.49], I251[6.53], C254[6.56], F255[6.57], F258[6.60]          |
|                                                                             | -12.1          | I127[4.48], V130[4.51], L131[4.52], A134[4.55], T138[4.59], L141[4.62], W143, F180[5.41]                                        |
| 4ug2_IC                                                                     | -13.2          | V25[1.51], C28[1.54], W29[1.55], W32[1.58], I53[2.51], L54[2.52], V57[2.55], L58[2.56]                                          |
|                                                                             | -13.1          | Y197[5.58], F201[5.62], A236[6.38], V239[6.41], G240[6.42], A243[6.45], L244[6.46], L247[6.49], P248[6.50], I251[6.53]          |
|                                                                             | -12.7          | Y43[2.41], L54[2.52], L58[2.56], F83[3.31], L87[3.35], K122[4.43], W129[4.50], F133[4.54]                                       |
|                                                                             | -12.5          | F183[5.44], L187[5.48], V188[5.49], L191[5.52], L192[5.53], G195[5.56], L198[5.59], R199[5.60]                                  |
|                                                                             | -12.4          | L96[3.44], I100[3.48], R120[4.41], I124[4.45], F183[5.44], A184[5.45], V188[5.49], L192[5.53]                                   |
|                                                                             | -12.2          | V12[1.38], A15[1.41], I16[1.42], L19[1.45], V282[7.47], V283[7.48], F286[7.51], I287[7.52], Y290[7.55]                          |
|                                                                             | -12.8          | L194[5.55], Y197[5.58], L198[5.59], F201[5.62], L202[5.63], R205[5.66], L247[6.49], I251[6.53]                                  |
| A2A adenosine receptor, active intermediate state, with agonist, Human 4uhr |                |                                                                                                                                 |
| 4uhr_EC                                                                     | -13.5          | S6[1.32], V8[1.34], Y9[1.35], V12[1.38], W268[7.33], Y271[7.36], L272[7.37], V275[7.40]                                         |
|                                                                             | -13.1          | F182[5.43], L187[5.48], L190[5.51], L194[5.55], L247[6.49], I251[6.53], C254[6.56], F255[6.57], F258[6.60], C259[6.61]          |
|                                                                             | -12.8          | G240[6.42], A243[6.45], L244[6.46], L247[6.49], P248[6.50], I251[6.53], I252[6.54], F255[6.57], A265, L269[7.34]                |
|                                                                             | -12.6          | L14[1.40], V18[1.44], I21[1.47], V57[2.55], P61[2.59], F62[2.60], A65[2.63], I80[3.28]                                          |
|                                                                             | -12.7          | L96[3.44], L131[4.52], W143, F180[5.41], F183[5.44], A184[5.45], V188[5.49], L192[5.53]                                         |
|                                                                             | -11.8          | I127[4.48], V130[4.51], L131[4.52], A134[4.55], T138[4.59], L141[4.62], W143, F180[5.41]                                        |
| 4uhr_IC                                                                     | -13.7          | T11[1.37], L14[1.40], A15[1.41], V18[1.44], L22[1.48], H306[8.61], V307[8.62], Q310[8.65]                                       |
|                                                                             | -13.4          | Y197[5.58], A236[6.38], G240[6.42], A243[6.45], L244[6.46], L247[6.49], P248[6.50], I251[6.53]                                  |
|                                                                             | -13.4          | V25[1.51], C28[1.54], W29[1.55], W32[1.58], A50[2.48], I53[2.51], L54[2.52], V57[2.55], L58[2.56]                               |
|                                                                             | -13.1          | Y43[2.41], V46[2.44], A50[2.48], L54[2.52], F83[3.31], I125[4.46], W129[4.50], F133[4.54]                                       |
| A2A adenosine receptor, active intermediate state, with agonist, Human 5wf5 |                |                                                                                                                                 |
| 5wf5_EC                                                                     | -13.9          | A243[6.45], L244[6.46], L247[6.49], P248[6.50], I251[6.53], I252[6.54], F255[6.57], S263, H264, A265, L269[7.34]                |
|                                                                             | -13.5          | G5[1.31], V8[1.34], Y9[1.35], V12[1.38], L267[7.32], W268[7.33], Y271[7.36], L272[7.37], V275[7.40]                             |
|                                                                             | -12.3          | L14[1.40], A17[1.43], V18[1.44], I21[1.47], L22[1.48], V57[2.55], P61[2.59], I64[2.62]                                          |
|                                                                             | -12.3          | I127[4.48], V130[4.51], L131[4.52], A134[4.55], T138[4.59], L141[4.62], W143, F180[5.41]                                        |
|                                                                             | -12.3          | F182[5.43], L187[5.48], L190[5.51], L247[6.49], I251[6.53], C254[6.56], F255[6.57], F258[6.60], C259[6.61]                      |
| 5wf5_IC                                                                     | -13.3          | F93[3.41], L96[3.44], A97[3.45], I100[3.48], I124[4.45], L131[4.52], I135[4.56], F180[5.41]                                     |
|                                                                             | -13.0          | L194[5.55], Y197[5.58], A236[6.38], V239[6.41], G240[6.42], A243[6.45], L244[6.46], L247[6.49], P248[6.50], I251[6.53]          |
|                                                                             | -13.0          | Y43[2.41], V46[2.44], S47[2.45], A50[2.48], K122[4.43], I125[4.46], W129[4.50], F133[4.54]                                      |
|                                                                             | -12.7          | V25[1.51], C28[1.54], W29[1.55], W32[1.58], A50[2.48], I53[2.51], A54[2.52], L58[2.56], F83[3.31]                               |
|                                                                             | -12.4          | V12[1.38], I16[1.42], L19[1.45], L272[7.37], V275[7.40], T279[7.44], V282[7.47], V283[7.48], F286[7.51], I287[7.52], Y290[7.55] |
| A2A adenosine receptor, active intermediate state, with agonist, Human 5wf6 |                |                                                                                                                                 |



| PDB <sup>a</sup> | E <sup>b</sup> | Local Residues <sup>c</sup>                                                                                                  |
|------------------|----------------|------------------------------------------------------------------------------------------------------------------------------|
| Swf6_EC          | -13.5          | G5[1.31], S6[1.32], V8[1.34], Y9[1.35], V12[1.38], W268[7.33], Y271[7.36], L272[7.37], V275[7.40]                            |
|                  | -12.6          | L14[1.40], A17[1.43], V18[1.44], I21[1.47], L22[1.48], G56[2.54], V57[2.55], I60[2.58], P61[2.59], I64[2.62], T65[2.63]      |
|                  | -12.5          | G240[6.42], A243[6.45], L244[6.46], L247[6.49], P248[6.50], I251[6.53], I252[6.54], F255[6.57], A265, P266[7.31], L269[7.34] |
|                  | -12.1          | I127[4.48], V130[4.51], L131[4.52], A134[4.55], T138[4.59], L141[4.62], W143, F180[5.41]                                     |
|                  | -11.9          | F182[5.43], L187[5.48], L190[5.51], L191[5.52], I251[6.53], C254[6.56], F255[6.57], F258[6.60]                               |
| Swf6_IC          | -14.0          | Y43[2.41], V46[2.44], S47[2.45], K122[4.43], I125[4.46], A126[4.47], W129[4.50], V130[4.51], F133[4.54]                      |
|                  | -13.7          | L194[5.55], Y197[5.58], A236[6.38], V239[6.41], G240[6.42], A243[6.45], L244[6.46], L247[6.49], P248[6.50], I251[6.53]       |
|                  | -13.7          | C28[1.54], W29[1.55], W32[1.58], V46[2.44], A50[2.48], I53[2.51], A54[2.52], L58[2.56], L87[3.35], F133[4.54]                |
|                  | -13.6          | Y43[2.41], V46[2.44], S47[2.45], A50[2.48], L58[2.56], F83[3.31], L87[3.35], K122[4.43], I125[4.46], W129[4.50], F133[4.54]  |
|                  | -13.0          | F182[5.43], L190[5.51], L194[5.55], Y197[5.58], A236[6.38], V239[6.41], G240[6.42], A243[6.45], L247[6.49], I251[6.53]       |

## A2A inactive state no cholesterol

## A2A adenosine receptor, inactive state, Human 3eml

|         |                                                                                                                  |                                                                                                                                                |
|---------|------------------------------------------------------------------------------------------------------------------|------------------------------------------------------------------------------------------------------------------------------------------------|
| 3eml_EC | -14.2                                                                                                            | L14[1.40], A17[1.43], I21[1.47], L22[1.48], I60[2.58], P61[2.59], I64[2.62], T65[2.63]                                                         |
|         | -14.2                                                                                                            | G5[1.31], S6[1.32], V8[1.34], Y9[1.35], V12[1.38], Y271[7.36], L272[7.37], V275[7.40]                                                          |
|         | -12.8                                                                                                            | F182[5.43], F183[5.44], L187[5.48], L190[5.51], L191[5.52], L194[5.55], A243[6.45], L247[6.49], I251[6.53], C254[6.56], F255[6.57], F258[6.60] |
|         | -12.9                                                                                                            | G240[6.42], A243[6.45], L244[6.46], L247[6.49], P248[6.50], I251[6.53], I252[6.54], F255[6.57], L269[7.34]                                     |
| 3eml_IC | -12.1                                                                                                            | F93[3.41], L131[4.52], A134[4.55], I135[4.56], T138[4.59], L141[4.62], W143, F180[5.41]                                                        |
|         | -13.9                                                                                                            | F201[5.62], K233[6.35], A236[6.38], I237[6.39], G240[6.42], L244[6.46], L247[6.49], I251[6.53]                                                 |
|         | -13.4                                                                                                            | Y43[2.41], V46[2.44], K122[4.43], I125[4.46], A126[4.47], W129[4.50], V130[4.51], F133[4.54]                                                   |
|         | -13.3                                                                                                            | I237[6.39], L241[6.43], T279[7.44], V283[7.48], F286[7.51], I287[7.52], Y290[7.55], R291[7.56]                                                 |
| -13.2   | V46[2.44], S47[2.45], A50[2.48], A54[2.52], L58[2.56], F83[3.31], K122[4.43], I125[4.46], W129[4.50], F133[4.54] |                                                                                                                                                |

## A2A adenosine receptor, inactive state, Human 3pwh

|         |                                                                                                               |                                                                                                                                                |
|---------|---------------------------------------------------------------------------------------------------------------|------------------------------------------------------------------------------------------------------------------------------------------------|
| 3pwh_EC | -13.1                                                                                                         | F182[5.43], F183[5.44], L187[5.48], L190[5.51], L191[5.52], L194[5.55], L247[6.49], I251[6.53], C254[6.56], F255[6.57], F258[6.60], C259[6.61] |
|         | -13.0                                                                                                         | L244[6.46], L247[6.49], P248[6.50], I251[6.53], I252[6.54], F255[6.57], A265, L269[7.34]                                                       |
|         | -12.3                                                                                                         | H75[3.23], F79[3.27], A126[4.47], W129[4.50], V130[4.51], F133[4.54], L137[4.58], M140[4.61]                                                   |
|         | -12.2                                                                                                         | S7[1.33], I10[1.36], T11[1.37], L14[1.40], A15[1.41], V18[1.44], L19[1.45], L22[1.48]                                                          |
| 3pwh_IC | -14.5                                                                                                         | L194[5.55], Y197[5.58], L198[5.59], F201[5.62], A236[6.38], G240[6.42], A243[6.45], L244[6.46], L247[6.49], P248[6.50]                         |
|         | -13.0                                                                                                         | Y43[2.41], V46[2.44], A122[4.43], I125[4.46], A126[4.47], W129[4.50], V130[4.51], F133[4.54]                                                   |
|         | -12.6                                                                                                         | L187[5.48], L194[5.55], K233[6.35], A236[6.38], I237[6.39], G240[6.42], A243[6.45], L247[6.49]                                                 |
|         | -13.6                                                                                                         | C28[1.54], W32[1.58], V46[2.44], A50[2.48], I53[2.51], L54[2.52], V57[2.55], L58[2.56]                                                         |
|         | -13.1                                                                                                         | I21[1.47], L22[1.48], V25[1.51], L26[1.52], W29[1.55], V57[2.55], I302[8.57], I303[8.58], S305[8.60]                                           |
| -12.5   | F93[3.41], L96[3.44], A97[3.45], I100[3.48], I104[3.52], V116, I124[4.45], A184[5.45], C185[5.46], V188[5.49] |                                                                                                                                                |
| -12.4   | Y103[3.51], V188[5.49], L191[5.52], L192[5.53], G195[5.56], V196[5.57], L198[5.59], R199[5.60]                |                                                                                                                                                |

## A2A adenosine receptor, inactive state, Human 3rey

|         |       |                                                                                                            |
|---------|-------|------------------------------------------------------------------------------------------------------------|
| 3rey_EC | -15.0 | L14[1.40], A17[1.43], V18[1.44], L22[1.48], P61[2.59], F62[2.60], I64[2.62], T65[2.63]                     |
|         | -13.2 | F182[5.43], F183[5.44], L187[5.48], L194[5.55], C254[6.56], F255[6.57], F258[6.60], C259[6.61]             |
|         | -12.8 | H75[3.23], F79[3.27], A126[4.47], W129[4.50], V130[4.51], F133[4.54], L137[4.58], M140[4.61]               |
|         | -12.3 | F93[3.41], L131[4.52], A134[4.55], I135[4.56], T138[4.59], L141[4.62], W143, F180[5.41]                    |
| 3rey_IC | -12.2 | L244[6.46], P248[6.50], I251[6.53], I252[6.54], F255[6.57], A265, L269[7.34], L272[7.37], L276[7.41]       |
|         | -13.4 | I21[1.47], L22[1.48], V25[1.51], L26[1.52], W29[1.55], V57[2.55], I302[8.57], I303[8.58]                   |
|         | -13.4 | V31[1.57], Y43[2.41], V46[2.44], A122[4.43], I125[4.46], A126[4.47], W129[4.50], V130[4.51], F133[4.54]    |
|         | -13.0 | L187[5.48], L194[5.55], K233[6.35], A236[6.38], I237[6.39], G240[6.42], A243[6.45], L247[6.49]             |
|         | -12.9 | I237[6.39], L241[6.43], V275[7.40], T279[7.44], V283[7.48], F286[7.51], I287[7.52], Y290[7.55], R291[7.56] |

| PDB <sup>a</sup>                                   | E <sup>b</sup> | Local Residues <sup>c</sup>                                                                                                                    |
|----------------------------------------------------|----------------|------------------------------------------------------------------------------------------------------------------------------------------------|
|                                                    | -12.3          | F93[3.41], L96[3.44], I100[3.48], I104[3.52], I124[4.45], I135[4.56], A184[5.45], C185[5.46]                                                   |
| A2A adenosine receptor, inactive state, Human 3rfm |                |                                                                                                                                                |
| 3rfm_EC                                            | -14.6          | L14[1.40], A17[1.43], I21[1.47], L22[1.48], G56[2.54], P61[2.59], I64[2.62], T65[2.63]                                                         |
|                                                    | -14.2          | H75[3.23], A126[4.47], W129[4.50], V130[4.51], F133[4.54], L137[4.58], M140[4.61], L141[4.62]                                                  |
|                                                    | -13.2          | F182[5.43], F183[5.44], L187[5.48], L194[5.55], L247[6.49], I251[6.53], C254[6.56], F255[6.57], F258[6.60], C259[6.61]                         |
| 3rfm_EC                                            | -14.6          | I21[1.47], L22[1.48], V25[1.51], L26[1.52], W29[1.55], V57[2.55], I302[8.57], I303[8.58], R304[8.59], S305[8.60]                               |
|                                                    | -14.0          | L194[5.55], Y197[5.58], L198[5.59], F201[5.62], A236[6.38], G240[6.42], L244[6.46], L247[6.49]                                                 |
|                                                    | -13.0          | Y43[2.41], V46[2.44], S47[2.45], A122[4.43], I125[4.46], A126[4.47], W129[4.50], F133[4.54]                                                    |
|                                                    | -14.0          | C28[1.54], V31[1.57], W32[1.58], V46[2.44], A50[2.48], L54[2.52], L58[2.56], F83[3.31], F133[4.54]                                             |
| A2A adenosine receptor, inactive state, Human 3uza |                |                                                                                                                                                |
| 3uza_EC                                            | -14.4          | L14[1.40], A17[1.43], V18[1.44], I21[1.47], L22[1.48], P61[2.59], I64[2.62], T65[2.63]                                                         |
|                                                    | -14.2          | Y9[1.35], V12[1.38], W268[7.33], Y271[7.36], L272[7.37], V275[7.40], L276[7.41], T279[7.44], V283[7.48]                                        |
|                                                    | -13.3          | F182[5.43], F183[5.44], L187[5.48], L190[5.51], L191[5.52], L194[5.55], A243[6.45], L247[6.49], I251[6.53], C254[6.56], F255[6.57], F258[6.60] |
|                                                    | -13.2          | H75[3.23], A126[4.47], W129[4.50], V130[4.51], F133[4.54], L137[4.58], M140[4.61], L141[4.62]                                                  |
|                                                    | -12.2          | L244[6.46], P248[6.50], I251[6.53], I252[6.54], F255[6.57], L269[7.34], L272[7.37], L276[7.41]                                                 |
|                                                    | -12.0          | F93[3.41], L131[4.52], A134[4.55], I135[4.56], T138[4.59], L141[4.62], W143, F180[5.41]                                                        |
| 3uza_IC                                            | -14.0          | I21[1.47], L22[1.48], V25[1.51], L26[1.52], W29[1.55], V57[2.55], I302[8.57], I303[8.58], S305[8.60]                                           |
|                                                    | -13.3          | L194[5.55], Y197[5.58], L198[5.59], F201[5.62], A236[6.38], G240[6.42], A243[6.45], L244[6.46], L247[6.49], P248[6.50]                         |
|                                                    | -13.2          | V31[1.57], Y43[2.41], V46[2.44], A122[4.43], I125[4.46], A126[4.47], W129[4.50], V130[4.51], F133[4.54]                                        |
|                                                    | -13.1          | V25[1.51], C28[1.54], W29[1.55], W32[1.58], L33[1.59], I53[2.51], L54[2.52], V57[2.55], L58[2.56]                                              |
| A2A adenosine receptor, inactive state, Human 3uzc |                |                                                                                                                                                |
| 3uzc_EC                                            | -12.6          | F183[5.44], L187[5.48], L191[5.52], L247[6.49], I251[6.53], C254[6.56], F255[6.57], F258[6.60], C259[6.61]                                     |
|                                                    | -14.3          | L14[1.40], A17[1.43], V18[1.44], I21[1.47], L22[1.48], P61[2.59], I64[2.62], T65[2.63]                                                         |
|                                                    | -12.3          | L244[6.46], P248[6.50], I251[6.53], I252[6.54], F255[6.57], S263, A265, P266[7.31], L269[7.34]                                                 |
|                                                    | -12.2          | F93[3.41], L131[4.52], A134[4.55], I135[4.56], T138[4.59], L141[4.62], W143, F180[5.41]                                                        |
|                                                    | -12.1          | S47[2.45], A50[2.48], L54[2.52], L58[2.56], F79[3.27], F83[3.31], W129[4.50], F133[4.54]                                                       |
| 3uzc_IC                                            | -14.3          | L241[6.43], L272[7.37], L276[7.41], T279[7.44], V283[7.48], F286[7.51], I287[7.52], Y290[7.55], R291[7.56]                                     |
|                                                    | -13.6          | F183[5.44], A184[5.45], V188[5.49], L191[5.52], L192[5.53], G195[5.56], L198[5.59], R199[5.60]                                                 |
|                                                    | -13.5          | F182[5.43], F183[5.44], L187[5.48], L190[5.51], L191[5.52], L194[5.55], A236[6.38], G240[6.42], A243[6.45], L247[6.49]                         |
|                                                    | -13.5          | I21[1.47], L22[1.48], V25[1.51], L26[1.52], W29[1.55], I302[8.57], I303[8.58], S305[8.60]                                                      |
|                                                    | -13.5          | V31[1.57], Y43[2.41], V46[2.44], A122[4.43], I125[4.46], A126[4.47], W129[4.50], V130[4.51], F133[4.54]                                        |
|                                                    | -12.6          | C28[1.54], W29[1.55], V31[1.57], W32[1.58], V46[2.44], A50[2.48], L54[2.52], V57[2.55], L58[2.56]                                              |
| A2A adenosine receptor, inactive state, Human 3vg9 |                |                                                                                                                                                |
| 3vg9_EC                                            | -14.3          | S6[1.32], V8[1.34], Y9[1.35], V12[1.38], L267[7.32], W268[7.33], Y271[7.36], L272[7.37], V275[7.40]                                            |
|                                                    | -12.7          | L14[1.40], A17[1.43], I21[1.47], V57[2.55], I60[2.58], P61[2.59], I64[2.62], T65[2.63]                                                         |
|                                                    | -12.3          | F182[5.43], F183[5.44], L187[5.48], L190[5.51], L191[5.52], L194[5.55], L247[6.49], I251[6.53], C254[6.56], F255[6.57], F258[6.60]             |
|                                                    | -12.1          | A50[2.48], I53[2.51], A54[2.52], V57[2.55], L58[2.56], F79[3.27], F83[3.31], F133[4.54], M140[4.61]                                            |
| 3vg9_IC                                            | -13.9          | Y43[2.41], V46[2.44], A50[2.48], L58[2.56], F83[3.31], K122[4.43], I125[4.46], W129[4.50], F133[4.54]                                          |
|                                                    | -13.7          | V25[1.51], C28[1.54], W29[1.55], W32[1.58], A50[2.48], I53[2.51], A54[2.52], L58[2.56], F83[3.31], F133[4.54]                                  |
|                                                    | -13.2          | F93[3.41], L96[3.44], I100[3.48], R120[4.41], I124[4.45], I127[4.48], C128[4.49], L131[4.52], I135[4.56], F180[5.41], C185[5.46]               |
|                                                    | -13.2          | L190[5.51], L194[5.55], F201[5.62], A236[6.38], V239[6.41], G240[6.42], A243[6.45], L247[6.49], I251[6.53]                                     |

| PDB <sup>a</sup>                                                     | E <sup>b</sup> | Local Residues <sup>c</sup>                                                                                                        |
|----------------------------------------------------------------------|----------------|------------------------------------------------------------------------------------------------------------------------------------|
| A2A adenosine receptor, inactive state, Human 3vga                   |                |                                                                                                                                    |
| 3vga_EC                                                              | -12.7          | I10[1.36], L14[1.40], I21[1.47], V25[1.51], G56[2.54], V57[2.55], P61[2.59], I64[2.62]                                             |
|                                                                      | -12.4          | F182[5.43], F183[5.44], L187[5.48], L191[5.52], L194[5.55], A243[6.45], L247[6.49], I251[6.53], C254[6.56], F258[6.60]             |
|                                                                      | -12.4          | G240[6.42], A243[6.45], L244[6.46], L247[6.49], P248[6.50], I251[6.53], I252[6.54], L269[7.34]                                     |
|                                                                      | -12.1          | L241[6.43], L244[6.46], C245[6.47], W268[7.33], L272[7.37], V275[7.40], L276[7.41], T279[7.44], V283[7.48]                         |
|                                                                      | -12.2          | F93[3.41], L131[4.52], A134[4.55], I135[4.56], T138[4.59], L141[4.62], W143, F180[5.41]                                            |
| 3vga_IC                                                              | -15.4          | F201[5.62], K233[6.35], A236[6.38], I237[6.39], G240[6.42], L241[6.43], A243[6.45], L244[6.46], L247[6.49], P248[6.50], I251[6.53] |
|                                                                      | -14.0          | Y43[2.41], V46[2.44], S47[2.45], A50[2.48], A54[2.52], L58[2.56], F83[3.31], K122[4.43], I125[4.46], W129[4.50], F133[4.54]        |
|                                                                      | -13.1          | I237[6.39], L241[6.43], L244[6.46], V275[7.40], L276[7.41], T279[7.44], V283[7.48], I287[7.52], Y290[7.55]                         |
|                                                                      | -13.1          | V12[1.38], I16[1.42], V275[7.40], T279[7.44], V282[7.47], V283[7.48], F286[7.51], Y290[7.55]                                       |
|                                                                      | -12.9          | C28[1.54], V31[1.57], W32[1.58], V46[2.44], A50[2.48], I53[2.51], V57[2.55], L58[2.56]                                             |
| A2A adenosine receptor, inactive state, Human 5uig                   |                |                                                                                                                                    |
| 5uig_EC                                                              | -13.5          | G5[1.31], S6[1.32], V8[1.34], Y9[1.35], V12[1.38], Y271[7.36], L272[7.37], V275[7.40]                                              |
|                                                                      | -12.7          | F182[5.43], F183[5.44], L187[5.48], L191[5.52], L194[5.55], L247[6.49], I251[6.53], C254[6.56], F255[6.57], F258[6.60]             |
| 5uig_IC                                                              | -14.8          | N42[2.40], Y43[2.41], F44[2.42], V46[2.44], S47[2.45], K122[4.43], I125[4.46], A126[4.47], W129[4.50], F133[4.54]                  |
|                                                                      | -14.4          | L241[6.43], L244[6.46], L272[7.37], L276[7.41], T279[7.44], V283[7.48], F286[7.51], I287[7.52], Y290[7.55]                         |
|                                                                      | -13.4          | V25[1.51], C28[1.54], W29[1.55], A50[2.48], I53[2.51], A54[2.52], L58[2.56], F79[3.27], F83[3.31], F133[4.54]                      |
|                                                                      | -12.5          | F93[3.41], L96[3.44], I100[3.48], I104[3.52], I124[4.45], I127[4.48], L131[4.52], I135[4.56], F180[5.41], C185[5.46]               |
| A2A inactive state with cholesterol                                  |                |                                                                                                                                    |
| A2A adenosine receptor, inactive state, with cholesterol, Human 4eiy |                |                                                                                                                                    |
| 4eiy_EC                                                              | -14.3          | A0, G5[1.31], V8[1.34], Y9[1.35], V12[1.38], W268[7.33], Y271[7.36], L272[7.37], V275[7.40], T279[7.44]                            |
|                                                                      | -13.4          | F182[5.43], F183[5.44], L187[5.48], L247[6.49], I251[6.53], C254[6.56], F255[6.57], F258[6.60], C259[6.61]                         |
|                                                                      | -12.4          | L244[6.46], P248[6.50], I251[6.53], I252[6.54], F255[6.57], S263, H264, A265, L269[7.34]                                           |
|                                                                      | -12.3          | I10[1.36], L14[1.40], V18[1.44], I21[1.47], P61[2.59], I64[2.62], T65[2.63], T68[2.66]                                             |
|                                                                      | -12.0          | V57[2.55], L58[2.56], P61[2.59], F62[2.60], T65[2.63], F70, A72, G76[3.24], I80[3.28]                                              |
| 4eiy_IC                                                              | -14.1          | Y43[2.41], V46[2.44], S47[2.45], K122[4.43], I125[4.46], A126[4.47], W129[4.50], F133[4.54]                                        |
|                                                                      | -13.5          | K233[6.35], A236[6.38], I237[6.39], G240[6.42], L244[6.46], L247[6.49], P248[6.50], I251[6.53]                                     |
|                                                                      | -13.2          | F93[3.41], L96[3.44], A97[3.45], I100[3.48], I104[3.52], L115, V116, I124[4.45], I135[4.56]                                        |
|                                                                      | -13.0          | F182[5.43], L187[5.48], L194[5.55], K233[6.35], A236[6.38], I237[6.39], G240[6.42], A243[6.45], L247[6.49]                         |
|                                                                      | -12.7          | V12[1.38], L241[6.43], L272[7.37], V275[7.40], L276[7.41], T279[7.44], V283[7.48], F286[7.51], I287[7.52]                          |
|                                                                      | -13.3          | C28[1.54], V46[2.44], A50[2.48], I53[2.51], A54[2.52], L58[2.56], F79[3.27], F83[3.31], F133[4.54]                                 |
|                                                                      | -12.5          | L96[3.44], I100[3.48], Y103[3.51], I104[3.52], A184[5.45], V188[5.49], P189[5.50], L192[5.53]                                      |
| A2A adenosine receptor, inactive state, with cholesterol, Human 5iu4 |                |                                                                                                                                    |
| 5iu4_EC                                                              | -14.4          | G5[1.31], V8[1.34], Y9[1.35], V12[1.38], W268[7.33], Y271[7.36], L272[7.37], V275[7.40], T279[7.44]                                |
|                                                                      | -14.3          | I251[6.53], I252[6.54], F255[6.57], S263, H264, A265, P266[7.31], L269[7.34]                                                       |
|                                                                      | -13.2          | F182[5.43], F183[5.44], L187[5.48], L191[5.52], L247[6.49], I251[6.53], C254[6.56], F255[6.57], F258[6.60], C259[6.61]             |
|                                                                      | -12.9          | V57[2.55], L58[2.56], F62[2.60], T65[2.63], F70, A72, G76[3.24], C77[3.25], F79[3.27], I80[3.28]                                   |
| 5iu4_IC                                                              | -14.6          | F93[3.41], L96[3.44], A97[3.45], I100[3.48], I104[3.52], L115, V116, T117[4.38], R120[4.41], I124[4.45], P189[5.50]                |
|                                                                      | -13.9          | Y43[2.41], V46[2.44], S47[2.45], A50[2.48], L54[2.52], F83[3.31], A122[4.43], I125[4.46], W129[4.50], F133[4.54]                   |
|                                                                      | -13.3          | L187[5.48], L191[5.52], L194[5.55], F201[5.62], K233[6.35], A236[6.38], I237[6.39], G240[6.42], A243[6.45], L247[6.49]             |
| A2A adenosine receptor, inactive state, with cholesterol, Human 5iu7 |                |                                                                                                                                    |
| 5iu7_EC                                                              | -14.1          | A0, G5[1.31], V8[1.34], V12[1.38], W268[7.33], Y271[7.36], L272[7.37], V275[7.40], T279[7.44]                                      |

| PDB <sup>a</sup>                                                     | E <sup>b</sup> | Local Residues <sup>c</sup>                                                                                                        |
|----------------------------------------------------------------------|----------------|------------------------------------------------------------------------------------------------------------------------------------|
|                                                                      | -13.6          | I251[6.53], I252[6.54], F255[6.57], C262, S263, H264, A265, L269[7.34]                                                             |
|                                                                      | -12.9          | F182[5.43], F183[5.44], L187[5.48], L191[5.52], I251[6.53], C254[6.56], F255[6.57], F258[6.60], C259[6.61]                         |
|                                                                      | -12.0          | I21[1.47], V57[2.55], L58[2.56], P61[2.59], F62[2.60], T65[2.63], F70, I80[3.28]                                                   |
|                                                                      | -12.7          | F93[3.41], L131[4.52], A134[4.55], I135[4.56], T138[4.59], L141[4.62], W143, F180[5.41]                                            |
|                                                                      | -12.5          | V57[2.55], L58[2.56], F62[2.60], H75[3.23], G76[3.24], F79[3.27], I80[3.28], M140[4.61]                                            |
|                                                                      | -12.2          | F93[3.41], L96[3.44], F180[5.41], A184[5.45], C185[5.46], V188[5.49], P189[5.50], L192[5.53]                                       |
| Siu7_IC                                                              | -14.8          | C28[1.54], V31[1.57], W32[1.58], V46[2.44], A50[2.48], I125[4.46], W129[4.50], V130[4.51], F133[4.54]                              |
|                                                                      | -13.4          | F201[5.62], K233[6.35], A236[6.38], I237[6.39], G240[6.42], L244[6.46], L247[6.49], P248[6.50], I251[6.53]                         |
|                                                                      | -13.2          | F93[3.41], L96[3.44], A97[3.45], I100[3.48], I104[3.52], L115, V116, T117[4.38], I124[4.45], I135[4.56]                            |
|                                                                      | -12.7          | L14[1.40], A17[1.43], V18[1.44], I21[1.47], L22[1.48], G56[2.54], H306[8.61], V307[8.62]                                           |
|                                                                      | -12.7          | L96[3.44], I100[3.48], Y103[3.51], I104[3.52], I108[3.56], L115, V188[5.49], L192[5.53]                                            |
|                                                                      | -12.6          | I237[6.39], L241[6.43], L272[7.37], V275[7.40], L276[7.41], T279[7.44], V283[7.48], I287[7.52], R291[7.56]                         |
| A2A adenosine receptor, inactive state, with cholesterol, Human Siu8 |                |                                                                                                                                    |
| Siu8_EC                                                              | -14.8          | L244[6.46], L247[6.49], P248[6.50], I251[6.53], I252[6.54], F255[6.57], C262, S263, A265, L269[7.34]                               |
|                                                                      | -14.7          | A0, P2[1.28], G5[1.31], V8[1.34], Y9[1.35], V12[1.38], I16[1.42], L267[7.32], W268[7.33], Y271[7.36], L272[7.37], V275[7.40]       |
|                                                                      | -13.4          | F182[5.43], L187[5.48], L247[6.49], I251[6.53], C254[6.56], F255[6.57], F258[6.60], C259[6.61]                                     |
| Siu8_IC                                                              | -14.8          | C28[1.54], V31[1.57], W32[1.58], V46[2.44], A50[2.48], I125[4.46], W129[4.50], V130[4.51], F133[4.54]                              |
|                                                                      | -13.6          | F93[3.41], L96[3.44], A97[3.45], I100[3.48], I104[3.52], L115, V116, I124[4.45], I135[4.56], C185[5.46]                            |
|                                                                      | -13.2          | F182[5.43], L187[5.48], L191[5.52], L194[5.55], F201[5.62], K233[6.35], A236[6.38], I237[6.39], G240[6.42], A243[6.45], L247[6.49] |
|                                                                      | -13.0          | V25[1.51], C28[1.54], W29[1.55], W32[1.58], A50[2.48], I53[2.51], L54[2.52], L58[2.56], F83[3.31]                                  |
| A2A adenosine receptor, inactive state, with cholesterol, Human Siua |                |                                                                                                                                    |
| Siua_EC                                                              | -14.4          | A0, G5[1.31], V8[1.34], V12[1.38], L267[7.32], W268[7.33], Y271[7.36], L272[7.37], V275[7.40], T279[7.44]                          |
|                                                                      | -14.2          | I251[6.53], I252[6.54], F255[6.57], C262, S263, H264, A265, L269[7.34]                                                             |
|                                                                      | -13.1          | F182[5.43], F183[5.44], L187[5.48], L191[5.52], L247[6.49], I251[6.53], C254[6.56], F255[6.57], F258[6.60], C259[6.61]             |
|                                                                      | -12.7          | V57[2.55], L58[2.56], F62[2.60], F70, A72, G76[3.24], C77[3.25], F79[3.27], I80[3.28]                                              |
|                                                                      | -12.1          | L14[1.40], I21[1.47], V57[2.55], P61[2.59], I64[2.62], T65[2.63], T68[2.66], F70                                                   |
|                                                                      | -12.1          | F79[3.27], A126[4.47], W129[4.50], V130[4.51], F133[4.54], L137[4.58], M140[4.61], L141[4.62]                                      |
| Siua_IC                                                              | -13.9          | F201[5.62], K233[6.35], A236[6.38], I237[6.39], G240[6.42], L244[6.46], L247[6.49], P248[6.50], I251[6.53]                         |
|                                                                      | -13.6          | Y43[2.41], V46[2.44], S47[2.45], A50[2.48], L54[2.52], L58[2.56], F83[3.31], A122[4.43], I125[4.46], W129[4.50], F133[4.54]        |
|                                                                      | -13.4          | F93[3.41], L96[3.44], A97[3.45], I100[3.48], I104[3.52], L115, V116, I124[4.45], I135[4.56], C185[5.46]                            |
|                                                                      | -13.3          | C28[1.54], W29[1.55], W32[1.58], V46[2.44], A50[2.48], L54[2.52], L58[2.56], F83[3.31], F133[4.54]                                 |
|                                                                      | -12.3          | I237[6.39], L241[6.43], L244[6.46], L272[7.37], V275[7.40], L276[7.41], T279[7.44], V283[7.48], I287[7.52], R291[7.56]             |
| A2A adenosine receptor, inactive state, with cholesterol, Human Siub |                |                                                                                                                                    |
| Siub_EC                                                              | -14.8          | I251[6.53], I252[6.54], F255[6.57], T256[6.58], S263, H264, A265, L269[7.34]                                                       |
|                                                                      | -14.7          | A0, G5[1.31], V8[1.34], V12[1.38], L267[7.32], W268[7.33], Y271[7.36], L272[7.37], V275[7.40], T279[7.44]                          |
|                                                                      | -13.2          | F182[5.43], F183[5.44], L187[5.48], L191[5.52], I251[6.53], C254[6.56], F255[6.57], F258[6.60], C259[6.61]                         |
|                                                                      | -12.4          | I21[1.47], V57[2.55], L58[2.56], P61[2.59], F62[2.60], T65[2.63], F70, I80[3.28]                                                   |
|                                                                      | -12.7          | L14[1.40], V18[1.44], I21[1.47], P61[2.59], I64[2.62], T65[2.63], T68[2.66], F70                                                   |
| Siub_IC                                                              | -14.9          | F93[3.41], L96[3.44], A97[3.45], I100[3.48], I104[3.52], L115, V116, I124[4.45]                                                    |
|                                                                      | -14.0          | C28[1.54], W29[1.55], V31[1.57], W32[1.58], V46[2.44], I125[4.46], W129[4.50], V130[4.51], F133[4.54]                              |
|                                                                      | -13.9          | F201[5.62], K233[6.35], A236[6.38], I237[6.39], G240[6.42], L244[6.46], L247[6.49], P248[6.50], I251[6.53]                         |
|                                                                      | -13.4          | V25[1.51], C28[1.54], W29[1.55], W32[1.58], I53[2.51], L54[2.52], V57[2.55], L58[2.56]                                             |
|                                                                      | -12.7          | I237[6.39], L241[6.43], L244[6.46], L272[7.37], V275[7.40], L276[7.41], T279[7.44], V283[7.48], I287[7.52], R291[7.56]             |

| PDB <sup>a</sup>                                                     | E <sup>b</sup> | Local Residues <sup>c</sup>                                                                                                                                |
|----------------------------------------------------------------------|----------------|------------------------------------------------------------------------------------------------------------------------------------------------------------|
|                                                                      | -12.7          | L96[3.44], I100[3.48], Y103[3.51], I104[3.52], I108[3.56], L115, V188[5.49], L192[5.53], V196[5.57]                                                        |
| A2A adenosine receptor, inactive state, with cholesterol, Human 5jtb |                |                                                                                                                                                            |
| 5jtb_EC                                                              | -14.3          | A0, G5[1.31], V8[1.34], Y9[1.35], V12[1.38], W268[7.33], Y271[7.36], L272[7.37], V275[7.40], T279[7.44]                                                    |
|                                                                      | -13.5          | F182[5.43], F183[5.44], L187[5.48], L191[5.52], L194[5.55], L247[6.49], I251[6.53], C254[6.56], F255[6.57], F258[6.60], C259[6.61]                         |
|                                                                      | -13.3          | V57[2.55], L58[2.56], F62[2.60], T65[2.63], F70, A72, A73[3.21], G76[3.24], C77[3.25], I80[3.28]                                                           |
|                                                                      | -12.5          | L14[1.40], A17[1.43], V18[1.44], I21[1.47], V57[2.55], P61[2.59], I64[2.62], T65[2.63], T68[2.66], F70                                                     |
| 5jtb_IC                                                              | -13.3          | Y43[2.41], V46[2.44], S47[2.45], A50[2.48], L58[2.56], F79[3.27], F83[3.31], I125[4.46], W129[4.50], F133[4.54]                                            |
|                                                                      | -13.0          | F182[5.43], L187[5.48], L190[5.51], L194[5.55], Y197[5.58], F201[5.62], K233[6.35], A236[6.38], V239[6.41], G240[6.42], A243[6.45], L247[6.49], I251[6.53] |
|                                                                      | -12.6          | V25[1.51], A50[2.48], I53[2.51], A54[2.52], L58[2.56], F79[3.27], F83[3.31], F133[4.54]                                                                    |
|                                                                      | -12.4          | F93[3.41], L96[3.44], I100[3.48], I104[3.52], I124[4.45], L131[4.52], I135[4.56], A184[5.45], C185[5.46]                                                   |
|                                                                      | -12.3          | V12[1.38], L272[7.37], V275[7.40], L276[7.41], T279[7.44], V283[7.48], F286[7.51], Y290[7.55]                                                              |
| A2A adenosine receptor, inactive state, with cholesterol, Human 5k2a |                |                                                                                                                                                            |
| 5k2a_EC                                                              | -15.1          | A0, P2[1.28], G5[1.31], V8[1.34], Y9[1.35], V12[1.38], L267[7.32], W268[7.33], Y271[7.36], L272[7.37], V275[7.40]                                          |
|                                                                      | -13.4          | F182[5.43], F183[5.44], L187[5.48], L191[5.52], L194[5.55], I251[6.53], C254[6.56], F255[6.57], F258[6.60], C259[6.61]                                     |
|                                                                      | -12.9          | L244[6.46], L247[6.49], P248[6.50], I251[6.53], I252[6.54], A265, P266[7.31], L269[7.34]                                                                   |
|                                                                      | -12.7          | I10[1.36], L14[1.40], A17[1.43], V57[2.55], P61[2.59], I64[2.62], T65[2.63], T68[2.66], F70                                                                |
|                                                                      | -12.6          | V57[2.55], L58[2.56], P61[2.59], F62[2.60], T65[2.63], F70, A72, A73[3.21], G76[3.24], C77[3.25], I80[3.28]                                                |
|                                                                      | -12.5          | A73[3.21], H75[3.23], G76[3.24], F79[3.27], V130[4.51], F133[4.54], L137[4.58], M140[4.61]                                                                 |
|                                                                      | -12.4          | F93[3.41], L131[4.52], A134[4.55], I135[4.56], T138[4.59], L141[4.62], W143, F180[5.41]                                                                    |
| 5k2a_IC                                                              | -14.4          | Y43[2.41], V46[2.44], S47[2.45], K122[4.43], I125[4.46], A126[4.47], W129[4.50], F133[4.54]                                                                |
|                                                                      | -13.6          | F93[3.41], L96[3.44], A97[3.45], I100[3.48], L115, V116, R120[4.41], I124[4.45], C185[5.46], P189[5.50]                                                    |
|                                                                      | -13.0          | V25[1.51], C28[1.54], W29[1.55], A50[2.48], I53[2.51], A54[2.52], L58[2.56], F79[3.27], F83[3.31], F133[4.54]                                              |
|                                                                      | -12.8          | F182[5.43], L187[5.48], L191[5.52], L194[5.55], K233[6.35], A236[6.38], I237[6.39], G240[6.42], A243[6.45], L247[6.49]                                     |
|                                                                      | -12.5          | V12[1.38], L241[6.43], L272[7.37], V275[7.40], T279[7.44], V282[7.47], V283[7.48], F286[7.51], I287[7.52], Y290[7.55]                                      |
|                                                                      | -12.5          | L241[6.43], L244[6.46], C245[6.47], L272[7.37], L276[7.41], V283[7.48], F286[7.51], I287[7.52], Y290[7.55]                                                 |
| A2A adenosine receptor, inactive state, with cholesterol, Human 5k2b |                |                                                                                                                                                            |
| 5k2b_EC                                                              | -15.0          | A0, P1[1.27], P2[1.28], G5[1.31], V8[1.34], Y9[1.35], V12[1.38], L267[7.32], W268[7.33], Y271[7.36], L272[7.37], V275[7.40]                                |
|                                                                      | -13.9          | V57[2.55], L58[2.56], F62[2.60], T65[2.63], F70, A72, A73[3.21], G76[3.24], C77[3.25], I80[3.28]                                                           |
|                                                                      | -13.8          | F182[5.43], F183[5.44], L187[5.48], L190[5.51], L191[5.52], A243[6.45], L247[6.49], I251[6.53], C254[6.56], F255[6.57], F258[6.60], C259[6.61]             |
|                                                                      | -13.0          | L244[6.46], P248[6.50], I251[6.53], I252[6.54], F255[6.57], C262, S263, A265, L269[7.34]                                                                   |
|                                                                      | -12.3          | H75[3.23], F79[3.27], W129[4.50], V130[4.51], F133[4.54], L137[4.58], M140[4.61], L141[4.62]                                                               |
| 5k2b_IC                                                              | -14.3          | Y43[2.41], F44[2.42], V46[2.44], S47[2.45], K122[4.43], I125[4.46], A126[4.47], W129[4.50], F133[4.54]                                                     |
|                                                                      | -14.0          | F93[3.41], L96[3.44], A97[3.45], I100[3.48], I104[3.52], L115, V116, I124[4.45], P189[5.50]                                                                |
|                                                                      | -13.2          | V25[1.51], C28[1.54], W29[1.55], A50[2.48], I53[2.51], A54[2.52], L58[2.56], F79[3.27], F83[3.31], F133[4.54]                                              |
|                                                                      | -13.1          | L187[5.48], L191[5.52], L194[5.55], F201[5.62], K233[6.35], A236[6.38], I237[6.39], G240[6.42], A243[6.45], L247[6.49]                                     |
| A2A adenosine receptor, inactive state, with cholesterol, Human 5k2c |                |                                                                                                                                                            |
| 5k2c_EC                                                              | -14.2          | G5[1.31], V8[1.34], Y9[1.35], V12[1.38], L267[7.32], W268[7.33], Y271[7.36], L272[7.37], V275[7.40], T279[7.44]                                            |
|                                                                      | -13.5          | F182[5.43], F183[5.44], L187[5.48], L190[5.51], L191[5.52], L247[6.49], I251[6.53], C254[6.56], F255[6.57], F258[6.60], C259[6.61]                         |
|                                                                      | -13.2          | F62[2.60], T65[2.63], F70, A72, G76[3.24], C77[3.25], F79[3.27], I80[3.28]                                                                                 |
|                                                                      | -12.5          | L244[6.46], P248[6.50], I251[6.53], I252[6.54], F255[6.57], A265, P266[7.31], L269[7.34]                                                                   |
|                                                                      | -13.6          | L14[1.40], A17[1.43], V18[1.44], I21[1.47], P61[2.59], I64[2.62], T65[2.63], F70                                                                           |

| PDB <sup>a</sup>                                                     | E <sup>b</sup>                                                                                            | Local Residues <sup>c</sup>                                                                                                                    |
|----------------------------------------------------------------------|-----------------------------------------------------------------------------------------------------------|------------------------------------------------------------------------------------------------------------------------------------------------|
| 5k2c_IC                                                              | -13.9                                                                                                     | Y43[2.41], V46[2.44], S47[2.45], K122[4.43], I125[4.46], A126[4.47], W129[4.50], V130[4.51], F133[4.54]                                        |
|                                                                      | -13.5                                                                                                     | F201[5.62], K233[6.35], A236[6.38], I237[6.39], G240[6.42], L244[6.46], L247[6.49], P248[6.50], I251[6.53]                                     |
|                                                                      | -13.3                                                                                                     | F93[3.41], L96[3.44], A97[3.45], I100[3.48], I104[3.52], L115, V116, I124[4.45], I135[4.56]                                                    |
|                                                                      | -13.0                                                                                                     | C28[1.54], W32[1.58], V46[2.44], A50[2.48], I53[2.51], L58[2.56], F79[3.27], F83[3.31], F133[4.54]                                             |
| A2A adenosine receptor, inactive state, with cholesterol, Human 5k2d |                                                                                                           |                                                                                                                                                |
| 5k2d_EC                                                              | -14.5                                                                                                     | A0, G5[1.31], V8[1.34], Y9[1.35], V12[1.38], L267[7.32], W268[7.33], Y271[7.36], L272[7.37], V275[7.40], T279[7.44]                            |
|                                                                      | -13.4                                                                                                     | F182[5.43], F183[5.44], L187[5.48], L194[5.55], L247[6.49], I251[6.53], C254[6.56], F255[6.57], F258[6.60]                                     |
|                                                                      | -12.6                                                                                                     | V57[2.55], L58[2.56], P61[2.59], F62[2.60], T65[2.63], F70, A72, G76[3.24], I80[3.28]                                                          |
|                                                                      | -12.6                                                                                                     | L244[6.46], L247[6.49], P248[6.50], I251[6.53], I252[6.54], F255[6.57], A265, L269[7.34]                                                       |
|                                                                      | -12.5                                                                                                     | L14[1.40], A17[1.43], V18[1.44], I21[1.47], P61[2.59], I64[2.62], T65[2.63], T68[2.66], F70                                                    |
|                                                                      | -12.3                                                                                                     | H75[3.23], W129[4.50], V130[4.51], F133[4.54], A134[4.55], L137[4.58], M140[4.61], L141[4.62]                                                  |
|                                                                      | -12.2                                                                                                     | F93[3.41], L131[4.52], A134[4.55], I135[4.56], T138[4.59], L141[4.62], W143, F180[5.41]                                                        |
| 5k2d_IC                                                              | -14.1                                                                                                     | F93[3.41], L96[3.44], A97[3.45], I100[3.48], L115, V116, T117[4.38], R120[4.41], I124[4.45], P189[5.50]                                        |
|                                                                      | -14.0                                                                                                     | Y43[2.41], V46[2.44], S47[2.45], K122[4.43], I125[4.46], A126[4.47], W129[4.50], V130[4.51], F133[4.54]                                        |
|                                                                      | -13.4                                                                                                     | L241[6.43], L272[7.37], V275[7.40], L276[7.41], T279[7.44], V283[7.48], F286[7.51], I287[7.52], Y290[7.55]                                     |
|                                                                      | -12.8                                                                                                     | L187[5.48], L191[5.52], L194[5.55], K233[6.35], A236[6.38], I237[6.39], G240[6.42], A243[6.45], L247[6.49]                                     |
|                                                                      | -13.4                                                                                                     | C28[1.54], W32[1.58], V46[2.44], A50[2.48], I53[2.51], A54[2.52], L58[2.56], F79[3.27], F83[3.31], F133[4.54]                                  |
| A2A adenosine receptor, inactive state, with cholesterol, Human 5mzj |                                                                                                           |                                                                                                                                                |
| 5mzj_EC                                                              | -14.2                                                                                                     | I251[6.53], I252[6.54], F255[6.57], S263, H264, A265, P266[7.31], L269[7.34]                                                                   |
|                                                                      | -14.0                                                                                                     | G5[1.31], V8[1.34], Y9[1.35], V12[1.38], W268[7.33], Y271[7.36], L272[7.37], V275[7.40], T279[7.44]                                            |
|                                                                      | -13.0                                                                                                     | F182[5.43], F183[5.44], L187[5.48], L191[5.52], L247[6.49], I251[6.53], C254[6.56], F255[6.57], F258[6.60], C259[6.61]                         |
|                                                                      | -12.8                                                                                                     | F79[3.27], A126[4.47], W129[4.50], V130[4.51], F133[4.54], L137[4.58], M140[4.61], L141[4.62]                                                  |
|                                                                      | -12.6                                                                                                     | F93[3.41], L131[4.52], A134[4.55], I135[4.56], T138[4.59], L141[4.62], W143, F180[5.41]                                                        |
|                                                                      | -12.3                                                                                                     | F93[3.41], L96[3.44], F180[5.41], A184[5.45], C185[5.46], V188[5.49], P189[5.50], L192[5.53]                                                   |
|                                                                      | -12.1                                                                                                     | I21[1.47], V57[2.55], L58[2.56], P61[2.59], F62[2.60], T65[2.63], F70, I80[3.28]                                                               |
| 5mzj_IC                                                              | -14.0                                                                                                     | F182[5.43], L187[5.48], L190[5.51], L191[5.52], L194[5.55], Y197[5.58], F201[5.62], A236[6.38], G240[6.42], A243[6.45], L247[6.49], I251[6.53] |
|                                                                      | -13.9                                                                                                     | C28[1.54], W29[1.55], W32[1.58], V46[2.44], A50[2.48], L54[2.52], L58[2.56], F83[3.31], F133[4.54]                                             |
|                                                                      | -13.7                                                                                                     | Y43[2.41], V46[2.44], S47[2.45], A50[2.48], L54[2.52], F83[3.31], A122[4.43], I125[4.46], W129[4.50], F133[4.54]                               |
|                                                                      | -12.8                                                                                                     | F93[3.41], L96[3.44], A97[3.45], I100[3.48], I104[3.52], V116, I124[4.45], I135[4.56]                                                          |
|                                                                      | -12.5                                                                                                     | L241[6.43], L244[6.46], C245[6.47], L272[7.37], L276[7.41], T279[7.44], V283[7.48], F286[7.51], I287[7.52], Y290[7.55]                         |
| -12.2                                                                | V12[1.38], L272[7.37], V275[7.40], T279[7.44], V282[7.47], V283[7.48], F286[7.51], I287[7.52], Y290[7.55] |                                                                                                                                                |
| A2A adenosine receptor, inactive state, with cholesterol, Human 5mzp |                                                                                                           |                                                                                                                                                |
| 5mzp_EC                                                              | -14.1                                                                                                     | A0, G5[1.31], V8[1.34], Y9[1.35], V12[1.38], I16[1.42], W268[7.33], Y271[7.36], L272[7.37], V275[7.40], T279[7.44]                             |
|                                                                      | -13.0                                                                                                     | F182[5.43], F183[5.44], L187[5.48], L191[5.52], L247[6.49], I251[6.53], C254[6.56], F255[6.57], F258[6.60], C259[6.61]                         |
|                                                                      | -12.7                                                                                                     | I251[6.53], I252[6.54], F255[6.57], C262, S263, H264, A265, L269[7.34]                                                                         |
|                                                                      | -12.5                                                                                                     | F93[3.41], L96[3.44], L131[4.52], A134[4.55], I135[4.56], T138[4.59], L141[4.62], F180[5.41]                                                   |
|                                                                      | -12.4                                                                                                     | V18[1.44], I21[1.47], V57[2.55], L58[2.56], P61[2.59], F62[2.60], T65[2.63], F70, I80[3.28]                                                    |
| 5mzp_IC                                                              | -13.7                                                                                                     | F182[5.43], L187[5.48], L190[5.51], L191[5.52], L194[5.55], Y197[5.58], F201[5.62], A236[6.38], G240[6.42], A243[6.45], L247[6.49], I251[6.53] |
|                                                                      | -13.6                                                                                                     | C28[1.54], W29[1.55], V31[1.57], W32[1.58], V46[2.44], A50[2.48], W129[4.50], F133[4.54]                                                       |
|                                                                      | -13.3                                                                                                     | C28[1.54], W29[1.55], W32[1.58], V46[2.44], A50[2.48], L54[2.52], L58[2.56], F83[3.31], F133[4.54]                                             |
|                                                                      | -13.1                                                                                                     | Q89[3.37], F93[3.41], L96[3.44], A97[3.45], I100[3.48], L115, V116, R120[4.41], I124[4.45], A184[5.45], C185[5.46], P189[5.50]                 |
| -12.3                                                                | V12[1.38], L272[7.37], V275[7.40], T279[7.44], V282[7.47], V283[7.48], F286[7.51], I287[7.52], Y290[7.55] |                                                                                                                                                |

| PDB <sup>a</sup>                                                     | E <sup>b</sup> | Local Residues <sup>c</sup>                                                                                                             |
|----------------------------------------------------------------------|----------------|-----------------------------------------------------------------------------------------------------------------------------------------|
| A2A adenosine receptor, inactive state, with cholesterol, Human 5n2r |                |                                                                                                                                         |
| 5n2r_EC                                                              | -14.0          | G5[1.31], V8[1.34], Y9[1.35], V12[1.38], W268[7.33], Y271[7.36], L272[7.37], V275[7.40]                                                 |
|                                                                      | -13.1          | F182[5.43], F183[5.44], L187[5.48], L191[5.52], A243[6.45], L247[6.49], I251[6.53], C254[6.56], F255[6.57], F258[6.60], C259[6.61]      |
|                                                                      | -12.4          | L14[1.40], A17[1.43], V18[1.44], I21[1.47], L22[1.48], V57[2.55], P61[2.59], I64[2.62]                                                  |
|                                                                      | -12.3          | L244[6.46], L247[6.49], P248[6.50], I251[6.53], I252[6.54], F255[6.57], A265, P266[7.31], L269[7.34]                                    |
|                                                                      | -12.9          | F93[3.41], L131[4.52], A134[4.55], I135[4.56], T138[4.59], L141[4.62], W143, F180[5.41]                                                 |
|                                                                      | -12.6          | F93[3.41], L96[3.44], F180[5.41], A184[5.45], C185[5.46], V188[5.49], P189[5.50], L192[5.53]                                            |
| 5n2r_IC                                                              | -13.9          | F182[5.43], L187[5.48], L190[5.51], L191[5.52], L194[5.55], Y197[5.58], F201[5.62], A236[6.38], G240[6.42], A243[6.45], L247[6.49]      |
|                                                                      | -13.8          | Y43[2.41], V46[2.44], S47[2.45], A50[2.48], L54[2.52], L58[2.56], F83[3.31], A122[4.43], I125[4.46], W129[4.50], F133[4.54]             |
|                                                                      | -13.9          | C28[1.54], V31[1.57], W32[1.58], V46[2.44], A50[2.48], L54[2.52], V57[2.55], L58[2.56]                                                  |
|                                                                      | -12.8          | F93[3.41], L96[3.44], A97[3.45], I100[3.48], I104[3.52], L115, I124[4.45], L131[4.52], I135[4.56], A184[5.45], C185[5.46]               |
|                                                                      | -12.6          | V25[1.51], C28[1.54], W29[1.55], W32[1.58], L33[1.59], I53[2.51], L54[2.52], V57[2.55], L58[2.56]                                       |
| A2A adenosine receptor, inactive state, with cholesterol, Human 5nlx |                |                                                                                                                                         |
| 5nlx_EC                                                              | -13.6          | G14[1.40], V17[1.43], Y18[1.44], V21[1.47], W373, Y376, L377, V380                                                                      |
|                                                                      | -13.5          | F191[5.52], L196[5.57], L200[5.61], L352, I356, C359, F360, F363, C364                                                                  |
|                                                                      | -13.4          | L349, P353, I357, F360, C367, S368, A370, L374                                                                                          |
|                                                                      | -12.9          | F102[3.50], L140[4.61], A143, I144, T147, L150, W152, F189[5.50]                                                                        |
|                                                                      | -12.5          | L23[1.49], V27[1.53], I30[1.56], L31[1.57], V66[2.64], P70, I73[3.21], T74[3.22]                                                        |
| 5nlx_IC                                                              | -13.9          | Y52[2.50], V55[2.53], S56[2.54], A59[2.57], L63[2.61], L67[2.65], F92[3.40], G127[4.48], A131[4.52], I134[4.55], W138[4.59], F142[4.63] |
|                                                                      | -13.6          | F191[5.52], F192[5.53], L196[5.57], L199[5.60], L203[5.64], A341, G345, A348, L352                                                      |
|                                                                      | -13.6          | C37, V40[2.38], W41[2.39], V55[2.53], A59[2.57], L63[2.61], V66[2.64], L67[2.65]                                                        |
| A2A adenosine receptor, inactive state, with cholesterol, Human 5nm2 |                |                                                                                                                                         |
| 5nm2_EC                                                              | -14.3          | A0, G5[1.31], V8[1.34], Y9[1.35], V12[1.38], I16[1.42], W268[7.33], Y271[7.36], L272[7.37], V275[7.40], T279[7.44]                      |
|                                                                      | -14.1          | L244[6.46], P248[6.50], I251[6.53], I252[6.54], F255[6.57], C262, S263, A265, L269[7.34]                                                |
|                                                                      | -13.0          | F182[5.43], L187[5.48], L247[6.49], I251[6.53], C254[6.56], F255[6.57], F258[6.60], C259[6.61], C262                                    |
|                                                                      | -12.6          | F93[3.41], L96[3.44], L131[4.52], A134[4.55], I135[4.56], T138[4.59], L141[4.62], F180[5.41]                                            |
|                                                                      | -12.3          | I21[1.47], V57[2.55], L58[2.56], P61[2.59], F62[2.60], T65[2.63], F70, I80[3.28]                                                        |
| 5nm2_IC                                                              | -13.8          | F182[5.43], L187[5.48], L190[5.51], L191[5.52], L194[5.55], F201[5.62], A236[6.38], G240[6.42], A243[6.45], L247[6.49], I251[6.53]      |
|                                                                      | -13.4          | Y43[2.41], V46[2.44], S47[2.45], A50[2.48], L54[2.52], L58[2.56], F83[3.31], A122[4.43], I125[4.46], W129[4.50]                         |
|                                                                      | -13.2          | F93[3.41], L96[3.44], A97[3.45], I100[3.48], L115, V116, I124[4.45], C185[5.46]                                                         |
|                                                                      | -13.5          | C28[1.54], W32[1.58], V46[2.44], A50[2.48], I53[2.51], L54[2.52], V57[2.55], L58[2.56]                                                  |
| A2A adenosine receptor, inactive state, with cholesterol, Human 5nm4 |                |                                                                                                                                         |
| 5nm4_EC                                                              | -14.2          | P353, I356, I357, F360, C367, S368, H369, A370, L374                                                                                    |
|                                                                      | -13.7          | G14[1.40], V17[1.43], Y18[1.44], V21[1.47], I25[1.51], W373, Y376, L377, V380, T384                                                     |
|                                                                      | -13.0          | F192[5.53], L196[5.57], L200[5.61], L352, I356, C359, F360, F363, C364                                                                  |
|                                                                      | -12.5          | F102[3.50], L105[3.53], L140[4.61], A143, I144, T147, L150, F189[5.50]                                                                  |
| 5nm4_IC                                                              | -13.9          | F191[5.52], F192[5.53], L196[5.57], L199[5.60], L203[5.64], K338, A341, G345, A348, L352                                                |
|                                                                      | -13.8          | Y52[2.50], V55[2.53], S56[2.54], A59[2.57], L63[2.61], L67[2.65], F92[3.40], A131[4.52], I134[4.55], W138[4.59], F142[4.63]             |
|                                                                      | -13.6          | C37, W41[2.39], V55[2.53], A59[2.57], I62[2.60], L63[2.61], V66[2.64], L67[2.65]                                                        |
| A2A adenosine receptor, inactive state, with cholesterol, Human Solg |                |                                                                                                                                         |
| Solg_EC                                                              | -14.4          | A0, G5[1.31], V8[1.34], Y9[1.35], V12[1.38], L267[7.32], W268[7.33], Y271[7.36], L272[7.37], V275[7.40], T279[7.44]                     |

| PDB <sup>a</sup>                                                     | E <sup>b</sup> | Local Residues <sup>c</sup>                                                                                                                    |
|----------------------------------------------------------------------|----------------|------------------------------------------------------------------------------------------------------------------------------------------------|
|                                                                      | -13.9          | L244[6.46], P248[6.50], I251[6.53], I252[6.54], F255[6.57], C262, S263, A265, P266[7.31], L269[7.34]                                           |
|                                                                      | -12.9          | F182[5.43], F183[5.44], L187[5.48], L191[5.52], L247[6.49], I251[6.53], C254[6.56], F255[6.57], F258[6.60], C259[6.61]                         |
|                                                                      | -12.6          | F93[3.41], L96[3.44], L131[4.52], A134[4.55], I135[4.56], T138[4.59], L141[4.62], F180[5.41]                                                   |
| Solg_IC                                                              | -14.3          | C28[1.54], W29[1.55], V31[1.57], W32[1.58], V46[2.44], A50[2.48], I125[4.46], W129[4.50], V130[4.51], F133[4.54]                               |
|                                                                      | -13.8          | F182[5.43], L187[5.48], L190[5.51], L191[5.52], L194[5.55], Y197[5.58], F201[5.62], A236[6.38], G240[6.42], A243[6.45], L247[6.49], I251[6.53] |
|                                                                      | -13.5          | F44[2.42], F93[3.41], L96[3.44], A97[3.45], I100[3.48], I104[3.52], L115, V116, I124[4.45], C128[4.49], L131[4.52], I135[4.56]                 |
| A2A adenosine receptor, inactive state, with cholesterol, Human 50lh |                |                                                                                                                                                |
| Solh_EC                                                              | -13.8          | I251[6.53], I252[6.54], F255[6.57], C262, S263, H264, A265, P266[7.31]                                                                         |
|                                                                      | -13.7          | G5[1.31], V8[1.34], Y9[1.35], V12[1.38], I16[1.42], W268[7.33], Y271[7.36], L272[7.37], V275[7.40], T279[7.44]                                 |
|                                                                      | -13.2          | F182[5.43], F183[5.44], L187[5.48], L191[5.52], L247[6.49], I251[6.53], C254[6.56], F255[6.57], F258[6.60], C259[6.61]                         |
|                                                                      | -12.2          | F93[3.41], L96[3.44], L131[4.52], I135[4.56], T138[4.59], L141[4.62], F180[5.41], P189[5.50]                                                   |
| Solh_IC                                                              | -13.6          | Y43[2.41], V46[2.44], S47[2.45], I125[4.46], A126[4.47], W129[4.50], V130[4.51], F133[4.54]                                                    |
|                                                                      | -13.4          | F182[5.43], L187[5.48], L190[5.51], L191[5.52], L194[5.55], Y197[5.58], F201[5.62], A236[6.38], G240[6.42], A243[6.45], L247[6.49], I251[6.53] |
| A2A adenosine receptor, inactive state, with cholesterol, Human Solo |                |                                                                                                                                                |
| Solo_EC                                                              | -13.0          | G5[1.31], V8[1.34], Y9[1.35], V12[1.38], W268[7.33], Y271[7.36], L272[7.37], V275[7.40]                                                        |
|                                                                      | -13.0          | F79[3.27], A126[4.47], W129[4.50], V130[4.51], F133[4.54], L137[4.58], M140[4.61], L141[4.62]                                                  |
|                                                                      | -12.8          | F182[5.43], F183[5.44], L187[5.48], L190[5.51], L191[5.52], A243[6.45], L247[6.49], I251[6.53], C254[6.56], F255[6.57], F258[6.60], C259[6.61] |
|                                                                      | -12.4          | L14[1.40], A17[1.43], V18[1.44], I21[1.47], L22[1.48], G56[2.54], V57[2.55], P61[2.59], I64[2.62]                                              |
|                                                                      | -12.2          | A50[2.48], L54[2.52], L58[2.56], F62[2.60], F79[3.27], F83[3.31], W129[4.50], F133[4.54]                                                       |
|                                                                      | -12.3          | L244[6.46], P248[6.50], I251[6.53], I252[6.54], F255[6.57], A265, P266[7.31], L269[7.34]                                                       |
| Solo_IC                                                              | -14.0          | Y43[2.41], V46[2.44], S47[2.45], A122[4.43], I125[4.46], A126[4.47], W129[4.50], V130[4.51], F133[4.54]                                        |
|                                                                      | -13.9          | F182[5.43], L187[5.48], L190[5.51], L191[5.52], L194[5.55], Y197[5.58], F201[5.62], A236[6.38], G240[6.42], A243[6.45], L247[6.49], I251[6.53] |
|                                                                      | -12.9          | C28[1.54], V31[1.57], W32[1.58], V46[2.44], A50[2.48], L54[2.52], V57[2.55], L58[2.56]                                                         |
|                                                                      | -12.5          | V12[1.38], I16[1.42], I237[6.39], L241[6.43], V275[7.40], T279[7.44], V283[7.48], F286[7.51], I287[7.52], R291[7.56]                           |
| A2A adenosine receptor, inactive state, with cholesterol, Human Solv |                |                                                                                                                                                |
| Solv_EC                                                              | -14.7          | I251[6.53], I252[6.54], F255[6.57], C262, S263, H264, A265, L269[7.34]                                                                         |
|                                                                      | -13.9          | L187[5.48], L191[5.52], L247[6.49], I251[6.53], C254[6.56], F255[6.57], F258[6.60], C259[6.61]                                                 |
|                                                                      | -13.6          | G5[1.31], V8[1.34], Y9[1.35], V12[1.38], I16[1.42], W268[7.33], Y271[7.36], L272[7.37], V275[7.40], T279[7.44]                                 |
| Solv_IC                                                              | -13.7          | Y43[2.41], V46[2.44], S47[2.45], A50[2.48], L54[2.52], L58[2.56], F83[3.31], A122[4.43], I125[4.46], W129[4.50], F133[4.54]                    |
|                                                                      | -13.7          | F182[5.43], F183[5.44], L187[5.48], L190[5.51], L194[5.55], A236[6.38], G240[6.42], A243[6.45], L247[6.49]                                     |
|                                                                      | -13.5          | V25[1.51], C28[1.54], W29[1.55], W32[1.58], V46[2.44], A50[2.48], L54[2.52], L58[2.56], F83[3.31], F133[4.54]                                  |
|                                                                      | -12.8          | F93[3.41], L96[3.44], A97[3.45], I100[3.48], I104[3.52], I124[4.45], L131[4.52], I135[4.56], A184[5.45], C185[5.46]                            |
| A2A adenosine receptor, inactive state, with cholesterol, Human Solz |                |                                                                                                                                                |
| Solz_EC                                                              | -13.9          | G5[1.31], V8[1.34], Y9[1.35], V12[1.38], I16[1.42], W268[7.33], Y271[7.36], L272[7.37], V275[7.40], T279[7.44]                                 |
|                                                                      | -13.8          | F182[5.43], F183[5.44], L187[5.48], L190[5.51], L191[5.52], L247[6.49], I251[6.53], C254[6.56], F255[6.57], F258[6.60], C259[6.61]             |
|                                                                      | -12.5          | L244[6.46], P248[6.50], I252[6.54], F255[6.57], C262, A265, L269[7.34], L276[7.41]                                                             |
|                                                                      | -12.5          | F93[3.41], L96[3.44], L131[4.52], A134[4.55], I135[4.56], T138[4.59], L141[4.62], F180[5.41]                                                   |
|                                                                      | -12.4          | I21[1.47], V57[2.55], L58[2.56], P61[2.59], F62[2.60], T65[2.63], F70, I80[3.28]                                                               |
|                                                                      | -12.1          | L244[6.46], L247[6.49], P248[6.50], I251[6.53], I252[6.54], F255[6.57], A265, P266[7.31], L269[7.34]                                           |
| Solz_IC                                                              | -13.5          | Y43[2.41], V46[2.44], S47[2.45], A50[2.48], L54[2.52], L58[2.56], F83[3.31], I125[4.46], W129[4.50], F133[4.54]                                |



| PDB <sup>a</sup>                                                     | E <sup>b</sup> | Local Residues <sup>c</sup>                                                                                                                    |
|----------------------------------------------------------------------|----------------|------------------------------------------------------------------------------------------------------------------------------------------------|
|                                                                      | -13.5          | F182[5.43], L187[5.48], L190[5.51], L191[5.52], L194[5.55], Y197[5.58], F201[5.62], A236[6.38], G240[6.42], A243[6.45], L247[6.49]             |
|                                                                      | -13.5          | F44[2.42], F93[3.41], L96[3.44], A97[3.45], I100[3.48], I104[3.52], L115, V116, I124[4.45], I135[4.56]                                         |
|                                                                      | -13.4          | C28[1.54], W29[1.55], W32[1.58], V46[2.44], A50[2.48], L54[2.52], L58[2.56], F83[3.31], F133[4.54]                                             |
|                                                                      | -12.8          | L241[6.43], L244[6.46], C245[6.47], P248[6.50], L272[7.37], L276[7.41], T279[7.44], V283[7.48], F286[7.51], I287[7.52], Y290[7.55]             |
| A2A adenosine receptor, inactive state, with cholesterol, Human 5om1 |                |                                                                                                                                                |
| 5om1_EC                                                              | -14.5          | I251[6.53], I252[6.54], F255[6.57], T256[6.58], C262, S263, H264, A265, L269[7.34]                                                             |
|                                                                      | -13.9          | A0, G5[1.31], V8[1.34], Y9[1.35], V12[1.38], I16[1.42], W268[7.33], Y271[7.36], L272[7.37], V275[7.40]                                         |
|                                                                      | -13.6          | L187[5.48], L191[5.52], L247[6.49], I251[6.53], C254[6.56], F255[6.57], F258[6.60], C259[6.61]                                                 |
|                                                                      | -12.6          | F93[3.41], L131[4.52], A134[4.55], I135[4.56], T138[4.59], L141[4.62], W143, F180[5.41]                                                        |
|                                                                      | -12.2          | V18[1.44], I21[1.47], V57[2.55], L58[2.56], P61[2.59], F62[2.60], T65[2.63], F70, I80[3.28]                                                    |
| 5om1_IC                                                              | -14.0          | L187[5.48], L191[5.52], L194[5.55], A236[6.38], I237[6.39], G240[6.42], A243[6.45], L247[6.49]                                                 |
|                                                                      | -13.5          | Y43[2.41], V46[2.44], S47[2.45], A50[2.48], L54[2.52], F83[3.31], I125[4.46], W129[4.50], F133[4.54]                                           |
|                                                                      | -13.2          | C28[1.54], V31[1.57], W32[1.58], V46[2.44], A50[2.48], L54[2.52], V57[2.55], L58[2.56]                                                         |
| A2A adenosine receptor, inactive state, with cholesterol, Human 5om4 |                |                                                                                                                                                |
| 5om4_EC                                                              | -14.7          | I251[6.53], I252[6.54], F255[6.57], C262, S263, H264, A265, L269[7.34]                                                                         |
|                                                                      | -14.0          | A0, G5[1.31], V8[1.34], Y9[1.35], V12[1.38], W268[7.33], Y271[7.36], L272[7.37], V275[7.40], T279[7.44]                                        |
|                                                                      | -13.2          | F182[5.43], F183[5.44], L187[5.48], L191[5.52], I251[6.53], C254[6.56], F255[6.57], F258[6.60], C259[6.61]                                     |
| 5om4_IC                                                              | -14.1          | F182[5.43], L187[5.48], L190[5.51], L191[5.52], L194[5.55], Y197[5.58], F201[5.62], A236[6.38], G240[6.42], A243[6.45], L247[6.49], I251[6.53] |
|                                                                      | -13.7          | Y43[2.41], V46[2.44], S47[2.45], A50[2.48], L54[2.52], L58[2.56], F83[3.31], A122[4.43], I125[4.46], W129[4.50], F133[4.54]                    |
|                                                                      | -13.3          | V25[1.51], C28[1.54], W29[1.55], W32[1.58], V46[2.44], A50[2.48], L54[2.52], L58[2.56], F133[4.54]                                             |
|                                                                      | -13.0          | Q89[3.37], F93[3.41], L96[3.44], A97[3.45], I100[3.48], I104[3.52], L115, V116, I124[4.45], I135[4.56], A184[5.45], C185[5.46], P189[5.50]     |
|                                                                      | -12.5          | L241[6.43], L244[6.46], C245[6.47], L272[7.37], L276[7.41], T279[7.44], V283[7.48], F286[7.51], I287[7.52], Y290[7.55]                         |
| A2A adenosine receptor, inactive state, with cholesterol, Human 5uvi |                |                                                                                                                                                |
| 5uvi_EC                                                              | -14.3          | P2[1.28], G5[1.31], V8[1.34], Y9[1.35], V12[1.38], W268[7.33], Y271[7.36], L272[7.37], V275[7.40], T279[7.44]                                  |
|                                                                      | -13.4          | F182[5.43], F183[5.44], L187[5.48], L190[5.51], L191[5.52], A243[6.45], L247[6.49], I251[6.53], C254[6.56], F255[6.57], F258[6.60]             |
|                                                                      | -12.5          | L244[6.46], P248[6.50], I251[6.53], I252[6.54], F255[6.57], S263, A265, L269[7.34]                                                             |
| 5uvi_IC                                                              | -14.2          | Y43[2.41], V46[2.44], S47[2.45], K122[4.43], I125[4.46], A126[4.47], W129[4.50], F133[4.54]                                                    |
|                                                                      | -13.3          | F182[5.43], L187[5.48], L190[5.51], L191[5.52], L194[5.55], F201[5.62], K233[6.35], A236[6.38], G240[6.42], A243[6.45], L247[6.49], I251[6.53] |
|                                                                      | -13.2          | F93[3.41], L96[3.44], A97[3.45], I100[3.48], I104[3.52], L115, V116, I124[4.45], I135[4.56], A184[5.45], C185[5.46], P189[5.50]                |
|                                                                      | -13.8          | C28[1.54], W32[1.58], V46[2.44], A50[2.48], I53[2.51], A54[2.52], L58[2.56], F79[3.27], F83[3.31], F133[4.54]                                  |
|                                                                      | -12.4          | V12[1.38], L272[7.37], V275[7.40], T279[7.44], V282[7.47], V283[7.48], F286[7.51], I287[7.52]                                                  |
| A2A adenosine receptor, inactive state, with cholesterol, Human 5vra |                |                                                                                                                                                |
| 5vra_EC                                                              | -14.6          | A0, P2[1.28], G5[1.31], V8[1.34], Y9[1.35], V12[1.38], I16[1.42], L267[7.32], W268[7.33], Y271[7.36], L272[7.37], V275[7.40], T279[7.44]       |
|                                                                      | -13.5          | I251[6.53], I252[6.54], F255[6.57], S263, H264, A265, P266[7.31], L269[7.34]                                                                   |
|                                                                      | -13.3          | F182[5.43], F183[5.44], L187[5.48], L190[5.51], L191[5.52], L247[6.49], I251[6.53], C254[6.56], F255[6.57], F258[6.60], C259[6.61]             |
|                                                                      | -12.9          | I10[1.36], L14[1.40], V18[1.44], P61[2.59], I64[2.62], T65[2.63], T68[2.66], F70                                                               |
|                                                                      | -13.3          | V57[2.55], L58[2.56], P61[2.59], F62[2.60], T65[2.63], F70, A72, I80[3.28]                                                                     |
|                                                                      | -12.6          | F93[3.41], L131[4.52], A134[4.55], I135[4.56], T138[4.59], L141[4.62], W143, F180[5.41]                                                        |
| 5vra_IC                                                              | -14.8          | Y43[2.41], F44[2.42], V46[2.44], S47[2.45], K122[4.43], I125[4.46], A126[4.47], W129[4.50]                                                     |

| PDB <sup>a</sup>                                                     | E <sup>b</sup> | Local Residues <sup>c</sup>                                                                                                                                |
|----------------------------------------------------------------------|----------------|------------------------------------------------------------------------------------------------------------------------------------------------------------|
|                                                                      | -13.5          | F182[5.43], L187[5.48], L190[5.51], L191[5.52], L194[5.55], Y197[5.58], F201[5.62], A236[6.38], V239[6.41], G240[6.42], A243[6.45], L247[6.49], I251[6.53] |
|                                                                      | -13.3          | F93[3.41], L96[3.44], A97[3.45], I100[3.48], L115, V116, I124[4.45], I135[4.56], A184[5.45], C185[5.46], P189[5.50]                                        |
|                                                                      | -12.8          | V25[1.51], C28[1.54], A50[2.48], I53[2.51], A54[2.52], V57[2.55], L58[2.56], F79[3.27], F83[3.31], F133[4.54]                                              |
|                                                                      | -12.2          | V8[1.34], V12[1.38], I16[1.42], L272[7.37], V275[7.40], T279[7.44], V282[7.47], F286[7.51], Y290[7.55]                                                     |
|                                                                      | -12.8          | L241[6.43], L244[6.46], C245[6.47], P248[6.50], L276[7.41], V283[7.48], F286[7.51], I287[7.52]                                                             |
| A2A adenosine receptor, inactive state, with cholesterol, Human 6aqf |                |                                                                                                                                                            |
| 6aqf_EC                                                              | -14.5          | A0, P2[1.28], G5[1.31], V8[1.34], Y9[1.35], V12[1.38], L267[7.32], W268[7.33], Y271[7.36], L272[7.37], V275[7.40], T279[7.44]                              |
|                                                                      | -14.0          | I251[6.53], I252[6.54], F255[6.57], C262, S263, H264, A265, P266[7.31], L269[7.34]                                                                         |
|                                                                      | -13.1          | F182[5.43], F183[5.44], L187[5.48], L191[5.52], L247[6.49], I251[6.53], C254[6.56], F255[6.57], F258[6.60], C259[6.61]                                     |
|                                                                      | -12.2          | F93[3.41], L96[3.44], L131[4.52], I135[4.56], T138[4.59], L141[4.62], F180[5.41], P189[5.50], L192[5.53]                                                   |
| 6aqf_IC                                                              | -14.7          | C28[1.54], V31[1.57], W32[1.58], V46[2.44], K122[4.43], I125[4.46], A126[4.47], W129[4.50], V130[4.51], F133[4.54]                                         |
|                                                                      | -12.7          | L187[5.48], L191[5.52], L194[5.55], K233[6.35], A236[6.38], I237[6.39], G240[6.42], A243[6.45], L247[6.49]                                                 |
|                                                                      | -12.3          | V12[1.38], L272[7.37], V275[7.40], T279[7.44], V283[7.48], F286[7.51], I287[7.52], Y290[7.55]                                                              |
| Adrenergic Beta-1 receptor                                           |                |                                                                                                                                                            |
| Beta-1 adrenergic, inactive, Turkey 2vt4                             |                |                                                                                                                                                            |
| 2vt4_EC                                                              | -16.1          | V172[4.56], P176[4.60], W181, W182, N204[5.35], A206[5.37], Y207[5.38], A210[5.41], I214[5.45]                                                             |
|                                                                      | -14.0          | S45[1.36], M48[1.39], A49[1.40], V52[1.43], V56[1.47], L92[2.55], P96[2.59], A99[2.62], T100[2.63]                                                         |
|                                                                      | -13.6          | L47[1.38], M48[1.39], L50[1.41], V51[1.42], L54[1.45], V102[2.65], W323[7.33], V326[7.36], A327[7.37], W330[7.40]                                          |
|                                                                      | -12.3          | Y217[5.48], L221[5.52], L304[6.49], L308[6.53], I311[6.56], V312[6.57], F315[6.60], N316[6.61], L319                                                       |
| 2vt4_IC                                                              | -13.7          | L78[2.41], T81[2.44], S82[2.45], C85[2.48], K159[4.43], I162[4.46], C163[4.47], W166[4.50]                                                                 |
|                                                                      | -12.8          | I224[5.55], A227[5.58], L228[5.59], G293[6.38], G297[6.42], T300[6.45], L301[6.46], L304[6.49], P305[6.50], L308[6.53]                                     |
|                                                                      | -12.5          | A49[1.40], V52[1.43], L53[1.44], V56[1.47], A57[1.48], V60[1.51], L61[1.52], L356[8.57], L357[8.58]                                                        |
|                                                                      | -12.0          | V60[1.51], I63[1.54], A64[1.55], G67[1.58], L88[2.51], V89[2.52], L92[2.55], L93[2.56]                                                                     |
|                                                                      | -12.5          | E130[3.41], C133[3.44], V134[3.45], I137[3.48], I161[4.45], I168[4.52], V172[4.56], I214[5.45], P219[5.50]                                                 |
| Beta-1 adrenergic, inactive, partial agonist, Turkey 2y00            |                |                                                                                                                                                            |
| 2y00_EC                                                              | -15.1          | V172[4.56], P176[4.60], W181, N204[5.35], A206[5.37], Y207[5.38], A210[5.41], I214[5.45]                                                                   |
|                                                                      | -14.6          | W40[1.31], M48[1.39], V51[1.42], L54[1.45], V102[2.65], A327[7.37], W330[7.40], L331[7.41], A334[7.44], A337[7.47], M338[7.48], I341[7.51]                 |
|                                                                      | -14.3          | S45[1.36], A49[1.40], V52[1.43], V56[1.47], L92[2.55], P96[2.59], A99[2.62], T100[2.63], V103[2.66]                                                        |
|                                                                      | -12.6          | Y217[5.48], L220[5.51], L221[5.52], L304[6.49], L308[6.53], I311[6.56], V312[6.57], F315[6.60], L319                                                       |
|                                                                      | -12.4          | L301[6.46], P305[6.50], L319, V320, P321[7.31], L324[7.34], F328[7.38], L331[7.41]                                                                         |
| 2y00_IC                                                              | -13.6          | L78[2.41], T81[2.44], S82[2.45], C85[2.48], K159[4.43], I162[4.46], C163[4.47], W166[4.50], A170[4.54], F174[4.58]                                         |
|                                                                      | -13.0          | I224[5.55], A227[5.58], L228[5.59], Y231[5.62], G297[6.42], T300[6.45], L301[6.46], L304[6.49], L308[6.53]                                                 |
|                                                                      | -12.7          | V52[1.43], L53[1.44], V56[1.47], A57[1.48], V60[1.51], L61[1.52], A64[1.55], L356[8.57], L357[8.58]                                                        |
|                                                                      | -12.5          | L50[1.41], L53[1.44], L54[1.45], A57[1.48], L61[1.52], I341[7.51], C344[7.54], R350[8.51], F353[8.54], L357[8.58]                                          |
|                                                                      | -12.4          | L54[1.45], I294[6.39], V298[6.43], A334[7.44], M338[7.48], I341[7.51], I342[7.52], R345[7.55]                                                              |
| Beta-1 adrenergic, inactive, partial agonist, Turkey 2y01            |                |                                                                                                                                                            |
| 2y01_EC                                                              | -14.5          | W40[1.31], V51[1.42], L54[1.45], V102[2.65], A327[7.37], W330[7.40], L331[7.41], A334[7.44], A337[7.47], M338[7.48], I341[7.51]                            |
|                                                                      | -14.2          | S45[1.36], A49[1.40], V52[1.43], V56[1.47], L92[2.55], P96[2.59], A99[2.62], T100[2.63], V103[2.66], R104[2.67]                                            |
| 2y01_IC                                                              | -13.8          | V52[1.43], L53[1.44], V56[1.47], A57[1.48], V60[1.51], L61[1.52], L92[2.55], L356[8.57], L357[8.58]                                                        |
|                                                                      | -12.9          | M223[5.54], I224[5.55], A227[5.58], L228[5.59], G293[6.38], I294[6.39], M296[6.41], G297[6.42], T300[6.45], L301[6.46], L304[6.49], L308[6.53]             |

| PDB <sup>a</sup>                                          | E <sup>b</sup> | Local Residues <sup>c</sup>                                                                                                                           |
|-----------------------------------------------------------|----------------|-------------------------------------------------------------------------------------------------------------------------------------------------------|
|                                                           | -12.8          | L78[2.41], T81[2.44], S82[2.45], C85[2.48], V89[2.52], L93[2.56], L116[3.27], L120[3.31], K159[4.43], I162[4.46], C163[4.47], W166[4.50], F174[4.58]  |
|                                                           | -12.4          | I294[6.39], V298[6.43], L301[6.46], F328[7.38], L331[7.41], M338[7.48], I341[7.51], I342[7.52], R345[7.55]                                            |
|                                                           | -12.5          | L46[1.37], L50[1.41], L53[1.44], L54[1.45], A57[1.48], G58[1.49], L61[1.52], C344[7.54], F353[8.54], L357[8.58]                                       |
|                                                           | -12.2          | Y217[5.48], L221[5.52], I224[5.55], F225[5.56], L228[5.59], R229[5.60], L308[6.53], I311[6.56]                                                        |
|                                                           | -11.9          | E130[3.41], C133[3.44], V134[3.45], I137[3.48], I161[4.45], V165[4.49], I168[4.52], I214[5.45], I218[5.49], I222[5.53]                                |
| Beta-1 adrenergic, inactive, agonist, Turkey 2y02         |                |                                                                                                                                                       |
| 2y02_EC                                                   | -14.3          | P176[4.60], W181, W182, N204[5.35], A206[5.37], Y207[5.38], A210[5.41], I214[5.45]                                                                    |
|                                                           | -14.2          | S45[1.36], A49[1.40], V52[1.43], V56[1.47], L92[2.55], P96[2.59], A99[2.62], T100[2.63], V103[2.66]                                                   |
|                                                           | -14.2          | W40[1.31], M44[1.35], M48[1.39], V51[1.42], L54[1.45], V102[2.65], A327[7.37], W330[7.40], L331[7.41], A334[7.44], A337[7.47], M338[7.48], I341[7.51] |
|                                                           | -12.6          | Y217[5.48], L220[5.51], L221[5.52], L304[6.49], L308[6.53], I311[6.56], V312[6.57], F315[6.60], N316[6.61], L319                                      |
|                                                           | -12.6          | L301[6.46], L304[6.49], P305[6.50], L308[6.53], L319, V320, P321[7.31], L324[7.34], F328[7.38]                                                        |
| 2y02_IC                                                   | -13.6          | V52[1.43], V56[1.47], A57[1.48], V60[1.51], L61[1.52], L92[2.55], L356[8.57], L357[8.58]                                                              |
|                                                           | -12.9          | L78[2.41], T81[2.44], S82[2.45], C85[2.48], V89[2.52], L93[2.56], L116[3.27], L120[3.31], K159[4.43], I162[4.46], C163[4.47], F174[4.58]              |
|                                                           | -12.8          | I224[5.55], G293[6.38], I294[6.39], G297[6.42], T300[6.45], L301[6.46], L304[6.49], L308[6.53]                                                        |
|                                                           | -12.8          | E130[3.41], C133[3.44], V134[3.45], I137[3.48], I168[4.52], V172[4.56], I214[5.45], P219[5.50]                                                        |
| Beta-1 adrenergic, inactive, agonist, Turkey 2y03         |                |                                                                                                                                                       |
| 2y03_EC                                                   | -15.7          | P176[4.60], W181, W182, N204[5.35], A206[5.37], Y207[5.38], A210[5.41], I214[5.45]                                                                    |
|                                                           | -14.4          | W40[1.31], M44[1.35], M48[1.39], V51[1.42], L54[1.45], V102[2.65], A327[7.37], W330[7.40], L331[7.41], A334[7.44], A337[7.47], M338[7.48], I341[7.51] |
|                                                           | -14.1          | S45[1.36], A49[1.40], V52[1.43], V56[1.47], L92[2.55], P96[2.59], A99[2.62], T100[2.63], V103[2.66], R104[2.67]                                       |
|                                                           | -12.4          | Y217[5.48], L221[5.52], L308[6.53], I311[6.56], V312[6.57], F315[6.60], N316[6.61], L319                                                              |
|                                                           | -12.3          | A206[5.37], I209[5.40], A210[5.41], I213[5.44], I214[5.45], I218[5.49], V314[6.59], F315[6.60]                                                        |
|                                                           | -12.0          | L301[6.46], L304[6.49], L308[6.53], L319, V320, P321[7.31], L324[7.34], F328[7.38]                                                                    |
| 2y03_IC                                                   | -13.9          | V52[1.43], L53[1.44], V56[1.47], A57[1.48], V60[1.51], L61[1.52], L356[8.57], L357[8.58]                                                              |
|                                                           | -13.6          | L78[2.41], T81[2.44], S82[2.45], C85[2.48], V89[2.52], L116[3.27], L120[3.31], K159[4.43], I162[4.46], C163[4.47], W166[4.50], F174[4.58]             |
|                                                           | -12.9          | E130[3.41], C133[3.44], V134[3.45], I137[3.48], I168[4.52], V172[4.56], I214[5.45], P219[5.50]                                                        |
|                                                           | -12.3          | I224[5.55], L228[5.59], G297[6.42], T300[6.45], L301[6.46], L304[6.49], P305[6.50], L308[6.53]                                                        |
|                                                           | -12.0          | A49[1.40], L50[1.41], L53[1.44], L54[1.45], A57[1.48], L61[1.52], F353[8.54], K354[8.55], L357[8.58]                                                  |
| Beta-1 adrenergic, inactive, partial agonist, Turkey 2y04 |                |                                                                                                                                                       |
| 2y04_EC                                                   | -14.4          | W40[1.31], M48[1.39], V51[1.42], L54[1.45], V102[2.65], A327[7.37], W330[7.40], L331[7.41], A334[7.44], A337[7.47], M338[7.48], I341[7.51]            |
|                                                           | -14.3          | S45[1.36], A49[1.40], V52[1.43], V56[1.47], L92[2.55], P96[2.59], A99[2.62], T100[2.63], V103[2.66], R104[2.67]                                       |
|                                                           | -13.1          | I168[4.52], L171[4.55], V172[4.56], W181, N204[5.35], A206[5.37], Y207[5.38], A210[5.41], I214[5.45]                                                  |
|                                                           | -12.5          | Y217[5.48], L220[5.51], L221[5.52], L304[6.49], L308[6.53], I311[6.56], V312[6.57], F315[6.60]                                                        |
| 2y04_IC                                                   | -13.6          | V52[1.43], V56[1.47], A57[1.48], V60[1.51], L92[2.55], L356[8.57], L357[8.58], A358[8.59]                                                             |
|                                                           | -13.4          | M223[5.54], I224[5.55], A227[5.58], L228[5.59], G293[6.38], M296[6.41], G297[6.42], T300[6.45], L301[6.46], L304[6.49], L308[6.53]                    |
|                                                           | -13.1          | E130[3.41], C133[3.44], V134[3.45], I137[3.48], I161[4.45], I168[4.52], V172[4.56], I214[5.45], P219[5.50]                                            |
|                                                           | -12.9          | T81[2.44], S82[2.45], C85[2.48], L123[3.34], I162[4.46], C163[4.47], W166[4.50], A170[4.54], F174[4.58]                                               |
|                                                           | -12.4          | L46[1.37], A49[1.40], L50[1.41], L53[1.44], L54[1.45], A57[1.48], G58[1.49], L61[1.52], F353[8.54], L357[8.58]                                        |
|                                                           | -12.1          | I294[6.39], V298[6.43], L301[6.46], L331[7.41], M338[7.48], I341[7.51], I342[7.52], R345[7.55]                                                        |
| Beta-1 adrenergic, inactive, antagonist, Turkey 2ycw      |                |                                                                                                                                                       |
| 2ycw_EC                                                   | -14.2          | M44[1.35], L47[1.38], M48[1.39], V51[1.42], L54[1.45], V102[2.65], W323[7.33], V326[7.36], A327[7.37], W330[7.40], A334[7.44], M338[7.48]             |

| PDB <sup>a</sup>                                     | E <sup>b</sup> | Local Residues <sup>c</sup>                                                                                                               |
|------------------------------------------------------|----------------|-------------------------------------------------------------------------------------------------------------------------------------------|
|                                                      | -14.1          | E41[1.32], S45[1.36], A49[1.40], V52[1.43], V56[1.47], L92[2.55], P96[2.59], A99[2.62], T100[2.63], V103[2.66], R104[2.67]                |
|                                                      | -12.6          | L301[6.46], P305[6.50], V309[6.54], L319, V320, P321[7.31], L324[7.34], F328[7.38]                                                        |
| 2ycw_IC                                              | -13.3          | L78[2.41], T81[2.44], S82[2.45], C85[2.48], L123[3.34], I162[4.46], C163[4.47], W166[4.50], A170[4.54], F174[4.58]                        |
|                                                      | -12.7          | V52[1.43], L53[1.44], V56[1.47], A57[1.48], V60[1.51], L61[1.52], L356[8.57], L357[8.58]                                                  |
|                                                      | -12.2          | V51[1.42], I294[6.39], V298[6.43], A334[7.44], M338[7.48], I341[7.51], I342[7.52], R345[7.55]                                             |
|                                                      | -12.8          | I224[5.55], G293[6.38], I294[6.39], G297[6.42], T300[6.45], L301[6.46], L304[6.49], L308[6.53]                                            |
|                                                      | -12.3          | E130[3.41], C133[3.44], V134[3.45], I137[3.48], I161[4.45], V165[4.49], I168[4.52], V172[4.56], I214[5.45], P219[5.50]                    |
| Beta-1 adrenergic, inactive, antagonist, Turkey 2ycx |                |                                                                                                                                           |
| 2ycx_EC                                              | -13.7          | T300[6.45], L301[6.46], L304[6.49], P305[6.50], L308[6.53], V309[6.54], L319, V320, P321[7.31], L324[7.34], F328[7.38]                    |
|                                                      | -13.3          | W40[1.31], M44[1.35], M48[1.39], V51[1.42], A334[7.44], A337[7.47], M338[7.48], I341[7.51]                                                |
|                                                      | -12.9          | S45[1.36], V52[1.43], V56[1.47], L92[2.55], P96[2.59], A99[2.62], T100[2.63], V103[2.66], R104[2.67]                                      |
|                                                      | -12.7          | V172[4.56], P176[4.60], W181, N204[5.35], A206[5.37], Y207[5.38], A210[5.41], I214[5.45]                                                  |
|                                                      | -12.7          | Y217[5.48], L221[5.52], L304[6.49], L308[6.53], I311[6.56], V312[6.57], F315[6.60], L319                                                  |
| 2ycx_IC                                              | -13.8          | L78[2.41], T81[2.44], S82[2.45], C85[2.48], L123[3.34], K159[4.43], I162[4.46], C163[4.47], W166[4.50], A170[4.54], F174[4.58]            |
|                                                      | -13.7          | I224[5.55], G293[6.38], M296[6.41], G297[6.42], T300[6.45], L301[6.46], L304[6.49], L308[6.53]                                            |
|                                                      | -12.8          | I63[1.54], A64[1.55], G67[1.58], L88[2.51], V89[2.52], L92[2.55], L93[2.56], L120[3.31]                                                   |
|                                                      | -12.6          | V160[4.44], C163[4.47], T164[4.48], A167[4.51], A170[4.54], L171[4.55], F174[4.58], L175[4.59]                                            |
|                                                      | -11.9          | I294[6.39], V298[6.43], L301[6.46], F328[7.38], L331[7.41], M338[7.48], I342[7.52], R345[7.55]                                            |
| Beta-1 adrenergic, inactive, antagonist, Turkey 2ycy |                |                                                                                                                                           |
| 2ycy_EC                                              | -12.3          | M44[1.35], V298[6.43], L301[6.46], W323[7.33], A327[7.37], F328[7.38], L331[7.41], M338[7.48]                                             |
|                                                      | -14.9          | P176[4.60], W181, W182, N204[5.35], A206[5.37], Y207[5.38], A210[5.41], I214[5.45]                                                        |
| 2ycy_IC                                              | -14.3          | I224[5.55], A227[5.58], L228[5.59], Y231[5.62], G297[6.42], T300[6.45], L301[6.46], L304[6.49]                                            |
|                                                      | -13.6          | M44[1.35], L47[1.38], I294[6.39], V298[6.43], L331[7.41], M338[7.48], I341[7.51], I342[7.52], R345[7.55]                                  |
|                                                      | -13.4          | V52[1.43], V56[1.47], A57[1.48], V60[1.51], L61[1.52], L92[2.55], L356[8.57], L357[8.58]                                                  |
|                                                      | -13.3          | L78[2.41], T81[2.44], S82[2.45], C85[2.48], L116[3.27], L120[3.31], L123[3.34], I162[4.46], C163[4.47], W166[4.50], F174[4.58]            |
| Beta-1 adrenergic, inactive, antagonist, Turkey 2ycz |                |                                                                                                                                           |
| 2ycz_EC                                              | -15.6          | P176[4.60], W181, W182, N204[5.35], A206[5.37], Y207[5.38], A210[5.41], I214[5.45]                                                        |
|                                                      | -14.7          | V51[1.42], L54[1.45], W323[7.33], V326[7.36], A327[7.37], W330[7.40], A334[7.44], A337[7.47], M338[7.48], I341[7.51]                      |
|                                                      | -14.1          | E41[1.32], S45[1.36], M48[1.39], A49[1.40], V52[1.43], V56[1.47], L92[2.55], P96[2.59], A99[2.62], T100[2.63], V103[2.66]                 |
|                                                      | -12.1          | L301[6.46], P305[6.50], L308[6.53], V309[6.54], V312[6.57], L319, V320, L324[7.34], F328[7.38]                                            |
| 2ycz_IC                                              | -14.5          | M223[5.54], I224[5.55], A227[5.58], L228[5.59], Y231[5.62], G293[6.38], M296[6.41], G297[6.42], T300[6.45], L301[6.46], L304[6.49]        |
|                                                      | -13.9          | L78[2.41], T81[2.44], S82[2.45], C85[2.48], L120[3.31], L123[3.34], I162[4.46], C163[4.47], W166[4.50], F174[4.58]                        |
|                                                      | -13.0          | V52[1.43], L53[1.44], V56[1.47], A57[1.48], V60[1.51], L92[2.55], L356[8.57], L357[8.58]                                                  |
|                                                      | -12.5          | V51[1.42], I294[6.39], V298[6.43], A334[7.44], M338[7.48], I341[7.51], I342[7.52], R345[7.55]                                             |
| Beta-1 adrenergic, inactive, agonist, Turkey 3zpq    |                |                                                                                                                                           |
| 3zpq_EC                                              | -14.0          | I168[4.52], L171[4.55], V172[4.56], P176[4.60], W181, N204[5.35], A206[5.37], Y207[5.38], A210[5.41], I214[5.45]                          |
|                                                      | -13.8          | M44[1.35], L47[1.38], M48[1.39], V51[1.42], L54[1.45], V102[2.65], V326[7.36], A327[7.37], W330[7.40], A334[7.44], A337[7.47], M338[7.48] |
|                                                      | -13.3          | S45[1.36], A49[1.40], V52[1.43], L53[1.44], V56[1.47], P96[2.59], A99[2.62], T100[2.63], V103[2.66], R104[2.67]                           |
|                                                      | -12.8          | Y217[5.48], L220[5.51], L221[5.52], L308[6.53], I311[6.56], V312[6.57], F315[6.60], L319                                                  |
| 3zpq_IC                                              | -13.9          | V52[1.43], L53[1.44], V56[1.47], A57[1.48], V60[1.51], L61[1.52], L92[2.55], P96[2.59], L356[8.57], L357[8.58], A358[8.59]                |
|                                                      | -13.2          | L78[2.41], T81[2.44], S82[2.45], C85[2.48], L123[3.34], I162[4.46], C163[4.47], W166[4.50], A170[4.54], F174[4.58]                        |

| PDB <sup>a</sup>                                  | E <sup>b</sup> | Local Residues <sup>c</sup>                                                                                                                                      |
|---------------------------------------------------|----------------|------------------------------------------------------------------------------------------------------------------------------------------------------------------|
|                                                   | -12.3          | E130[3.41], C133[3.44], V134[3.45], I137[3.48], I161[4.45], V165[4.49], I168[4.52], V172[4.56], I214[5.45]                                                       |
| Beta-1 adrenergic, inactive, agonist, Turkey 3zpr |                |                                                                                                                                                                  |
| 3zpr_EC                                           | -16.0          | V172[4.56], P176[4.60], W181, W182, N204[5.35], A206[5.37], Y207[5.38], A210[5.41], I214[5.45]                                                                   |
|                                                   | -13.7          | W40[1.31], M44[1.35], L47[1.38], M48[1.39], V51[1.42], L54[1.45], V102[2.65], V326[7.36], A327[7.37], W330[7.40], L331[7.41], A334[7.44], A337[7.47], M338[7.48] |
|                                                   | -13.3          | S45[1.36], M48[1.39], A49[1.40], V52[1.43], L53[1.44], V56[1.47], P96[2.59], A99[2.62], T100[2.63], V103[2.66], R104[2.67]                                       |
|                                                   | -12.7          | Y217[5.48], L220[5.51], L221[5.52], L304[6.49], L308[6.53], I311[6.56], V312[6.57], F315[6.60], N316[6.61], L319                                                 |
| 3zpr_IC                                           | -14.0          | V52[1.43], L53[1.44], V56[1.47], A57[1.48], V60[1.51], L61[1.52], L92[2.55], P96[2.59], L356[8.57], L357[8.58]                                                   |
|                                                   | -13.3          | L78[2.41], T81[2.44], S82[2.45], C85[2.48], L123[3.34], K159[4.43], I162[4.46], C163[4.47], W166[4.50], A170[4.54], F174[4.58]                                   |
|                                                   | -12.4          | E130[3.41], C133[3.44], V134[3.45], I137[3.48], I161[4.45], V165[4.49], I168[4.52], V172[4.56], I214[5.45]                                                       |
| Beta-1 adrenergic, inactive, agonist, Turkey 4ami |                |                                                                                                                                                                  |
| 4ami_EC                                           | -17.2          | P176[4.60], W181, W182, N204[5.35], A206[5.37], Y207[5.38], A210[5.41], I214[5.45]                                                                               |
|                                                   | -13.6          | E41[1.32], S45[1.36], A49[1.40], V52[1.43], V56[1.47], L92[2.55], P96[2.59], A99[2.62], T100[2.63], V103[2.66]                                                   |
|                                                   | -13.6          | W40[1.31], M44[1.35], L47[1.38], M48[1.39], V51[1.42], L54[1.45], V102[2.65], A327[7.37], W330[7.40], A334[7.44], A337[7.47], M338[7.48], I341[7.51]             |
|                                                   | -13.2          | L301[6.46], P305[6.50], L308[6.53], V309[6.54], V312[6.57], L319, V320, P321[7.31], L324[7.34], F328[7.38]                                                       |
| 4ami_IC                                           | -13.6          | V52[1.43], L53[1.44], V56[1.47], A57[1.48], V60[1.51], L61[1.52], L356[8.57], L357[8.58]                                                                         |
|                                                   | -13.1          | L78[2.41], T81[2.44], S82[2.45], C85[2.48], L123[3.34], I162[4.46], C163[4.47], W166[4.50], A170[4.54], F174[4.58]                                               |
|                                                   | -12.9          | I224[5.55], A227[5.58], L228[5.59], G293[6.38], I294[6.39], M296[6.41], G297[6.42], T300[6.45], L304[6.49], L308[6.53]                                           |
|                                                   | -12.4          | L46[1.37], A49[1.40], L50[1.41], L53[1.44], L54[1.45], A57[1.48], G58[1.49], L61[1.52], F353[8.54], L357[8.58]                                                   |
|                                                   | -12.1          | V134[3.45], I137[3.48], I161[4.45], T164[4.48], V165[4.49], I168[4.52], I214[5.45], I218[5.49]                                                                   |
| Beta-1 adrenergic, inactive, agonist, Turkey 4amj |                |                                                                                                                                                                  |
| 4amj_EC                                           | -17.0          | V172[4.56], P176[4.60], W181, W182, N204[5.35], A206[5.37], Y207[5.38], A210[5.41], I214[5.45]                                                                   |
|                                                   | -14.0          | W40[1.31], M44[1.35], L47[1.38], M48[1.39], V51[1.42], V102[2.65], W330[7.40], A334[7.44], A337[7.47], M338[7.48]                                                |
|                                                   | -13.2          | S45[1.36], A49[1.40], V52[1.43], V56[1.47], L92[2.55], P96[2.59], A99[2.62], T100[2.63], V103[2.66], R104[2.67]                                                  |
|                                                   | -12.6          | Y217[5.48], L220[5.51], L221[5.52], L304[6.49], L308[6.53], I311[6.56], V312[6.57], F315[6.60], N316[6.61], L319                                                 |
| 4amj_IC                                           | -13.7          | V52[1.43], L53[1.44], V56[1.47], A57[1.48], V60[1.51], L92[2.55], L356[8.57], L357[8.58], A358[8.59]                                                             |
|                                                   | -13.1          | I224[5.55], A227[5.58], G293[6.38], M296[6.41], G297[6.42], T300[6.45], L301[6.46], L304[6.49], L308[6.53]                                                       |
|                                                   | -13.0          | L78[2.41], T81[2.44], S82[2.45], C85[2.48], L116[3.27], L120[3.31], K159[4.43], I162[4.46], W166[4.50], F174[4.58]                                               |
|                                                   | -12.9          | L46[1.37], A49[1.40], L50[1.41], L53[1.44], L54[1.45], A57[1.48], G58[1.49], L61[1.52], C344[7.54], F353[8.54], L357[8.58]                                       |
|                                                   | -12.8          | E130[3.41], C133[3.44], V134[3.45], I137[3.48], I161[4.45], I168[4.52], V172[4.56], I214[5.45]                                                                   |
|                                                   | -12.4          | I294[6.39], V298[6.43], L301[6.46], F328[7.38], L331[7.41], M338[7.48], I341[7.51], I342[7.52], R345[7.55]                                                       |
| Beta-1 adrenergic, inactive, Turkey 4gpo          |                |                                                                                                                                                                  |
| 4gpo_EC                                           | -14.4          | L47[1.38], L50[1.41], V51[1.42], L54[1.45], W323[7.33], V326[7.36], A327[7.37], W330[7.40]                                                                       |
|                                                   | -13.1          | S45[1.36], A49[1.40], V52[1.43], L53[1.44], V56[1.47], P96[2.59], A99[2.62], T100[2.63], V103[2.66]                                                              |
|                                                   | -12.9          | L301[6.46], P305[6.50], L308[6.53], V309[6.54], V312[6.57], L319, V320, L324[7.34], F328[7.38]                                                                   |
|                                                   | -12.4          | V89[2.52], L116[3.27], L120[3.31], L123[3.34], W166[4.50], A170[4.54], F174[4.58], M178[4.62]                                                                    |
|                                                   | -12.0          | Y217[5.48], L221[5.52], I224[5.55], L308[6.53], I311[6.56], V312[6.57], F315[6.60], N316[6.61]                                                                   |
| 4gpo_IC                                           | -13.1          | L78[2.41], T81[2.44], S82[2.45], C85[2.48], L93[2.56], L120[3.31], K159[4.43], I162[4.46], C163[4.47], W166[4.50]                                                |
|                                                   | -12.9          | L220[5.51], I224[5.55], A227[5.58], L228[5.59], Y231[5.62], G293[6.38], M296[6.41], G297[6.42], T300[6.45], L304[6.49], L308[6.53]                               |
|                                                   | -12.7          | C133[3.44], V134[3.45], I137[3.48], M153, I161[4.45], I213[5.44], I214[5.45], I218[5.49]                                                                         |
|                                                   | -12.3          | L47[1.38], L50[1.41], V51[1.42], L54[1.45], I294[6.39], A334[7.44], M338[7.48], I341[7.51], I342[7.52]                                                           |
|                                                   | -12.0          | A49[1.40], V52[1.43], L53[1.44], V56[1.47], A57[1.48], V60[1.51], L61[1.52], A64[1.55], L356[8.57]                                                               |

| PDB <sup>a</sup>                                                                 | E <sup>b</sup> | Local Residues <sup>c</sup>                                                                                                        |
|----------------------------------------------------------------------------------|----------------|------------------------------------------------------------------------------------------------------------------------------------|
| <b>Beta-1 adrenergic, inactive, inverse agonist, Turkey 5a8e</b>                 |                |                                                                                                                                    |
| 5a8e_EC                                                                          | -15.9          | S45[1.36], M48[1.39], A49[1.40], V52[1.43], L53[1.44], V56[1.47], A99[2.62], T100[2.63], V103[2.66], R104[2.67]                    |
|                                                                                  | -14.1          | W40[1.31], M44[1.35], L47[1.38], M48[1.39], V51[1.42], V102[2.65], W323[7.33], V326[7.36], A327[7.37], W330[7.40], A334[7.44]      |
|                                                                                  | -14.0          | Q38[1.29], E41[1.32], A42[1.33], S45[1.36], L46[1.37], A49[1.40], L53[1.44], R104[2.67]                                            |
|                                                                                  | -13.7          | I168[4.52], V172[4.56], P176[4.60], W181, N204[5.35], A206[5.37], Y207[5.38], I214[5.45]                                           |
|                                                                                  | -12.3          | Y217[5.48], L220[5.51], L221[5.52], L304[6.49], L308[6.53], I311[6.56], V312[6.57], F315[6.60]                                     |
|                                                                                  | -12.0          | L304[6.49], P305[6.50], L308[6.53], V309[6.54], V312[6.57], L319, L324[7.34], F328[7.38]                                           |
| 5a8e_IC                                                                          | -15.2          | L78[2.41], F79[2.42], T81[2.44], S82[2.45], C85[2.48], K159[4.43], I162[4.46], C163[4.47], W166[4.50]                              |
|                                                                                  | -12.7          | L47[1.38], V51[1.42], L54[1.45], W330[7.40], A334[7.44], M338[7.48], I341[7.51], R345[7.55]                                        |
| <b>Adrenergic beta-2 receptor</b>                                                |                |                                                                                                                                    |
| <b>Beta-2 adrenergic receptor, active state, Human 3p0g</b>                      |                |                                                                                                                                    |
| 3p0g_EC                                                                          | -14.9          | M156[4.48], V160[4.52], L163[4.55], P168[4.60], W173, Y174, N196[5.35], Y199[5.38], A202[5.41], V206[5.45]                         |
|                                                                                  | -13.8          | G280[6.42], T283[6.45], L284[6.46], L287[6.49], P288[6.50], I291[6.53], V292[6.54], V295[6.57], L302, I303, V307[7.34], L311[7.38] |
|                                                                                  | -13.4          | S41[1.40], V44[1.43], L45[1.44], V48[1.47], L84[2.55], P88[2.59], A91[2.62], A92[2.63], L95[2.66], M96[2.67]                       |
|                                                                                  | -13.1          | W32[1.31], M36[1.35], V39[1.38], M40[1.39], I43[1.42], I94[2.65], I309[7.36], L310[7.37], W313[7.40], V317[7.44], F321[7.48]       |
|                                                                                  | -13.0          | I201[5.40], I205[5.44], Y209[5.48], L212[5.51], V213[5.52], V216[5.55], I294[6.56], V297[6.59], I298[6.60]                         |
|                                                                                  | -12.9          | L155[4.47], W158[4.50], I159[4.51], G162[4.54], F166[4.58], L167[4.59], Q170[4.62], M171[4.63]                                     |
|                                                                                  | -12.2          | E30[1.29], V33[1.32], V34[1.33], G37[1.36], I38[1.37], S41[1.40], L45[1.44], L95[2.66]                                             |
| 3p0g_IC                                                                          | -14.6          | V216[5.55], Y219[5.58], S220[5.59], F223[5.62], M279[6.41], T283[6.45], L287[6.49], I291[6.53]                                     |
|                                                                                  | -14.1          | Y70[2.41], C77[2.48], V81[2.52], A85[2.56], F108[3.27], I112[3.31], L115[3.34], I154[4.46], W158[4.50], F166[4.58]                 |
|                                                                                  | -14.0          | V52[1.51], I55[1.54], T56[1.55], A59[1.58], L80[2.51], V81[2.52], L84[2.55], A85[2.56], W105[3.24]                                 |
|                                                                                  | -13.7          | Y70[2.41], L115[3.34], R151[4.43], I154[4.46], L155[4.47], W158[4.50], G162[4.54], F166[4.58]                                      |
|                                                                                  | -13.4          | C125[3.44], V126[3.45], V129[3.48], D130[3.49], L145, I153[4.45], M156[4.48], V160[4.52], V206[5.45], V210[5.49], I214[5.53]       |
| <b>Beta-2 adrenergic receptor, active state, Human 3sn6</b>                      |                |                                                                                                                                    |
| 3sn6_EC                                                                          | -22.8          | M156[4.48], V160[4.52], L163[4.55], T164[4.56], P168[4.60], W173, Y174, N196[5.35], A198[5.37], Y199[5.38], A202[5.41], V206[5.45] |
|                                                                                  | -21.6          | T283[6.45], L284[6.46], L287[6.49], P288[6.50], I291[6.53], V292[6.54], V295[6.57], L302, I303                                     |
|                                                                                  | -21.5          | Y209[5.48], L212[5.51], V213[5.52], V216[5.55], I291[6.53], I294[6.56], V295[6.57], I298[6.60], Q299[6.61], L302                   |
|                                                                                  | -21.0          | L284[6.46], P288[6.50], V292[6.54], L302, I303, R304[7.31], V307[7.34], L311[7.38], I314[7.41]                                     |
|                                                                                  | -20.6          | V44[1.43], L45[1.44], V48[1.47], P88[2.59], A92[2.63], L95[2.66], T96[2.67], F101                                                  |
|                                                                                  | -21.7          | Q197[5.36], I201[5.40], I205[5.44], Y209[5.48], V213[5.52], I294[6.56], V297[6.59], I298[6.60]                                     |
| 3sn6_IC                                                                          | -23.0          | V216[5.55], Y219[5.58], S220[5.59], F223[5.62], L275[6.37], M279[6.41], T283[6.45], L287[6.49]                                     |
|                                                                                  | -22.3          | Y70[2.41], T73[2.44], S74[2.45], C77[2.48], L115[3.34], R151[4.43], I154[4.46], L155[4.47], W158[4.50], F166[4.58]                 |
|                                                                                  | -21.8          | Y209[5.48], L212[5.51], V216[5.55], L272[6.34], L275[6.37], G276[6.38], M279[6.41], G280[6.42], T283[6.45], L287[6.49], I291[6.53] |
|                                                                                  | -21.6          | F71[2.42], E122[3.41], C125[3.44], V126[3.45], V129[3.48], I153[4.45], I205[5.44], V206[5.45], V210[5.49], I214[5.53]              |
|                                                                                  | -22.1          | V129[3.48], Y132[3.51], F133[3.52], I205[5.44], V210[5.49], V213[5.52], I214[5.53], F217[5.56], V218[5.57]                         |
|                                                                                  | -21.1          | I55[1.54], T73[2.44], C77[2.48], L80[2.51], V81[2.52], L84[2.55], A85[2.56], F108[3.27], I112[3.31]                                |
| <b>Beta-2 adrenergic receptor, active state, Human, residues renumbered 6mxt</b> |                |                                                                                                                                    |
| 6mxt_EC                                                                          | -16.4          | L163[4.55], P168[4.60], W173, Y174, N196[5.35], A198[5.37], Y199[5.38], A202[5.41]                                                 |
|                                                                                  | -14.3          | T283[6.45], L284[6.46], L287[6.49], P288[6.50], I291[6.53], V292[6.54], L302, I303, R304[7.31], V307[7.34], L311[7.38]             |
|                                                                                  | -13.9          | Y209[5.48], L212[5.51], V213[5.52], I291[6.53], I294[6.56], V295[6.57], I298[6.60], Q299[6.61], L302                               |
|                                                                                  | -12.9          | L155[4.47], W158[4.50], I159[4.51], G162[4.54], F166[4.58], L167[4.59], Q170[4.62], M171[4.63]                                     |
|                                                                                  | -12.8          | S41[1.40], V44[1.43], L45[1.44], V48[1.47], L84[2.55], P88[2.59], A92[2.63], L95[2.66], T96[2.67]                                  |

| PDB <sup>a</sup>                                                         | E <sup>b</sup> | Local Residues <sup>c</sup>                                                                                                                                       |
|--------------------------------------------------------------------------|----------------|-------------------------------------------------------------------------------------------------------------------------------------------------------------------|
| 6mxt_IC                                                                  | -14.0          | Y70[2.41], R151[4.43], I154[4.46], L155[4.47], W158[4.50], I159[4.51], G162[4.54], F166[4.58]                                                                     |
|                                                                          | -13.5          | V39[1.38], L42[1.41], I43[1.42], A46[1.45], L310[7.37], W313[7.40], I314[7.41], V317[7.44], G320[7.47], F321[7.48], L324[7.51]                                    |
|                                                                          | -13.1          | E122[3.41], C125[3.44], V126[3.45], V129[3.48], I153[4.45], I205[5.44], V206[5.45], V210[5.49], P211[5.50], I214[5.53]                                            |
|                                                                          | -13.1          | V52[1.51], I55[1.54], T56[1.55], L80[2.51], V81[2.52], L84[2.55], A85[2.56], F108[3.27], I112[3.31]                                                               |
|                                                                          | -15.7          | Y70[2.41], T73[2.44], S74[2.45], C77[2.48], V81[2.52], F108[3.27], I154[4.46], W158[4.50]                                                                         |
|                                                                          | -12.5          | G276[6.38], I277[6.39], M279[6.41], G280[6.42], T283[6.45], L284[6.46], L287[6.49], I291[6.53]                                                                    |
|                                                                          | -12.4          | V44[1.43], L45[1.44], V48[1.47], F49[1.48], V52[1.51], L53[1.52], T56[1.55], L84[2.55], P88[2.59], L339[8.57]                                                     |
| Beta-2 adrenergic receptor, inactive state, with cholesterol, Human 2rh1 |                |                                                                                                                                                                   |
| 2rh1_EC                                                                  | -13.1          | L155[4.47], W158[4.50], I159[4.51], G162[4.54], L163[4.55], F166[4.58], L167[4.59], Q170[4.62], M171[4.63]                                                        |
|                                                                          | -13.0          | S41[1.40], V44[1.43], V48[1.47], L84[2.55], P88[2.59], A91[2.62], A92[2.63], L95[2.66], M96[2.67]                                                                 |
|                                                                          | -12.8          | W32[1.31], M36[1.35], M40[1.39], I43[1.42], I94[2.65], I309[7.36], L310[7.37], W313[7.40], V317[7.44]                                                             |
| 2rh1_IC                                                                  | -14.5          | Y70[2.41], C77[2.48], V81[2.52], F108[3.27], I112[3.31], L115[3.34], R151[4.43], I154[4.46], W158[4.50], F166[4.58]                                               |
|                                                                          | -14.3          | V44[1.43], L45[1.44], V48[1.47], F49[1.48], V52[1.51], L53[1.52], L84[2.55], L339[8.57], L340[8.58], C341[8.59]                                                   |
|                                                                          | -13.4          | I43[1.42], A46[1.45], F49[1.48], G50[1.49], L53[1.52], V317[7.44], G320[7.47], P323[7.50], L324[7.51], F336[8.54], L340[8.58]                                     |
|                                                                          | -13.4          | I55[1.54], A59[1.58], T73[2.44], C77[2.48], L80[2.51], V81[2.52], L84[2.55], A85[2.56]                                                                            |
|                                                                          | -12.4          | I277[6.39], T281[6.43], L284[6.46], C285[6.47], P288[6.50], I314[7.41], F321[7.48], L324[7.51], I325[7.52], C327[7.54], R328[7.55]                                |
| Beta-2 adrenergic receptor, inactive state, with cholesterol, Human 3d4s |                |                                                                                                                                                                   |
| 3d4s_EC                                                                  | -17.1          | T164[4.56], P168[4.60], W173, Y174, N196[5.35], A198[5.37], Y199[5.38], A202[5.41], V206[5.45]                                                                    |
|                                                                          | -13.8          | Y209[5.48], L212[5.51], V213[5.52], L287[6.49], I291[6.53], I294[6.56], V295[6.57], I298[6.60], Q299[6.61]                                                        |
|                                                                          | -12.8          | M36[1.35], V39[1.38], M40[1.39], I43[1.42], I94[2.65], E306[7.33], I309[7.36], L310[7.37], W313[7.40], V317[7.44]                                                 |
|                                                                          | -12.7          | S41[1.40], V44[1.43], L45[1.44], V48[1.47], L84[2.55], P88[2.59], A91[2.62], A92[2.63], L95[2.66]                                                                 |
|                                                                          | -12.5          | W32[1.31], M36[1.35], V39[1.38], I43[1.42], V317[7.44], G320[7.47], F321[7.48], L324[7.51]                                                                        |
|                                                                          | -12.3          | L284[6.46], L287[6.49], P288[6.50], I291[6.53], V292[6.54], V295[6.57], L302, I303                                                                                |
|                                                                          | -12.7          | T281[6.43], L284[6.46], C285[6.47], P288[6.50], R304[7.31], V307[7.34], L310[7.37], L311[7.38], I314[7.41]                                                        |
| 3d4s_IC                                                                  | -14.5          | Y70[2.41], T73[2.44], S74[2.45], C77[2.48], V81[2.52], F108[3.27], I112[3.31], L115[3.34], R151[4.43], I154[4.46], L155[4.47], W158[4.50], F166[4.58]             |
|                                                                          | -13.3          | V44[1.43], L45[1.44], V48[1.47], F49[1.48], V52[1.51], L53[1.52], T56[1.55], L339[8.57]                                                                           |
|                                                                          | -13.0          | I43[1.42], A46[1.45], F49[1.48], G50[1.49], L53[1.52], V317[7.44], G320[7.47], P323[7.50], L324[7.51], F336[8.54], Q337[8.55], L340[8.58], L342                   |
|                                                                          | -13.0          | I55[1.54], A59[1.58], T73[2.44], C77[2.48], L80[2.51], V81[2.52], L84[2.55], A85[2.56]                                                                            |
| Beta-2 adrenergic receptor, inactive state, with cholesterol, Human 3ny8 |                |                                                                                                                                                                   |
| 3ny8_EC                                                                  | -13.8          | T281[6.43], L284[6.46], C285[6.47], P288[6.50], R304[7.31], V307[7.34], L310[7.37], L311[7.38], I314[7.41]                                                        |
|                                                                          | -13.7          | T164[4.56], P168[4.60], W173, N196[5.35], A198[5.37], Y199[5.38], A202[5.41], V206[5.45]                                                                          |
|                                                                          | -13.7          | T283[6.45], L284[6.46], L287[6.49], P288[6.50], V292[6.54], R304[7.31], V307[7.34], L311[7.38]                                                                    |
|                                                                          | -13.4          | F108[3.27], W158[4.50], I159[4.51], G162[4.54], L163[4.55], F166[4.58], L167[4.59], Q170[4.62]                                                                    |
|                                                                          | -13.2          | M36[1.35], M40[1.39], I94[2.65], I309[7.36], L310[7.37], W313[7.40], I314[7.41], V317[7.44], F321[7.48]                                                           |
|                                                                          | -13.0          | S41[1.40], V44[1.43], L45[1.44], V48[1.47], P88[2.59], A91[2.62], A92[2.63], L95[2.66]                                                                            |
|                                                                          | -12.4          | Y209[5.48], L212[5.51], V213[5.52], L287[6.49], I291[6.53], I294[6.56], V295[6.57], I298[6.60]                                                                    |
| 3ny8_IC                                                                  | -14.6          | Y70[2.41], T73[2.44], S74[2.45], C77[2.48], V81[2.52], F108[3.27], I112[3.31], L115[3.34], A150[4.42], R151[4.43], I154[4.46], L155[4.47], W158[4.50], F166[4.58] |
|                                                                          | -14.5          | L45[1.44], V48[1.47], F49[1.48], V52[1.51], L53[1.52], T56[1.55], L84[2.55], L339[8.57], L340[8.58], C341[8.59]                                                   |
|                                                                          | -13.3          | I43[1.42], A46[1.45], F49[1.48], G50[1.49], L53[1.52], V317[7.44], G320[7.47], P323[7.50], L324[7.51], F336[8.54], L340[8.58], L342                               |
|                                                                          | -13.1          | I55[1.54], A59[1.58], T73[2.44], C77[2.48], L80[2.51], V81[2.52], L84[2.55], A85[2.56]                                                                            |
|                                                                          | -12.8          | F223[5.62], K273[6.35], G276[6.38], I277[6.39], G280[6.42], T283[6.45], L284[6.46], L287[6.49], I291[6.53]                                                        |
|                                                                          | -12.8          | I277[6.39], T281[6.43], L284[6.46], I314[7.41], F321[7.48], L324[7.51], I325[7.52], R328[7.55]                                                                    |

| PDB <sup>a</sup>                                                         | E <sup>b</sup> | Local Residues <sup>c</sup>                                                                                                                           |
|--------------------------------------------------------------------------|----------------|-------------------------------------------------------------------------------------------------------------------------------------------------------|
|                                                                          | -12.6          | Y209[5.48], V213[5.52], V216[5.55], F217[5.56], S220[5.59], Q224[5.63], L287[6.49], I291[6.53]                                                        |
| Beta-2 adrenergic receptor, inactive state, with cholesterol, Human 3ny9 |                |                                                                                                                                                       |
| 3ny9_EC                                                                  | -15.4          | T164[4.56], P168[4.60], W173, Y174, N196[5.35], A198[5.37], Y199[5.38], A202[5.41], V206[5.45]                                                        |
|                                                                          | -13.9          | M36[1.35], V39[1.38], M40[1.39], I43[1.42], I94[2.65], E306[7.33], I309[7.36], L310[7.37], W313[7.40], V317[7.44], F321[7.48]                         |
|                                                                          | -13.6          | L284[6.46], L287[6.49], P288[6.50], I291[6.53], V292[6.54], L302, I303, R304[7.31], V307[7.34], L311[7.38]                                            |
|                                                                          | -13.4          | S41[1.40], V44[1.43], L45[1.44], V48[1.47], L84[2.55], P88[2.59], A91[2.62], A92[2.63], L95[2.66], M96[2.67]                                          |
|                                                                          | -13.1          | F108[3.27], W158[4.50], I159[4.51], G162[4.54], L163[4.55], F166[4.58], L167[4.59], Q170[4.62]                                                        |
| 3ny9_IC                                                                  | -14.1          | Y209[5.48], V213[5.52], V216[5.55], F217[5.56], S220[5.59], L287[6.49], I291[6.53], I294[6.56]                                                        |
|                                                                          | -13.6          | Y70[2.41], T73[2.44], S74[2.45], C77[2.48], V81[2.52], F108[3.27], I112[3.31], L115[3.34], I154[4.46], L155[4.47], W158[4.50], F166[4.58]             |
|                                                                          | -12.9          | L45[1.44], V48[1.47], F49[1.48], V52[1.51], L53[1.52], L84[2.55], L339[8.57], L340[8.58]                                                              |
|                                                                          | -12.6          | I55[1.54], A59[1.58], C77[2.48], L80[2.51], V81[2.52], A85[2.56], W105[3.24], I112[3.31]                                                              |
|                                                                          | -12.5          | I277[6.39], T281[6.43], L284[6.46], C285[6.47], I314[7.41], F321[7.48], L324[7.51], I325[7.52]                                                        |
| Beta-2 adrenergic receptor, inactive state, with cholesterol, Human 3nya |                |                                                                                                                                                       |
| 3nya_EC                                                                  | -17.2          | T164[4.56], P168[4.60], W173, Y174, N196[5.35], A198[5.37], Y199[5.38], A202[5.41], V206[5.45]                                                        |
|                                                                          | -14.1          | M36[1.35], V39[1.38], M40[1.39], I43[1.42], I94[2.65], E306[7.33], I309[7.36], L310[7.37], W313[7.40], V317[7.44]                                     |
|                                                                          | -13.4          | L284[6.46], L287[6.49], P288[6.50], I291[6.53], V292[6.54], V295[6.57], L302, I303, V307[7.34]                                                        |
|                                                                          | -13.3          | F104[3.23], F108[3.27], W158[4.50], I159[4.51], G162[4.54], F166[4.58], Q170[4.62], M171[4.63]                                                        |
|                                                                          | -13.1          | Y209[5.48], L212[5.51], L287[6.49], I291[6.53], I294[6.56], V295[6.57], I298[6.60], Q299[6.61]                                                        |
|                                                                          | -12.9          | S41[1.40], V44[1.43], L45[1.44], V48[1.47], L84[2.55], P88[2.59], A91[2.62], A92[2.63], L95[2.66]                                                     |
| 3nya_IC                                                                  | -13.4          | V39[1.38], I43[1.42], A46[1.45], F49[1.48], L53[1.52], V317[7.44], G320[7.47], F321[7.48], P323[7.50], L324[7.51], C327[7.54], F336[8.54], L340[8.58] |
|                                                                          | -13.4          | T73[2.44], S74[2.45], C77[2.48], F108[3.27], L115[3.34], R151[4.43], I154[4.46], L155[4.47], W158[4.50], F166[4.58]                                   |
|                                                                          | -12.9          | I277[6.39], T281[6.43], L284[6.46], C285[6.47], P288[6.50], L311[7.38], I314[7.41], F321[7.48], I325[7.52], R328[7.55]                                |
|                                                                          | -12.9          | I55[1.54], A59[1.58], C77[2.48], L80[2.51], V81[2.52], A85[2.56], W105[3.24], F108[3.27], I112[3.31]                                                  |
|                                                                          | -12.7          | V44[1.43], L45[1.44], V48[1.47], F49[1.48], V52[1.51], L53[1.52], T56[1.55], L339[8.57]                                                               |
| Beta-2 adrenergic receptor, inactive state, with cholesterol, Human 3pds |                |                                                                                                                                                       |
| 3pds_EC                                                                  | -12.8          | L163[4.55], T164[4.56], P168[4.60], W173, N196[5.35], Y199[5.38], A202[5.41], V206[5.45]                                                              |
|                                                                          | -12.5          | V44[1.43], L45[1.44], V48[1.47], F49[1.48], P88[2.59], A92[2.63], M96[2.67], F101                                                                     |
| 3pds_IC                                                                  | -14.1          | Y70[2.41], T73[2.44], S74[2.45], C77[2.48], V81[2.52], I112[3.31], L115[3.34], R151[4.43], I154[4.46], L155[4.47], W158[4.50], F166[4.58]             |
|                                                                          | -13.0          | C125[3.44], V126[3.45], V129[3.48], D130[3.49], L145, I153[4.45], I205[5.44], V206[5.45], V210[5.49], I214[5.53]                                      |
|                                                                          | -12.8          | I55[1.54], A59[1.58], T73[2.44], C77[2.48], L80[2.51], V81[2.52], L84[2.55], A85[2.56]                                                                |
|                                                                          | -12.5          | I277[6.39], T281[6.43], L284[6.46], C285[6.47], P288[6.50], I314[7.41], F321[7.48], I325[7.52], R328[7.55]                                            |
| Beta-2 adrenergic receptor, inactive state, with cholesterol, Human 5d5a |                |                                                                                                                                                       |
| 5d5a_EC                                                                  | -16.0          | V160[4.52], L163[4.55], T164[4.56], P168[4.60], W173, Y174, N196[5.35], A198[5.37], Y199[5.38], A202[5.41], S203[5.42], V206[5.45]                    |
|                                                                          | -13.0          | S41[1.40], V44[1.43], L45[1.44], V48[1.47], L84[2.55], P88[2.59], A91[2.62], A92[2.63], L95[2.66], M96[2.67]                                          |
|                                                                          | -12.6          | W32[1.31], M36[1.35], V39[1.38], I43[1.42], E306[7.33], L310[7.37], W313[7.40], V317[7.44]                                                            |
|                                                                          | -12.6          | L212[5.51], L287[6.49], I291[6.53], I294[6.56], V295[6.57], I298[6.60], Q299[6.61], L302                                                              |
|                                                                          | -12.3          | L115[3.34], W158[4.50], I159[4.51], G162[4.54], F166[4.58], L167[4.59], Q170[4.62], M171[4.63]                                                        |
| 5d5a_IC                                                                  | -14.6          | Y70[2.41], T73[2.44], S74[2.45], I112[3.31], L115[3.34], R151[4.43], I154[4.46], L155[4.47], W158[4.50], F166[4.58]                                   |
|                                                                          | -13.7          | V44[1.43], L45[1.44], V48[1.47], F49[1.48], V52[1.51], L53[1.52], L339[8.57], L340[8.58]                                                              |
|                                                                          | -12.9          | C125[3.44], V126[3.45], V129[3.48], D130[3.49], L145, I153[4.45], V206[5.45], V210[5.49], P211[5.50], I214[5.53]                                      |
|                                                                          | -12.7          | V216[5.55], Y219[5.58], F223[5.62], G276[6.38], M279[6.41], G280[6.42], T283[6.45], L284[6.46], L287[6.49], I291[6.53]                                |
|                                                                          | -12.7          | I55[1.54], A59[1.58], T73[2.44], C77[2.48], L80[2.51], V81[2.52], A85[2.56], W105[3.24], F108[3.27], I112[3.31]                                       |
|                                                                          | -13.1          | Y209[5.48], V213[5.52], V216[5.55], F217[5.56], S220[5.59], Q224[5.63], I291[6.53], I294[6.56]                                                        |
| Beta-2 adrenergic receptor, inactive state, with cholesterol, Human 5x7d |                |                                                                                                                                                       |
| 5x7d_EC                                                                  | -14.2          | M36[1.35], V39[1.38], M40[1.39], I43[1.42], I94[2.65], K305[7.32], E306[7.33], I309[7.36], L310[7.37], W313[7.40]                                     |



| PDB <sup>a</sup>                                                | E <sup>b</sup> | Local Residues <sup>c</sup>                                                                                                                           |
|-----------------------------------------------------------------|----------------|-------------------------------------------------------------------------------------------------------------------------------------------------------|
|                                                                 | -14.1          | V160[4.52], T164[4.56], P168[4.60], W173, Y199[5.38], A202[5.41], S203[5.42], V206[5.45]                                                              |
|                                                                 | -13.1          | L284[6.46], L287[6.49], P288[6.50], I291[6.53], V292[6.54], L302, I303, R304[7.31], V307[7.34], L311[7.38]                                            |
|                                                                 | -12.3          | L155[4.47], W158[4.50], I159[4.51], G162[4.54], L163[4.55], F166[4.58], L167[4.59], Q170[4.62], M171[4.63]                                            |
| 5x7d_IC                                                         | -14.4          | Y70[2.41], T73[2.44], S74[2.45], C77[2.48], V81[2.52], F108[3.27], I112[3.31], L115[3.34], R151[4.43], I154[4.46], L155[4.47], W158[4.50], F166[4.58] |
|                                                                 | -13.7          | Y209[5.48], V213[5.52], V216[5.55], F217[5.56], S220[5.59], L287[6.49], I291[6.53], I294[6.56]                                                        |
|                                                                 | -13.1          | E122[3.41], C125[3.44], V126[3.45], V129[3.48], D130[3.49], I153[4.45], V160[4.52], T164[4.56], V206[5.45], P211[5.50]                                |
|                                                                 | -13.1          | V39[1.38], L42[1.41], I43[1.42], A46[1.45], F49[1.48], L310[7.37], V317[7.44], G320[7.47], F321[7.48], L324[7.51]                                     |
|                                                                 | -12.6          | V52[1.51], I55[1.54], T56[1.55], A59[1.58], L80[2.51], V81[2.52], L84[2.55], A85[2.56], W105[3.24], F108[3.27], I112[3.31]                            |
| Angiotensin II receptor Type 1 (AT1)                            |                |                                                                                                                                                       |
| Angiotensin receptor Type II AT1, inactive, Human 4yay          |                |                                                                                                                                                       |
| 4yay_EC                                                         | -14.7          | L155[4.52], L158[4.55], A159[4.56], L161[4.58], P162[4.59], I165[4.62], H166[4.63], E185, L195[5.38]                                                  |
|                                                                 | -12.6          | Y26[1.30], P255[6.50], R275[7.26], I279[7.30], T282[7.33], A283[7.34], I286[7.37], I290[7.41]                                                         |
| 4yay_IC                                                         | -14.3          | V40[1.44], F44[1.48], G45[1.49], L48[1.52], P299[7.50], Y302[7.53], G303[7.54], L305[7.56], G306[8.47]                                                |
|                                                                 | -13.2          | K240[6.35], A244[6.39], L247[6.42], F248[6.43], F251[6.46], I290[7.41], F301[7.52], F304[7.55]                                                        |
|                                                                 | -12.2          | N200[5.43], F204[5.47], L205[5.48], F208[5.51], L209[5.52], L212[5.55], T213[5.56], T216[5.59], I254[6.49], Q257[6.52]                                |
| Angiotensin receptor Type II AT1, inactive, Human 4zud          |                |                                                                                                                                                       |
| 4zud_EC                                                         | -14.7          | F117[3.41], L155[4.52], A159[4.56], P162[4.59], H166[4.63], F182, L195[5.38], T198[5.41], K199[5.42], L202[5.45]                                      |
|                                                                 | -11.9          | H24, Y26[1.30], P255[6.50], F259[6.54], D278[7.29], I279[7.30], T282[7.33], A283[7.34], I286[7.37]                                                    |
|                                                                 | -11.7          | Y99[3.23], K102[3.26], I103[3.27], I150[4.47], W153[4.50], L154[4.51], G157[4.54], I164[4.61]                                                         |
| 4zud_IC                                                         | -15.3          | V62[2.38], F66[2.42], C121[3.45], I124[3.48], D125[3.49], T141[4.38], V144[4.41], A145[4.42], T148[4.45], L155[4.52]                                  |
|                                                                 | -13.6          | F208[5.51], I211[5.54], L212[5.55], Y215[5.58], T216[5.59], W219[5.62], M243[6.38], L247[6.42], F250[6.45], F251[6.46], I254[6.49]                    |
|                                                                 | -13.4          | K240[6.35], M243[6.38], A244[6.39], L247[6.42], F248[6.43], F251[6.46], I290[7.41], F301[7.52]                                                        |
|                                                                 | -13.2          | F248[6.43], I290[7.41], F293[7.44], L297[7.48], L300[7.51], F301[7.52], G303[7.54], F304[7.55]                                                        |
| Angiotensin II receptor Type 2 (AT2)                            |                |                                                                                                                                                       |
| Angiotensin receptor Type II AT2, active-like state, Human 5unf |                |                                                                                                                                                       |
| 5unf_EC                                                         | -13.1          | Y52[1.40], F55[1.43], F59[1.47], L91[2.51], L92[2.52], A95[2.55], P98[2.58], L99[2.59], T102[2.62], Y106[2.66], F112                                  |
|                                                                 | -13.0          | Q206[5.33], W207[5.34], G210[5.37], I211[5.38], M214[5.41], I217[5.44], L218[5.45], I222[5.49]                                                        |
|                                                                 | -12.6          | M170[4.52], L173[4.55], L176[4.58], P177[4.59], Y180[4.62], F181[4.63], W207[5.34], M214[5.41], L218[5.45], I222[5.49]                                |
| 5unf_IC                                                         | -13.5          | I81[2.41], F84[2.44], N85[2.45], V88[2.48], L92[2.52], F123[3.31], A160[4.42], S161[4.43], V164[4.46], P165[4.47]                                     |
|                                                                 | -13.1          | A260[6.39], I267[6.46], L305[7.40], L306[7.41], T309[7.44], V313[7.48], F316[7.51], L317[7.52], V321[7.56]                                            |
|                                                                 | -12.5          | Y82[2.42], C137[3.45], V140[3.48], I163[4.45], L166[4.48], M170[4.52], L218[5.45], I222[5.49], F226[5.53]                                             |
|                                                                 | -12.5          | L224[5.51], Y231[5.58], F232[5.59], A259[6.38], V262[6.41], L263[6.42], I266[6.45], L270[6.49], V274[6.53]                                            |
|                                                                 | -12.2          | I53[1.41], V56[1.44], I57[1.45], L60[1.48], V61[1.49], V64[1.52], F316[7.51], F320[7.55]                                                              |
| Angiotensin receptor Type II AT2, active-like state, Human 5ung |                |                                                                                                                                                       |
| 5ung_EC                                                         | -13.6          | Y52[1.40], F55[1.43], F59[1.47], I63[1.51], L91[2.51], L92[2.52], A95[2.55], P98[2.58], L99[2.59], T102[2.62], F112                                   |
|                                                                 | -13.0          | Q206[5.33], A209[5.36], G210[5.37], L213[5.40], M214[5.41], I217[5.44], L218[5.45], I222[5.49], M284[6.63]                                            |
|                                                                 | -12.9          | M170[4.52], L173[4.55], S174[4.56], L176[4.58], P177[4.59], Y180[4.62], M214[5.41], L218[5.45]                                                        |
|                                                                 | -12.2          | I266[6.45], I267[6.46], L270[6.49], P271[6.50], V274[6.53], L275[6.54], L278[6.57], V292[7.27], V295[7.30], I296[7.31]                                |
| 5ung_IC                                                         | -13.3          | L92[2.52], F123[3.31], L126[3.34], N127[3.35], S161[4.43], V164[4.46], P165[4.47], W168[4.50]                                                         |
|                                                                 | -13.0          | I54[1.42], A260[6.39], L263[6.42], A264[6.43], I267[6.46], C268[6.47], L305[7.40], L306[7.41], T309[7.44], V313[7.48], L317[7.52]                     |
|                                                                 | -12.9          | L224[5.51], Y231[5.58], F232[5.59], A259[6.38], V262[6.41], L263[6.42], I266[6.45], L270[6.49], V274[6.53]                                            |

| PDB <sup>a</sup>                                                   | E <sup>b</sup> | Local Residues <sup>c</sup>                                                                                                       |
|--------------------------------------------------------------------|----------------|-----------------------------------------------------------------------------------------------------------------------------------|
|                                                                    | -12.5          | T136[3.44], C137[3.45], V140[3.48], I163[4.45], M170[4.52], L218[5.45], I222[5.49], F226[5.53]                                    |
| Angiotensin receptor Type II AT2, active-like state, Human Sunh    |                |                                                                                                                                   |
| Sunh_IC                                                            | -13.8          | I81[2.41], N85[2.45], F123[3.31], L126[3.34], S161[4.43], V164[4.46], P165[4.47], W168[4.50]                                      |
|                                                                    | -13.5          | Y82[2.42], T136[3.44], C137[3.45], V140[3.48], I163[4.45], M170[4.52], L218[5.45], I222[5.49], F226[5.53]                         |
|                                                                    | -13.1          | F220[5.47], I221[5.48], L224[5.51], I225[5.52], A228[5.55], T229[5.56], F232[5.59], L270[6.49], V274[6.53]                        |
|                                                                    | -12.7          | I54[1.42], K256[6.35], A260[6.39], L263[6.42], A264[6.43], I267[6.46], C268[6.47], L305[7.40], L306[7.41], T309[7.44], V313[7.48] |
|                                                                    | -11.8          | Y231[5.58], F232[5.59], R235[5.62], V262[6.41], L263[6.42], I266[6.45], L270[6.49], V274[6.53]                                    |
| Cannabinoid CB1 receptor                                           |                |                                                                                                                                   |
| Cannabinoid CB1, inactive, Human 5tgz                              |                |                                                                                                                                   |
| 5tgz_EC                                                            | -13.3          | I353[6.45], I354[6.46], P358[6.50], A361[6.53], Y365[6.57], N372[7.28], L374[7.30], I375[7.31], V378[7.34]                        |
|                                                                    | -13.0          | A120[1.36], V121[1.37], L124[1.40], T125[1.41], F174[2.61], H178[2.65], V179[2.66], H181                                          |
|                                                                    | -12.1          | L287[5.51], V291[5.55], I353[6.45], G357[6.49], L360[6.52], A361[6.53], V364[6.56], Y365[6.57]                                    |
| 5tgz_IC                                                            | -15.4          | L142[1.58], R148, H154[2.41], V161[2.48], L165[2.52], R230[4.39], V234[4.43], C238[4.47]                                          |
|                                                                    | -13.4          | F208[3.44], L209[3.45], I212[3.48], I227, K232[4.41], A236[4.45], L239[4.48], I243[4.52], L286[5.50]                              |
| Cannabinoid CB1, inactive, Human 5u09                              |                |                                                                                                                                   |
| 5u09_EC                                                            | -12.9          | T274[5.38], M277[5.41], F278[5.42], G281[5.45], V282[5.46], V285[5.49], F289[5.53], F368[6.60]                                    |
|                                                                    | -12.7          | I354[6.46], P358[6.50], A361[6.53], I362[6.54], Y365[6.57], K370, N372[7.28], I375[7.31], V378[7.34]                              |
|                                                                    | -12.7          | L138[1.54], V161[2.48], L164[2.51], L165[2.52], V168[2.55], I169[2.56], Y172[2.59], R182, V188[3.24], F191[3.27], K192[3.28]      |
|                                                                    | -12.6          | L124[1.40], T125[1.41], T128[1.44], F129[1.45], L132[1.48], I175[2.62], V179[2.66], F180                                          |
|                                                                    | -12.6          | L287[5.51], L288[5.52], V291[5.55], I353[6.45], A361[6.53], V364[6.56], Y365[6.57], F368[6.60], G369[6.61]                        |
| 5u09_IC                                                            | -15.7          | I141[1.57], L142[1.58], L147, R148, Y153[2.40], H154[2.41], I156[2.43], G157[2.44], S158[2.45], V161[2.48]                        |
|                                                                    | -12.7          | F208[3.44], L209[3.45], K232[4.41], A236[4.45], L239[4.48], I243[4.52], I247[4.56], V282[5.46]                                    |
| Cannabinoid CB1, active intermediate, with cholesterol, Human 5xr8 |                |                                                                                                                                   |
| 5xr8_EC                                                            | -13.7          | L135[1.51], L164[2.51], L165[2.52], V168[2.55], I169[2.56], Y172[2.59], R182, K192[3.28]                                          |
|                                                                    | -12.9          | L124[1.40], T128[1.44], L132[1.48], V171[2.58], Y172[2.59], I175[2.62], D176[2.63], F180                                          |
|                                                                    | -12.9          | L117[1.33], A120[1.36], V121[1.37], L124[1.40], T125[1.41], T128[1.44], F129[1.45], L132[1.48], V179[2.66]                        |
| 5xr8_IC                                                            | -15.2          | I141[1.57], Y153[2.40], H154[2.41], G157[2.44], S158[2.45], V161[2.48], L165[2.52], W241[4.50], I245[4.54]                        |
|                                                                    | -13.1          | K343[6.35], L347[6.39], V351[6.43], I354[6.46], V392[7.48], I395[7.51], I396[7.52], L399[7.55], R400[7.56]                        |
|                                                                    | -12.4          | F208[3.44], L209[3.45], I212[3.48], K232[4.41], A236[4.45], I243[4.52], F278[5.42], V282[5.46]                                    |
|                                                                    | -12.8          | F208[3.44], I212[3.48], I216[3.52], I227, G281[5.45], V282[5.46], V285[5.49], F289[5.53]                                          |
| Cannabinoid CB1, active intermediate, with cholesterol, Human 5xra |                |                                                                                                                                   |
| 5xra_EC                                                            | -13.7          | L124[1.40], T128[1.44], L132[1.48], V171[2.58], Y172[2.59], I175[2.62], D176[2.63], F180                                          |
| 5xra_IC                                                            | -15.8          | H154[2.41], G157[2.44], S158[2.45], V161[2.48], L165[2.52], F237[4.46], C238[4.47], W241[4.50], I245[4.54]                        |
|                                                                    | -12.9          | F208[3.44], L209[3.45], K232[4.41], A233[4.42], V235[4.44], A236[4.45], L239[4.48], I243[4.52], F278[5.42], V282[5.46]            |
|                                                                    | -12.4          | F208[3.44], I212[3.48], I216[3.52], I227, G281[5.45], V282[5.46], V285[5.49], L286[5.50]                                          |
|                                                                    | -14.2          | I212[3.48], Y215[3.51], I216[3.52], R220[3.56], V285[5.49], L288[5.52], F289[5.53], Y292[5.56]                                    |
| Chemokine CC receptor                                              |                |                                                                                                                                   |
| Chemokine CC receptor, Type 2, inactive, Human 5t1a                |                |                                                                                                                                   |

| PDB <sup>a</sup> | E <sup>b</sup> | Local Residues <sup>c</sup>                                                                                                        |
|------------------|----------------|------------------------------------------------------------------------------------------------------------------------------------|
| 5t1a_EC          | -13.1          | L90[2.52], K114[3.26], L115[3.27], G118[3.30], L119[3.31], I122[3.34], W165[4.50], V169[4.54], I176[4.61]                          |
|                  | -13.1          | V167[4.52], F170[4.55], V173[4.58], P174[4.59], I177[4.62], F178[4.63], W198[5.35], F201[5.38]                                     |
|                  | -12.9          | F253[6.45], L254[6.46], T257[6.49], P258[6.50], I261[6.53], V262[6.54], L265[6.57], L283[7.30], A286[7.33]                         |
|                  | -12.8          | S50[1.40], F53[1.43], I54[1.44], F57[1.47], V58[1.48], P96[2.58], A99[2.61], H100[2.62], A103[2.65]                                |
|                  | -12.2          | I40[1.30], L44[1.34], L48[1.38], V289[7.36], T292[7.39], L293[7.40], T296[7.43], C299[7.46], I300[7.47]                            |
|                  | -13.7          | F53[1.43], F57[1.47], M61[1.51], I93[2.55], P96[2.58], L97[2.59], H100[2.62], F108                                                 |
| 5t1a_IC          | -13.5          | L73, I79[2.41], L82[2.44], N83[2.45], I86[2.48], L90[2.52], L119[3.31], I122[3.34], V158[4.43], V162[4.47], W165[4.50], V169[4.54] |
|                  | -12.9          | T247[6.39], V251[6.43], L254[6.46], F255[6.47], T296[7.43], I300[7.47], I304[7.51], F307[7.54], V308[7.55]                         |
|                  | -12.4          | I132[3.44], L133[3.45], I136[3.48], F156[4.41], V167[4.52], M205[5.42], L209[5.46], L213[5.50]                                     |

## Chemokine CC receptor, Type 5, inactive, Human 4mbs

|         |                                                                                          |                                                                                                            |
|---------|------------------------------------------------------------------------------------------|------------------------------------------------------------------------------------------------------------|
| 4mbs_EC | -14.1                                                                                    | Q102[3.26], L103[3.27], G106[3.30], I110[3.34], V150[4.47], W153[4.50], V154[4.51], V157[4.54], I164[4.61] |
|         | -12.4                                                                                    | V155[4.52], F158[4.55], A159[4.56], L161[4.58], P162[4.59], W190[5.35], F193[5.38], K197[5.42], L201[5.46] |
|         | -12.2                                                                                    | F245[6.45], L246[6.46], A249[6.49], P250[6.50], I253[6.53], V254[6.54], L257[6.57], R274[7.29]             |
|         | -12.2                                                                                    | L32[1.34], L36[1.38], F247[6.47], V281[7.36], T284[7.39], L285[7.40], T288[7.43], I292[7.47], I295[7.50]   |
| 4mbs_IC | -12.8                                                                                    | I124[3.48], Y127[3.51], I200[5.45], V204[5.49], L205[5.50], L208[5.53], V209[5.54], I212[5.57], C213[5.58] |
|         | -12.4                                                                                    | L61, I67[2.41], N71[2.45], F78[2.52], V146[4.43], V150[4.47], W153[4.50], V157[4.54]                       |
|         | -12.4                                                                                    | R235[6.35], T239[6.39], V243[6.43], F247[6.47], I292[7.47], I295[7.50], I296[7.51], F299[7.54], V300[7.55] |
|         | -13.5                                                                                    | M64[2.38], I120[3.44], L121[3.45], I124[3.48], L128[3.52], F144[4.41], T148[4.45], L201[5.46], L205[5.50]  |
| -12.6   | F45[1.47], V46[1.48], M49[1.51], L50[1.52], L53[1.55], I54[1.56], Y307[8.53], F311[8.57] |                                                                                                            |

## Chemokine CC receptor, Type 9, inactive, with cholesterol, Human 5lwe

|         |       |                                                                                                                                    |
|---------|-------|------------------------------------------------------------------------------------------------------------------------------------|
| 5lwe_EC | -13.6 | R44[1.28], F46[1.30], A47[1.31], F50[1.34], L51[1.35], I297[7.32], Q300[7.35], V301[7.36], A304[7.39], I305[7.40]                  |
|         | -12.6 | L175[4.52], A178[4.55], L179[4.56], I181[4.58], P182[4.59], L185[4.62], Y186[4.63], V214[5.39], L217[5.42], K218[5.43], L221[5.46] |
|         | -12.4 | F117[3.23], K120[3.26], V121[3.27], S124[3.30], M125[3.31], W173[4.50], V174[4.51], I184[4.61]                                     |
| 5lwe_IC | -13.6 | W74[1.58], M85[2.41], L88[2.44], N89[2.45], I92[2.48], L96[2.52], K166[4.43], F170[4.47], W173[4.50]                               |
|         | -12.9 | K254[6.35], T258[6.39], T261[6.42], V262[6.43], L265[6.46], I305[7.40], F308[7.43], L312[7.47], L316[7.51]                         |
|         | -12.4 | F50[1.34], L54[1.38], L57[1.41], F308[7.43], L312[7.47], V315[7.50], L316[7.51], F319[7.54]                                        |

## Chemokine CXC receptor

## Chemokine CXC Receptor Type 4, inactive, Human 3odu

|         |       |                                                                                                                                    |
|---------|-------|------------------------------------------------------------------------------------------------------------------------------------|
| 3odu_EC | -12.6 | L167[4.56], L194[5.34], V197[5.37], V198[5.38], F201[5.41], Q202[5.42], M205[5.45], V206[5.46]                                     |
|         | -12.6 | P163[4.52], L166[4.55], L167[4.56], I169[4.58], P170[4.59], I173[4.62], F174[4.63], W195[5.35]                                     |
|         | -12.1 | L208[5.48], F249[6.45], L253[6.49], Y256[6.52], I257[6.53], S260[6.56], I261[6.57], F264[6.60], I270                               |
|         | -12.1 | K38[1.32], I39[1.33], P42[1.36], T43[1.37], S46[1.40], I47[1.41], L50[1.44], V99[2.65]                                             |
|         | -12.9 | V197[5.37], Q200[5.40], F201[5.41], I204[5.44], I209[5.49], S263[6.59], L266[6.62], L267[6.63]                                     |
| 3odu_IC | -14.2 | H79[2.45], V82[2.48], L86[2.52], A111[3.27], V114[3.30], I115[3.31], Y157[4.46], W161[4.50], L165[4.54]                            |
|         | -13.3 | I60[1.54], Y65[1.59], V82[2.48], L85[2.51], L86[2.52], I89[2.55], T90[2.56], F93[2.59], I115[3.31]                                 |
|         | -13.0 | I47[1.41], T51[1.45], G55[1.49], L58[1.52], F293[7.43], C296[7.46], P299[7.49], I300[7.50], A303[7.53], F304[7.54]                 |
|         | -12.7 | W125[3.41], F129[3.45], L132[3.48], L151[4.40], V155[4.44], G159[4.48], P163[4.52], L167[4.56], Q202[5.42], V206[5.46], L210[5.50] |
|         | -12.6 | A247[6.43], A250[6.46], C251[6.47], P254[6.50], L290[7.40], L297[7.47], I300[7.50], L301[7.51], F304[7.54]                         |
|         | -12.3 | I215[5.55], L216[5.56], Y219[5.59], V242[6.38], I245[6.41], L246[6.42], F249[6.45], L253[6.49], Y256[6.52]                         |

## Chemokine CXC Receptor Type 4, inactive, Human 3oe0

|         |       |                                                                                        |
|---------|-------|----------------------------------------------------------------------------------------|
| 3oe0_EC | -13.0 | K38[1.32], I39[1.33], P42[1.36], T43[1.37], S46[1.40], I47[1.41], L50[1.44], V99[2.65] |
|---------|-------|----------------------------------------------------------------------------------------|

| PDB <sup>a</sup>                                    | E <sup>b</sup> | Local Residues <sup>c</sup>                                                                                                        |
|-----------------------------------------------------|----------------|------------------------------------------------------------------------------------------------------------------------------------|
|                                                     | -12.4          | L208[5.48], L253[6.49], I257[6.53], S260[6.56], I261[6.57], F264[6.60], I270, F276[7.26]                                           |
|                                                     | -12.8          | P42[1.36], S46[1.40], F49[1.43], L50[1.44], I53[1.47], P92[2.58], A95[2.61], V96[2.62], V99[2.65]                                  |
|                                                     | -12.3          | P163[4.52], L166[4.55], L167[4.56], I169[4.58], P170[4.59], I173[4.62], W195[5.35], F199[5.39], Q202[5.42]                         |
| 3oe0_IC                                             | -13.1          | G64[1.58], L78[2.44], H79[2.45], V82[2.48], L86[2.52], V114[3.30], V118[3.34], Y157[4.46], W161[4.50], L165[4.54]                  |
|                                                     | -13.0          | W125[3.41], F129[3.45], L132[3.48], L151[4.40], V155[4.44], G159[4.48], P163[4.52], L167[4.56], Q202[5.42], V206[5.46], L210[5.50] |
| Chemokine CXC Receptor Type 4, inactive, Human 3oe6 |                |                                                                                                                                    |
| 3oe6_EC                                             | -15.6          | P254[6.50], I257[6.53], G258[6.54], I261[6.57], F276[7.26], T279[7.29], V280[7.30], W283[7.33], T287[7.37]                         |
|                                                     | -13.0          | P163[4.52], L166[4.55], L167[4.56], I169[4.58], P170[4.59], I173[4.62], F174[4.63], W195[5.35], F199[5.39], Q202[5.42], V206[5.46] |
|                                                     | -12.5          | F49[1.43], I53[1.47], I89[2.55], P92[2.58], F93[2.59], V96[2.62], Y103, F104                                                       |
|                                                     | -12.0          | K38[1.32], I39[1.33], P42[1.36], T43[1.37], S46[1.40], I47[1.41], L50[1.44], V99[2.65]                                             |
| 3oe6_IC                                             | -13.7          | L216[5.56], Y219[5.59], I223[5.63], V242[6.38], I245[6.41], L246[6.42], F249[6.45], L253[6.49], Y256[6.52]                         |
|                                                     | -12.9          | W125[3.41], F129[3.45], L132[3.48], L151[4.40], V155[4.44], V158[4.47], G159[4.48], P163[4.52], L167[4.56], V206[5.46]             |
|                                                     | -12.8          | R70, L78[2.44], H79[2.45], V82[2.48], L86[2.52], V114[3.30], I115[3.31], V118[3.34], Y157[4.46], W161[4.50], L165[4.54]            |
|                                                     | -12.4          | I243[6.39], A247[6.43], P254[6.50], L290[7.40], F293[7.43], L297[7.47], I300[7.50], L301[7.51]                                     |
|                                                     | -12.7          | L132[3.48], Y135[3.51], M205[5.45], L210[5.50], I213[5.53], V214[5.54], S217[5.57], I221[5.61]                                     |
|                                                     | -12.3          | I44[1.38], I47[1.41], I48[1.42], T51[1.45], L290[7.40], F293[7.43], I300[7.50], F304[7.54]                                         |
| Chemokine CXC Receptor Type 4, inactive, Human 3oe8 |                |                                                                                                                                    |
| 3oe8_EC                                             | -13.2          | L208[5.48], I209[5.49], G212[5.52], I213[5.53], F249[6.45], Y256[6.52], I257[6.53], S260[6.56], I261[6.57]                         |
| 3oe8_IC                                             | -13.7          | H79[2.45], V82[2.48], L86[2.52], A111[3.27], V114[3.30], I115[3.31], Y157[4.46], W161[4.50], L165[4.54]                            |
|                                                     | -13.4          | T51[1.45], V54[1.48], G55[1.49], L58[1.52], V59[1.53], V62[1.56], K67, P299[7.49], I300[7.50], Y302[7.52], A303[7.53]              |
|                                                     | -12.4          | F129[3.45], V155[4.44], V158[4.47], G159[4.48], P163[4.52], L166[4.55], L167[4.56], I169[4.58], P170[4.59], Q202[5.42]             |
|                                                     | -12.1          | W125[3.41], V155[4.44], G159[4.48], P163[4.52], F201[5.41], Q202[5.42], V206[5.46], L210[5.50]                                     |
| Chemokine CXC Receptor Type 4, inactive, Human 3oe9 |                |                                                                                                                                    |
| 3oe9_EC                                             | -12.4          | V196[5.36], V197[5.37], Q200[5.40], F201[5.41], I204[5.44], I209[5.49], I259[6.55], S263[6.59], L266[6.62]                         |
|                                                     | -12.2          | L253[6.49], P254[6.50], I257[6.53], G258[6.54], I261[6.57], V280[7.30], W283[7.33], T287[7.37]                                     |
|                                                     | -11.7          | L208[5.48], F249[6.45], L253[6.49], I257[6.53], S260[6.56], I261[6.57], F264[6.60], I270                                           |
|                                                     | -11.6          | F40[1.34], A247[6.43], A250[6.46], P254[6.50], K282[7.32], W283[7.33], I286[7.36], L290[7.40]                                      |
|                                                     | -11.6          | F49[1.43], I53[1.47], L85[2.51], I89[2.55], P92[2.58], F93[2.59], V96[2.62], F104                                                  |
| 3oe9_IC                                             | -12.9          | V82[2.48], L86[2.52], F107[3.23], A111[3.27], V114[3.30], Y157[4.46], W161[4.50], L165[4.54], F172[4.61]                           |
|                                                     | -12.9          | V155[4.44], V158[4.47], G159[4.48], P163[4.52], L167[4.56], P170[4.59], F199[5.39], Q202[5.42], V206[5.46]                         |
|                                                     | -12.8          | I243[6.39], A247[6.43], A250[6.46], C251[6.47], L297[7.47], I300[7.50], L301[7.51], A303[7.53]                                     |
|                                                     | -12.3          | I47[1.41], L50[1.44], T51[1.45], V54[1.48], G55[1.49], L58[1.52], P299[7.49], Y302[7.52]                                           |
| Chemokine CXC Receptor Type 4, inactive, Human 4rws |                |                                                                                                                                    |
| 4rws_EC                                             | -13.2          | P163[4.52], L166[4.55], L167[4.56], I169[4.58], P170[4.59], I173[4.62], W195[5.35], F199[5.39], Q202[5.42], V206[5.46], L210[5.50] |
| 4rws_IC                                             | -13.2          | I204[5.44], L208[5.48], I209[5.49], G212[5.52], I215[5.55], L216[5.56], Y219[5.59], V242[6.38], I245[6.41], L246[6.42], F249[6.45] |
|                                                     | -13.0          | I47[1.41], L50[1.44], T51[1.45], V54[1.48], G55[1.49], L58[1.52], P299[7.49], I300[7.50], Y302[7.52], A303[7.53]                   |
|                                                     | -12.9          | A247[6.43], A250[6.46], C251[6.47], P254[6.50], L290[7.40], F293[7.43], L297[7.47], I300[7.50], L301[7.51], A303[7.53]             |
|                                                     | -12.5          | W125[3.41], F129[3.45], L132[3.48], L151[4.40], V155[4.44], G159[4.48], P163[4.52], L166[4.55], L167[4.56], V206[5.46]             |
|                                                     | -13.9          | I44[1.38], I47[1.41], I48[1.42], T51[1.45], L290[7.40], F293[7.43], I300[7.50], A303[7.53]                                         |
|                                                     | -13.9          | G64[1.58], Y65[1.59], L78[2.44], V82[2.48], L86[2.52], V118[3.34], Y157[4.46], L165[4.54]                                          |

| PDB <sup>a</sup>                                                   | E <sup>b</sup> | Local Residues <sup>c</sup>                                                                                            |
|--------------------------------------------------------------------|----------------|------------------------------------------------------------------------------------------------------------------------|
| Complement C5a receptor                                            |                |                                                                                                                        |
| Complement C5a receptor, inactive, Human 5o9h                      |                |                                                                                                                        |
| 5o9h_EC                                                            | -13.1          | I253[6.46], L256[6.49], P257[6.50], V260[6.53], M264[6.57], T274[7.27], L278[7.31], F288[7.41]                         |
|                                                                    | -13.0          | F48[1.43], V52[1.47], F83[2.51], L87[2.55], P90[2.58], A91[2.59], F104, A108[3.24], L112[3.28]                         |
|                                                                    | -12.7          | V80[2.48], L84[2.52], S110[3.26], I111[3.27], L115[3.31], L118[3.34], L165[4.54], A172[4.61], L173[4.62]               |
|                                                                    | -12.4          | L207[5.43], F211[5.47], L212[5.48], L215[5.51], L256[6.49], V260[6.53], I263[6.56], M264[6.57], F267[6.60]             |
|                                                                    | -12.9          | V80[2.48], F83[2.51], L84[2.52], L87[2.55], A107[3.23], A108[3.24], I111[3.27], L112[3.28]                             |
|                                                                    | -11.7          | L33, I38[1.33], L41[1.36], V42[1.37], A45[1.40], V46[1.41], L49[1.44], F93[2.61], V97[2.65]                            |
|                                                                    | -11.8          | F48[1.43], L49[1.44], L53[1.48], P90[2.58], F93[2.61], T94[2.62], V97[2.65], Q98[2.66]                                 |
| 5o9h_IC                                                            | -13.1          | I253[6.46], L256[6.49], P257[6.50], V260[6.53], M264[6.57], T274[7.27], L278[7.31], F288[7.41]                         |
|                                                                    | -13.0          | F48[1.43], V52[1.47], F83[2.51], L87[2.55], P90[2.58], A91[2.59], F104, A108[3.24], L112[3.28]                         |
|                                                                    | -12.7          | V80[2.48], L84[2.52], S110[3.26], I111[3.27], L115[3.31], L118[3.34], L165[4.54], A172[4.61], L173[4.62]               |
|                                                                    | -12.4          | L207[5.43], F211[5.47], L212[5.48], L215[5.51], L256[6.49], V260[6.53], I263[6.56], M264[6.57], F267[6.60]             |
|                                                                    | -12.9          | V80[2.48], F83[2.51], L84[2.52], L87[2.55], A107[3.23], A108[3.24], I111[3.27], L112[3.28]                             |
|                                                                    | -11.7          | L33, I38[1.33], L41[1.36], V42[1.37], A45[1.40], V46[1.41], L49[1.44], F93[2.61], V97[2.65]                            |
|                                                                    | -11.8          | F48[1.43], L49[1.44], L53[1.48], P90[2.58], F93[2.61], T94[2.62], V97[2.65], Q98[2.66]                                 |
| Complement C5a receptor, inactive, residues renumbered, Human 6c1q |                |                                                                                                                        |
| 6c1q_EC                                                            | -13.9          | L163[4.52], L167[4.56], P170[4.59], Y174[4.63], R198[5.34], V202[5.38], V205[5.41], L209[5.45]                         |
|                                                                    | -13.6          | F48[1.43], V52[1.47], F83[2.51], L87[2.55], I91[2.59], F190, A108[3.24], L112[3.28]                                    |
|                                                                    | -12.0          | I253[6.46], L256[6.49], P257[6.50], V260[6.53], T261[6.54], M264[6.57], T274[7.27], L277[7.30], L278[7.31], L281[7.34] |
|                                                                    | -12.0          | F48[1.43], L49[1.44], L53[1.48], P90[2.58], I91[2.59], T94[2.62], Q98[2.66], P189, F190                                |
|                                                                    | -11.9          | F83[2.51], L84[2.52], L87[2.55], F190, A107[3.23], A108[3.24], I111[3.27], L112[3.28]                                  |
|                                                                    | -11.8          | L207[5.43], F211[5.47], L212[5.48], L215[5.51], L256[6.49], V260[6.53], I263[6.56], M264[6.57], F267[6.60]             |
|                                                                    | -11.6          | V35[1.30], P36[1.31], L39[1.34], I253[6.46], L256[6.49], P257[6.50], L277[7.30], L281[7.34], L284[7.37], F288[7.41]    |
| 6c1q_IC                                                            | -13.9          | L163[4.52], L167[4.56], P170[4.59], Y174[4.63], R198[5.34], V202[5.38], V205[5.41], L209[5.45]                         |
|                                                                    | -13.6          | F48[1.43], V52[1.47], F83[2.51], L87[2.55], I91[2.59], F190, A108[3.24], L112[3.28]                                    |
|                                                                    | -12.0          | I253[6.46], L256[6.49], P257[6.50], V260[6.53], T261[6.54], M264[6.57], T274[7.27], L277[7.30], L278[7.31], L281[7.34] |
|                                                                    | -12.0          | F48[1.43], L49[1.44], L53[1.48], P90[2.58], I91[2.59], T94[2.62], Q98[2.66], P189, F190                                |
|                                                                    | -11.9          | F83[2.51], L84[2.52], L87[2.55], F190, A107[3.23], A108[3.24], I111[3.27], L112[3.28]                                  |
|                                                                    | -11.8          | L207[5.43], F211[5.47], L212[5.48], L215[5.51], L256[6.49], V260[6.53], I263[6.56], M264[6.57], F267[6.60]             |
|                                                                    | -11.6          | V35[1.30], P36[1.31], L39[1.34], I253[6.46], L256[6.49], P257[6.50], L277[7.30], L281[7.34], L284[7.37], F288[7.41]    |
| Complement C5a receptor, inactive, residues renumbered, Human 6c1r |                |                                                                                                                        |
| 6c1r_EC                                                            | -13.1          | F48[1.43], V52[1.47], F83[2.51], L87[2.55], P90[2.58], I91[2.59], F190, G105[3.21], A108[3.24], L112[3.28]             |
|                                                                    | -12.7          | R197[5.33], R200[5.36], A201[5.37], I204[5.40], V205[5.41], V208[5.44], L209[5.45], W213[5.49]                         |
|                                                                    | -12.4          | L207[5.43], F211[5.47], L212[5.48], L215[5.51], L256[6.49], V260[6.53], I263[6.56], M264[6.57], F267[6.60]             |
|                                                                    | -12.4          | V80[2.48], F83[2.51], L84[2.52], L87[2.55], A107[3.23], A108[3.24], I111[3.27], L112[3.28], L115[3.31]                 |
|                                                                    | -12.3          | I253[6.46], L256[6.49], P257[6.50], V260[6.53], T261[6.54], M264[6.57], T274[7.27], L277[7.30], L278[7.31], L281[7.34] |
|                                                                    | -12.2          | V35[1.30], P36[1.31], L39[1.34], I253[6.46], F254[6.47], L277[7.30], L281[7.34], L284[7.37], F288[7.41]                |
|                                                                    | -12.1          | F48[1.43], L49[1.44], P90[2.58], I91[2.59], T94[2.62], Q98[2.66], P189, F190                                           |
| 6c1r_IC                                                            | -13.1          | F48[1.43], V52[1.47], F83[2.51], L87[2.55], P90[2.58], I91[2.59], F190, G105[3.21], A108[3.24], L112[3.28]             |
|                                                                    | -12.7          | R197[5.33], R200[5.36], A201[5.37], I204[5.40], V205[5.41], V208[5.44], L209[5.45], W213[5.49]                         |
|                                                                    | -12.4          | L207[5.43], F211[5.47], L212[5.48], L215[5.51], L256[6.49], V260[6.53], I263[6.56], M264[6.57], F267[6.60]             |
|                                                                    | -12.4          | V80[2.48], F83[2.51], L84[2.52], L87[2.55], A107[3.23], A108[3.24], I111[3.27], L112[3.28], L115[3.31]                 |
|                                                                    | -12.3          | I253[6.46], L256[6.49], P257[6.50], V260[6.53], T261[6.54], M264[6.57], T274[7.27], L277[7.30], L278[7.31], L281[7.34] |
|                                                                    | -12.2          | V35[1.30], P36[1.31], L39[1.34], I253[6.46], F254[6.47], L277[7.30], L281[7.34], L284[7.37], F288[7.41]                |

| PDB <sup>a</sup>                           | E <sup>b</sup> | Local Residues <sup>c</sup>                                                                                                                         |
|--------------------------------------------|----------------|-----------------------------------------------------------------------------------------------------------------------------------------------------|
|                                            | -12.1          | F48[1.43], L49[1.44], P90[2.58], I91[2.59], T94[2.62], Q98[2.66], P189, F190                                                                        |
| Dopamine receptor                          |                |                                                                                                                                                     |
| Dopamine receptor D2, inactive, Human 6c38 |                |                                                                                                                                                     |
| 6c38_EC                                    | -13.7          | L162[4.52], I166[4.56], P169[4.59], L174, N175, N176, Y192[5.41], V196[5.45]                                                                        |
|                                            | -12.6          | V190[5.39], V191[5.40], I195[5.44], Y199[5.48], I203[5.52], L206[5.55], I415[7.42], I418[7.45]                                                      |
|                                            | -12.5          | T42[1.40], I45[1.43], V49[1.47], T85[2.55], P89[2.59], V92[2.62], Y93[2.63], V96[2.66], V97[2.67]                                                   |
|                                            | -13.0          | F202[5.51], L206[5.55], I404[7.31], L408[7.35], I412[7.39], I415[7.42], L416[7.43], H419[7.46]                                                      |
| 6c38_IC                                    | -14.6          | Y209[5.58], I210[5.59], I212[5.61], Y213[5.62], A397[6.59], G401, I404[7.31], I405[7.32], L408[7.35], P409[7.36], I412[7.39]                        |
|                                            | -14.4          | L82[2.52], L86[2.56], L113[3.31], M116[3.34], M117[3.35], T153[4.43], I156[4.46], S157[4.47], W160[4.50]                                            |
|                                            | -12.5          | C126[3.44], I130[3.48], R151[4.41], M155[4.45], I158[4.48], L162[4.52], V196[5.45], V200[5.49]                                                      |
|                                            | -12.4          | L40[1.38], V47[1.45], F50[1.48], L54[1.52], I445, T448, F458, L462                                                                                  |
|                                            | -12.4          | T42[1.40], I45[1.43], A46[1.44], V49[1.47], F50[1.48], L54[1.52], M57[1.55], I461, L462                                                             |
| Dopamine receptor D3, inactive, Human 3pbl |                |                                                                                                                                                     |
| 3pbl_EC                                    | -14.7          | I339[6.45], V340[6.46], L343[6.49], P344[6.50], L347[6.53], T348[6.54], H359, L364[7.34]                                                            |
|                                            | -13.4          | I190[5.40], V194[5.44], Y198[5.48], F201[5.51], G202[5.52], V205[5.55], V350[6.56], H354[6.60]                                                      |
|                                            | -12.6          | I40[1.43], L41[1.44], V44[1.47], T80[2.55], P84[2.59], V87[2.62], Y88[2.63], V91[2.66]                                                              |
| 3pbl_IC                                    | -15.0          | Y208[5.58], I211[5.61], Y212[5.62], A332[6.38], L335[6.41], G336[6.42], I339[6.45], V340[6.46], L343[6.49], P344[6.50]                              |
|                                            | -13.5          | S35[1.38], A38[1.41], L39[1.42], A42[1.45], F45[1.48], G46[1.49], L49[1.52], W370[7.40], A377[7.47], V381[7.51], T384[7.54], F394[8.54], L398[8.58] |
|                                            | -13.2          | Y66[2.41], V69[2.44], S70[2.45], A151[4.43], I154[4.46], T155[4.47], W158[4.50], V159[4.51], F162[4.54]                                             |
|                                            | -12.5          | W119[3.41], R149[4.41], L152[4.44], M153[4.45], A156[4.48], L160[4.52], V195[5.45], L199[5.49]                                                      |
|                                            | -12.4          | I40[1.43], L41[1.44], V44[1.47], F45[1.48], L49[1.52], M52[1.55], I397[8.57], L398[8.58]                                                            |
|                                            | -12.4          | V44[1.47], G48[1.51], C51[1.54], M52[1.55], L55[1.58], L76[2.51], T80[2.55], L81[2.56]                                                              |
| Dopamine receptor D4, inactive, Human 5wiu |                |                                                                                                                                                     |
| 5wiu_EC                                    | -14.0          | G40[1.38], L43[1.41], R428[7.33], L429[7.34], S431[7.36], A432[7.37], W435[7.40], V439[7.44]                                                        |
|                                            | -13.1          | V42[1.40], I45[1.43], G46[1.44], L49[1.47], A50[1.48], P89[2.59], L90[2.60], V92[2.62], Y93[2.63]                                                   |
|                                            | -12.3          | F202[5.48], P206[5.52], L209[5.55], L210[5.56], V412[6.53], I415[6.56], T416[6.57], L419[6.60]                                                      |
|                                            | -12.5          | F124[3.41], C127[3.44], A128[3.45], T159[4.49], L162[4.52], V166[4.56], Y195[5.41], C199[5.45], L203[5.49]                                          |
|                                            | -12.4          | V194[5.40], V198[5.44], F202[5.48], L203[5.49], P206[5.52], L210[5.56], I415[6.56], L419[6.60]                                                      |
| 5wiu_IC                                    | -14.0          | S71[2.41], V74[2.44], S75[2.45], A78[2.48], L82[2.52], L86[2.56], M114[3.31], M117[3.34], L153[4.43], I156[4.46], W160[4.50]                        |
|                                            | -13.5          | R394[6.35], P397[6.38], V398[6.39], G401[6.42], L404[6.45], L405[6.46], T408[6.49], F451[7.56]                                                      |
|                                            | -13.2          | L209[5.55], Y212[5.58], F216[5.62], P397[6.38], V400[6.41], G401[6.42], L404[6.45], L405[6.46], T408[6.49]                                          |
|                                            | -12.9          | C56[1.54], V57[1.55], V59[1.57], A60[1.58], V74[2.44], A78[2.48], L82[2.52], L85[2.55], L86[2.56]                                                   |
| Dopamine receptor D4, inactive, Human 5wiv |                |                                                                                                                                                     |
| 5wiv_EC                                    | -13.8          | Q33[1.31], A36[1.34], A37[1.35], G40[1.38], R428[7.33], W435[7.40], V439[7.44], L443[7.48]                                                          |
|                                            | -13.4          | V42[1.40], I45[1.43], G46[1.44], L49[1.47], A50[1.48], P89[2.59], L90[2.60], V92[2.62], Y93[2.63]                                                   |
|                                            | -11.7          | F202[5.48], L209[5.55], L404[6.45], T408[6.49], V412[6.53], I415[6.56], T416[6.57], L419[6.60]                                                      |
| 5wiv_IC                                    | -13.9          | S71[2.41], V74[2.44], S75[2.45], A78[2.48], L82[2.52], L86[2.56], L153[4.43], I156[4.46]                                                            |
|                                            | -13.1          | L209[5.55], Y212[5.58], W213[5.59], F216[5.62], P397[6.38], G401[6.42], L404[6.45], L405[6.46], T408[6.49], P409[6.50]                              |
|                                            | -13.2          | C56[1.54], V59[1.57], A60[1.58], V74[2.44], L81[2.51], L82[2.52], L85[2.55], L86[2.56]                                                              |

| PDB <sup>a</sup>                                                          | E <sup>b</sup> | Local Residues <sup>c</sup>                                                                                                                                                                    |
|---------------------------------------------------------------------------|----------------|------------------------------------------------------------------------------------------------------------------------------------------------------------------------------------------------|
| Endothelin ETB receptor                                                   |                |                                                                                                                                                                                                |
| Endothelin ETB receptor, inactive, Human 5glh                             |                |                                                                                                                                                                                                |
| 5glh_EC                                                                   | -13.0          | V228[4.52], V231[4.55], L232[4.56], V234[4.58], P235[4.59], I238[4.62], T263[5.28], F265[5.30], M266[5.31]                                                                                     |
|                                                                           | -12.1          | E172[3.23], K175[3.26], F179[3.30], V227[4.51], V230[4.54], V231[4.55], V234[4.58], A237[4.61]                                                                                                 |
| 5glh_IC                                                                   | -15.3          | L286[5.51], A290[5.55], Y293[5.58], K323[6.35], T324[6.36], F326[6.38], C327[6.39], L330[6.42]                                                                                                 |
|                                                                           | -13.8          | L190[3.41], A194[3.45], I197[3.48], R201[3.52], E221[4.45], L224[4.48], V228[4.52], L232[4.56]                                                                                                 |
|                                                                           | -13.5          | L110[1.41], V113[1.44], L114[1.45], I117[1.48], F397[8.54], K398[8.55], A400[8.57], L401[8.58]                                                                                                 |
|                                                                           | -13.1          | F112[1.43], V113[1.44], I116[1.47], I117[1.48], S120[1.51], T121[1.52], Y124[1.55], K128[1.59]                                                                                                 |
|                                                                           | -12.8          | I138[2.41], L145[2.48], A219[4.43], I222[4.46], V223[4.47], W226[4.50], V227[4.51], V230[4.54]                                                                                                 |
| Endothelin ETB receptor, inactive, Human 5gli                             |                |                                                                                                                                                                                                |
| 5gli_EC                                                                   | -12.8          | N104[1.35], D147[2.50], H150[2.53], I155[2.58], N158[2.61], K161[2.64], L162[2.65], Q181[3.32], V185[3.36], T188[3.39], W336[6.48], I372[7.39], A375[7.42], S376[7.43], N378[7.45], S379[7.46] |
|                                                                           | -12.1          | I116[1.47], V152[2.55], I153[2.56], P156[2.59], I157[2.60], Y160[2.63], F169, M173[3.24]                                                                                                       |
| 5gli_IC                                                                   | -14.0          | I116[1.47], S120[1.51], T121[1.52], Y124[1.55], L148[2.51], V152[2.55], A400[8.57], L401[8.58], C403[8.60]                                                                                     |
|                                                                           | -13.4          | A194[3.45], I197[3.48], D198[3.49], R201[3.52], E221[4.45], L224[4.48], V228[4.52], L232[4.56]                                                                                                 |
|                                                                           | -13.1          | Y127[1.58], L145[2.48], F179[3.30], V214[4.38], A219[4.43], I222[4.46], V223[4.47], W226[4.50], V230[4.54]                                                                                     |
|                                                                           | -12.3          | F278[5.43], F282[5.47], L286[5.51], A290[5.55], Y293[5.58], T294[5.59], F326[6.38], A333[6.45], L337[6.49]                                                                                     |
| Endothelin ETB receptor, inactive, agonist bound, Human 5x93              |                |                                                                                                                                                                                                |
| 5x93_EC                                                                   | -12.9          | K175[3.26], F179[3.30], V223[4.47], V227[4.51], V230[4.54], V234[4.58], A237[4.61], I238[4.62]                                                                                                 |
|                                                                           | -12.5          | F112[1.43], I116[1.47], V152[2.55], P156[2.59], I157[2.60], Y160[2.63], F169, M173[3.24]                                                                                                       |
| 5x93_IC                                                                   | -14.4          | I116[1.47], I117[1.48], S120[1.51], T121[1.52], Y124[1.55], V152[2.55], A400[8.57], L401[8.58], W404                                                                                           |
|                                                                           | -14.4          | L190[3.41], C193[3.44], A194[3.45], I197[3.48], D198[3.49], R201[3.52], E221[4.45], W276[5.41], F280[5.45], L284[5.49], I288[5.53]                                                             |
|                                                                           | -13.7          | L123[1.54], Y124[1.55], Y127[1.58], L145[2.48], L148[2.51], L149[2.52], V152[2.55], I153[2.56]                                                                                                 |
|                                                                           | -12.8          | F278[5.43], F282[5.47], L286[5.51], A290[5.55], Y293[5.58], T294[5.59], F326[6.38], L337[6.49]                                                                                                 |
|                                                                           | -12.8          | I138[2.41], L145[2.48], L149[2.52], V214[4.38], T218[4.42], A219[4.43], I222[4.46], V223[4.47], W226[4.50]                                                                                     |
|                                                                           | -12.9          | C327[6.39], V331[6.43], L334[6.46], P338[6.50], M374[7.41], I384[7.51], A385[7.52], L388[7.55], V389[7.56]                                                                                     |
| Free Fatty Acid receptor FFAR1                                            |                |                                                                                                                                                                                                |
| Free fatty acid receptor FFAR1, residues renumbered, inactive, Human 4phu |                |                                                                                                                                                                                                |
| 4phu_EC                                                                   | -13.3          | L231[4.55], L234[4.58], L235[4.59], P239[4.63], A242, S243, A246, S247, L253, W257                                                                                                             |
|                                                                           | -13.2          | Q6, L7, F9, G10, V13, A14, A17, L18                                                                                                                                                            |
|                                                                           | -12.8          | W131, A132, L135[2.38], C136[2.39], G139[2.42], F142[2.45], G143[2.46], G149[2.52], W150[2.53], L158[2.61]                                                                                     |
|                                                                           | -12.7          | L133, H137[2.40], V141[2.44], S178[3.29], P181[3.32], A182[3.33], S185[3.36], L189[3.40]                                                                                                       |
|                                                                           | -12.5          | F192[3.43], L195[3.46], A199[3.50], L230[4.54], L234[4.58], A242, S243, A246, L253, W257                                                                                                       |
| 4phu_IC                                                                   | -12.4          | F20, V24, I27, R28, L53, L54, V57, V81, A85                                                                                                                                                    |
|                                                                           | -12.3          | A102[1.33], Y105[1.36], L106[1.37], L193[3.44], A196[3.47], I197[3.48], F200[3.51], C201[3.52]                                                                                                 |
|                                                                           | -13.9          | Y44, A99[1.30], A102[1.33], A103[1.34], V126[1.57], I130, L189[3.40], L193[3.44], I197[3.48]                                                                                                   |
| Histamine H1 receptor                                                     |                |                                                                                                                                                                                                |
| Histamine H1 receptor, inactive, Human 3rze                               |                |                                                                                                                                                                                                |
| 3rze_EC                                                                   | -14.1          | L154[4.52], L157[4.55], I160[4.58], P161[4.59], G164[4.62], W165, N166, H167, F190[5.38]                                                                                                       |
|                                                                           | -12.8          | S35[1.40], C38[1.43], V42[1.47], L46[1.51], L74[2.51], A78[2.55], P82[2.59], I85[2.62], L86[2.63], L89[2.66]                                                                                   |
| 3rze_IC                                                                   | -13.9          | L207[5.55], Y210[5.58], G418[6.38], A422[6.42], I425[6.45], L426[6.46], I429[6.49], I433[6.53]                                                                                                 |

| PDB <sup>a</sup>                                       | E <sup>b</sup> | Local Residues <sup>c</sup>                                                                                                       |
|--------------------------------------------------------|----------------|-----------------------------------------------------------------------------------------------------------------------------------|
| -13.8                                                  |                | L39[1.44], V42[1.47], G43[1.48], L46[1.51], I482[8.57], L483[8.58], H484[8.59], I485                                              |
| -13.1                                                  |                | L49[1.54], Y50[1.55], R53[1.58], V71[2.48], L74[2.51], I75[2.52], V79[2.56], F102[3.27], M106[3.31]                               |
| -13.3                                                  |                | L64[2.41], V67[2.44], S68[2.45], V71[2.48], F102[3.27], I148[4.46], W152[4.50], F156[4.54]                                        |
| Leukotriene BLT1 receptor                              |                |                                                                                                                                   |
| Leukotriene BLT1 receptor, inactive, Human 5x33        |                |                                                                                                                                   |
| 5x33_EC                                                | -14.5          | S28[1.42], M31[1.45], V32[1.46], L35[1.49], P36[1.50], P74[2.60], L77[2.63], H78[2.64], T81, W82                                  |
|                                                        | -13.8          | R93[3.28], Y97[3.32], V141[4.49], G145[4.53], F148[4.56], L149[4.57], T152[4.60], L155[4.63]                                      |
|                                                        | -13.4          | I19[1.33], A234[6.48], F235[6.49], P238[6.52], Q261[7.29], A265[7.33], V268[7.36], C269[7.37], L272[7.40]                         |
|                                                        | -13.3          | A234[6.48], L237[6.51], P238[6.52], V241[6.55], V242[6.56], V245[6.59], L262[7.30], A265[7.33]                                    |
|                                                        | -13.0          | L71[2.57], T72[2.58], F75[2.61], F87[3.22], A90[3.25], G91[3.26], L94[3.29], C95[3.30]                                            |
|                                                        | -12.9          | L64[2.50], A90[3.25], R93[3.28], L94[3.29], Y97[3.32], I98[3.33], F148[4.56], L155[4.63]                                          |
| 5x33_IC                                                | -15.1          | N61[2.47], L64[2.50], I98[3.33], V101[3.36], R137[4.45], L140[4.48], V141[4.49], W144[4.52], F148[4.56]                           |
|                                                        | -12.6          | L108[3.43], T111[3.46], A112[3.47], L115[3.50], D116[3.51], L139[4.47], A146[4.54], L150[4.58], F186[5.43]                        |
|                                                        | -12.4          | F196[5.53], V200[5.57], Y203[5.60], A204[5.61], S207[5.64], I229[6.43], L230[6.44], L237[6.51]                                    |
| Lysophosphatidic acid receptor 1                       |                |                                                                                                                                   |
| Lysophosphatidic acid receptor 1, inactive, Human 4z34 |                |                                                                                                                                   |
| 4z34_EC                                                | -16.0          | F97[2.52], L122[3.26], L123[3.27], G126[3.30], L127[3.31], T130[3.34], I176[4.54], G179[4.57], S183[4.61]                         |
|                                                        | -14.8          | I268[6.45], T272[6.49], P273[6.50], V276[6.53], L280[6.57], D288[7.30], Y292[7.34], F296[7.38]                                    |
|                                                        | -12.8          | L215[5.48], F218[5.51], V219[5.52], V222[5.55], T272[6.49], V276[6.53], L279[6.56], L280[6.57], C283[6.60]                        |
|                                                        | -12.0          | W45, M53[1.36], G54[1.37], I57[1.40], T58[1.41], I61[1.44], L65[1.48], F107[2.62]                                                 |
|                                                        | -11.6          | M64[1.47], L65[1.48], L68[1.51], F96[2.51], L100[2.55], F103[2.58], Y104[2.59], F107[2.62]                                        |
| 4z34_IC                                                | -13.0          | M71[1.54], Y75[1.58], Y86[2.41], A93[2.48], F97[2.52], I168[4.46], W172[4.50], I176[4.54]                                         |
|                                                        | -13.2          | M64[1.47], L65[1.48], L68[1.51], L69[1.52], F96[2.51], L100[2.55], I325[8.57], L326[8.58]                                         |
| Lysophosphatidic acid receptor 1, inactive, Human 4z35 |                |                                                                                                                                   |
| 4z35_EC                                                | -14.7          | F97[2.52], L123[3.27], L127[3.31], T130[3.34], W172[4.50], I176[4.54], G179[4.57], A180[4.58], S183[4.61]                         |
|                                                        | -13.0          | I212[5.45], L215[5.48], V219[5.52], V276[6.53], L279[6.56], L280[6.57], C283[6.60], C284[6.61]                                    |
|                                                        | -12.4          | I268[6.45], I269[6.46], T272[6.49], P273[6.50], V276[6.53], L280[6.57], C284[6.61], C287, D288[7.30]                              |
|                                                        | -11.7          | L140[3.44], M174[4.52], V177[4.55], M178[4.56], I181[4.59], W186, F209[5.42], F213[5.46]                                          |
| 4z35_IC                                                | -14.9          | M71[1.54], I74[1.57], Y75[1.58], Y86[2.41], A89[2.44], A93[2.48], I168[4.46], W172[4.50], I176[4.54]                              |
| Lysophosphatidic acid receptor 1, inactive, Human 4z36 |                |                                                                                                                                   |
| 4z36_EC                                                | -14.8          | F97[2.52], L122[3.26], L123[3.27], G126[3.30], L127[3.31], T130[3.34], W172[4.50], I176[4.54], G179[4.57], A180[4.58], S183[4.61] |
|                                                        | -12.5          | I268[6.45], I269[6.46], T272[6.49], P273[6.50], V276[6.53], L280[6.57], D288[7.30], Y292[7.34]                                    |
|                                                        | -12.2          | I212[5.45], L215[5.48], F218[5.51], V219[5.52], V222[5.55], I268[6.45], T272[6.49], V276[6.53], L279[6.56], C283[6.60]            |
| 4z36_IC                                                | -14.1          | M71[1.54], I74[1.57], Y75[1.58], Y86[2.41], A89[2.44], N90[2.45], I168[4.46], W172[4.50], I176[4.54]                              |
|                                                        | -12.6          | L140[3.44], I144[3.48], H147[3.51], I148[3.52], M174[4.52], M178[4.56], F213[5.46], L224[5.57]                                    |
|                                                        | -12.5          | L140[3.44], A141[3.45], I144[3.48], E145[3.49], I148[3.52], V167[4.45], V170[4.48], M178[4.56]                                    |
|                                                        | -13.0          | L68[1.51], M71[1.54], V72[1.55], Y75[1.58], V76[1.59], F96[2.51], F97[2.52], L100[2.55]                                           |
|                                                        | -12.4          | V222[5.55], F229[5.62], V261[6.38], G265[6.42], I268[6.45], I269[6.46], T272[6.49], V276[6.53]                                    |
|                                                        | -12.3          | I262[6.39], A266[6.43], I269[6.46], F296[7.38], L299[7.41], M306[7.48], Y313[7.55], R314[7.56]                                    |



| PDB <sup>a</sup>                                                | E <sup>b</sup> | Local Residues <sup>c</sup>                                                                                                              |
|-----------------------------------------------------------------|----------------|------------------------------------------------------------------------------------------------------------------------------------------|
| Muscarinic AChR                                                 |                |                                                                                                                                          |
| Muscarinic M1 receptor, inactive, Human 5cxv                    |                |                                                                                                                                          |
| 5cxv_EC                                                         | -14.2          | K20, Q24[1.31], F27[1.34], I28[1.35], T31[1.38], L86[2.65], T398[7.33], E401[7.36], L402[7.37], W405[7.40]                               |
|                                                                 | -13.3          | L376[6.46], T379[6.49], P380[6.50], I383[6.53], M384[6.54], V387[6.57], C394, V395, P396[7.31], L399[7.34]                               |
|                                                                 | -12.6          | V25[1.32], G29[1.36], G33[1.40], S36[1.43], L37[1.44], V40[1.47], T76[2.55], N80[2.59], T84[2.63], L87[2.66], M88[2.67]                  |
|                                                                 | -12.6          | Q110[3.37], M114[3.41], L156[4.56], W164[4.64], F182, I188[5.38], T192[5.42], A195[5.45], A196[5.46]                                     |
| 5cxv_IC                                                         | -14.9          | Y62[2.41], L65[2.44], S66[2.45], C69[2.48], A143[4.43], I146[4.46], G147[4.47], W150[4.50], F154[4.54]                                   |
|                                                                 | -12.8          | I73[2.52], L104[3.31], V107[3.34], A143[4.43], L144[4.44], G147[4.47], L148[4.48], W150[4.50], L151[4.51], F154[4.54]                    |
|                                                                 | -12.7          | A369[6.39], L376[6.46], L406[7.41], V409[7.44], I413[7.48], M416[7.51], C417[7.52], L420[7.55]                                           |
|                                                                 | -12.7          | S36[1.43], L37[1.44], V40[1.47], T41[1.48], L44[1.51], L45[1.52], I48[1.55], L432[8.57], L433[8.58], C435                                |
|                                                                 | -12.1          | L34[1.41], L37[1.44], A38[1.45], T41[1.48], G42[1.49], L45[1.52], M416[7.51], L420[7.55], F429[8.54], L433[8.58]                         |
| Muscarinic M2 receptor, inactive, Human 3uon                    |                |                                                                                                                                          |
| 3uon_EC                                                         | -14.9          | I26[1.35], V29[1.38], A30[1.39], L33[1.42], T81[2.62], T84[2.65], V85[2.66], T423[7.36], W427[7.40], I431[7.44]                          |
|                                                                 | -13.4          | N108[3.37], V111[3.40], M112[3.41], L154[4.56], W162[4.64], F180, F181, V186[5.38], T190[5.42], A193[5.45], A194[5.46]                   |
|                                                                 | -12.7          | V27[1.36], G31[1.40], S34[1.43], I38[1.47], N78[2.59], T81[2.62], L82[2.63], V85[2.66]                                                   |
|                                                                 | -12.3          | I398[6.46], A401[6.49], P402[6.50], V405[6.53], M406[6.54], C416, I417, P418[7.31], V421[7.34]                                           |
| 3uon_IC                                                         | -15.0          | L98[3.27], A101[3.30], L102[3.31], G141[4.43], I144[4.46], A145[4.47], W148[4.50], V149[4.51], F152[4.54]                                |
|                                                                 | -13.9          | V29[1.38], L33[1.42], V36[1.45], I431[7.44], T434[7.47], I435[7.48], A438[7.51], A441[7.54], L442[7.55], K448[8.51]                      |
|                                                                 | -13.2          | L35[1.44], I38[1.47], I39[1.48], I42[1.51], L43[1.52], V46[1.55], L454[8.57], L455[8.58]                                                 |
|                                                                 | -12.8          | A391[6.39], L394[6.42], A395[6.43], I398[6.46], L428[7.41], I431[7.44], I435[7.48], C439[7.52], C443[7.56]                               |
|                                                                 | -12.5          | M112[3.41], L115[3.44], F119[3.48], F123[3.52], M143[4.45], L150[4.52], L154[4.56], T190[5.42], A193[5.45], A194[5.46]                   |
|                                                                 | -12.2          | F195[5.47], Y196[5.48], V199[5.51], T203[5.55], Y206[5.58], W207[5.59], S210[5.62], I397[6.45], A401[6.49], N404[6.52], V405[6.53]       |
|                                                                 | -12.2          | S32[1.41], L35[1.44], V36[1.45], I39[1.48], L43[1.52], K448[8.51], F451[8.54], L455[8.58]                                                |
| Muscarinic M2 receptor, active state, agonist bound, Human 4mq5 |                |                                                                                                                                          |
| 4mq5_EC                                                         | -14.4          | E22[1.31], V23[1.32], F25[1.34], I26[1.35], V29[1.38], L33[1.42], I424[7.37], I431[7.44]                                                 |
|                                                                 | -12.5          | L394[6.42], I398[6.46], P402[6.50], V405[6.53], M406[6.54], I409[6.57], I417, V421[7.34]                                                 |
| 4mq5_IC                                                         | -14.6          | T203[5.55], Y206[5.58], W207[5.59], S210[5.62], I389[6.37], L390[6.38], L393[6.41], L394[6.42], I397[6.45]                               |
|                                                                 | -13.6          | F63[2.44], S64[2.45], I71[2.52], L102[3.31], I144[4.46], A145[4.47], W148[4.50], F152[4.54], A156[4.58]                                  |
|                                                                 | -13.4          | L35[1.44], I38[1.47], I39[1.48], I42[1.51], L43[1.52], V74[2.55], L454[8.57], L455[8.58]                                                 |
|                                                                 | -13.0          | A391[6.39], A395[6.43], I398[6.46], L428[7.41], I431[7.44], I435[7.48], A438[7.51], C439[7.52], C443[7.56]                               |
|                                                                 | -12.4          | V29[1.38], L33[1.42], V36[1.45], L43[1.52], I431[7.44], T434[7.47], I435[7.48], L442[7.55], F451[8.54]                                   |
|                                                                 | -13.4          | L28[1.37], S32[1.41], L35[1.44], V36[1.45], I39[1.48], L43[1.52], F451[8.54], L455[8.58]                                                 |
| Muscarinic M3 receptor, inactive, Rat 4daj                      |                |                                                                                                                                          |
| 4daj_EC                                                         | -13.5          | N152[3.37], V155[3.40], M156[3.41], L198[4.56], A202[4.60], W206[4.64], F224, T234[5.42], A237[5.45], A238[5.46], M241[5.49], P242[5.50] |
|                                                                 | -13.3          | V197[4.55], L198[4.56], P201[4.59], A202[4.60], F205[4.63], W206[4.64], Y208[4.66], F209[4.67]                                           |
|                                                                 | -13.3          | I70[1.35], A71[1.36], L73[1.38], T74[1.39], L77[1.42], I128[2.65], L527[7.37], W530[7.40], L531[7.41], I534[7.44]                        |
| 4daj_IC                                                         | -14.0          | Y104[2.41], L107[2.44], S108[2.45], C111[2.48], I115[2.52], I146[3.31], G189[4.47], W192[4.50], F196[4.54]                               |
|                                                                 | -13.1          | M156[3.41], L159[3.44], V160[3.45], F163[3.48], F167[3.52], M187[4.45], I194[4.52], L198[4.56], A237[5.45], A238[5.46], M241[5.49]       |
|                                                                 | -12.5          | A494[6.39], L497[6.42], A498[6.43], I501[6.46], T502[6.47], L531[7.41], I534[7.44], V538[7.48], C542[7.52], L545[7.55], C546[7.56]       |
| Muscarinic M4 receptor, inactive, Human 5dsg                    |                |                                                                                                                                          |
| 5dsg_EC                                                         | -14.6          | E31[1.31], F34[1.34], I35[1.35], V38[1.38], I93[2.65], T433[7.33], I437[7.37], W440[7.40], L441[7.41], V444[7.44]                        |

| PDB <sup>a</sup>                                                        | E <sup>b</sup> | Local Residues <sup>c</sup>                                                                                                                |
|-------------------------------------------------------------------------|----------------|--------------------------------------------------------------------------------------------------------------------------------------------|
|                                                                         | -13.9          | H24, T29[1.29], M32[1.32], V33[1.33], A36[1.36], G40[1.40], L44[1.44], N87[2.59], I94[2.66]                                                |
|                                                                         | -13.4          | L411[6.46], T414[6.49], P415[6.50], V418[6.53], M419[6.54], V422[6.57], C429, I430, P431[7.31], V434[7.34]                                 |
|                                                                         | -13.0          | V103[3.23], D106[3.26], L107[3.27], F161[4.54], L169[4.62], F170[4.63], Q172[4.65], R178                                                   |
|                                                                         | -12.2          | N117[3.37], M121[3.41], L163[4.56], F189, V195[5.38], T199[5.42], A202[5.45], A203[5.46]                                                   |
| 5dsg_IC                                                                 | -14.2          | Y69[2.41], F72[2.44], S73[2.45], I80[2.52], L111[3.31], G150[4.43], I153[4.46], A154[4.47], W157[4.50], F161[4.54]                         |
|                                                                         | -14.0          | R400[6.35], F403[6.38], A404[6.39], L407[6.42], L411[6.46], L441[7.41], I448[7.48], C452[7.52], C456[7.56]                                 |
|                                                                         | -13.4          | N117[3.37], M121[3.41], L124[3.44], I125[3.45], F128[3.48], F132[3.52], Y140, M152[4.45], L163[4.56], A202[5.45], A203[5.46]               |
|                                                                         | -13.2          | L42[1.42], V45[1.45], G49[1.49], L52[1.52], V444[7.44], T447[7.47], I448[7.48], P450[7.50], A451[7.51], A454[7.54], F464[8.54], L468[8.58] |
|                                                                         | -12.1          | M54[1.54], K58[1.58], F72[2.44], C76[2.48], L79[2.51], I80[2.52], F84[2.56], L111[3.31]                                                    |
|                                                                         | -12.0          | I51[1.51], M54[1.54], L55[1.55], K58[1.58], F72[2.44], L79[2.51], A83[2.55], F84[2.56]                                                     |
| Neuropeptide Y1 receptor                                                |                |                                                                                                                                            |
| Neuropeptide Y1 receptor, inactive, Human 5zbh                          |                |                                                                                                                                            |
| 5zbh_EC                                                                 | -12.9          | W129[3.41], L165[4.52], A168[4.55], S169[4.56], P172[4.59], Y211[5.38], L214[5.41], Q219[5.46]                                             |
|                                                                         | -12.5          | F84[2.48], I91[2.55], M92[2.56], F96[2.60], F108, G109[3.21], A111[3.23], M112[3.24]                                                       |
|                                                                         | -12.2          | V274[6.46], L277[6.49], P278[6.50], I281[6.53], F282[6.54], V285[6.57], L301[7.34], C305[7.38]                                             |
| 5zbh_IC                                                                 | -14.5          | W129[3.41], V132[3.44], L133[3.45], V136[3.48], W148, H154[4.41], G158[4.45], V161[4.48], L165[4.52]                                       |
|                                                                         | -13.2          | L66[1.58], I77[2.41], V80[2.44], N81[2.45], F84[2.48], Y156[4.43], I159[4.46], W163[4.50]                                                  |
| Neuropeptide Y1 receptor, inactive, Human 5zbq                          |                |                                                                                                                                            |
| 5zbq_EC                                                                 | -13.5          | L165[4.52], A168[4.55], S169[4.56], P172[4.59], I175[4.62], Y176[4.63], L214[5.41], L218[5.45]                                             |
|                                                                         | -12.2          | M39[1.31], T42[1.34], L43[1.35], A46[1.38], L300[7.33], L304[7.37], L307[7.40], I311[7.44]                                                 |
|                                                                         | -12.0          | I51[1.43], V55[1.47], L59[1.51], I91[2.55], P95[2.59], F96[2.60], V99[2.63], F108                                                          |
|                                                                         | -12.8          | I40[1.32], A44[1.36], G48[1.40], I51[1.43], I52[1.44], F98[2.62], V99[2.63], L102[2.66]                                                    |
| 5zbq_IC                                                                 | -13.4          | L66[1.58], I77[2.41], V80[2.44], F84[2.48], Y156[4.43], I159[4.46], W163[4.50], V167[4.54]                                                 |
|                                                                         | -12.6          | S267[6.39], V274[6.46], T308[7.41], V315[7.48], I318[7.51], F319[7.52], F322[7.55], Q328[8.51]                                             |
| Neurotensin NTS1 receptor                                               |                |                                                                                                                                            |
| Neurotensin receptor NTS1, active intermediate, agonist bound, Rat 3zev |                |                                                                                                                                            |
| 3zev_EC                                                                 | -13.6          | D60, Y62[1.30], S63[1.31], L66[1.34], V67[1.35], I70[1.38], Y349[7.33], M352[7.36], L353[7.37], L357[7.41], V360[7.44]                     |
|                                                                         | -12.6          | L199[4.55], L200[4.56], I202[4.58], P203[4.59], F206[4.62], T207[4.63], V229, T233[5.34], V237[5.38]                                       |
|                                                                         | -12.4          | L247[5.48], L251[5.52], L322[6.49], V326[6.53], L329[6.56], M330[6.57], Y333[6.60], I334[6.61]                                             |
|                                                                         | -12.7          | V319[6.46], L322[6.49], P323[6.50], V326[6.53], M330[6.57], I334[6.61], L343[7.27], F346[7.30], F350[7.34]                                 |
|                                                                         | -12.1          | A140[3.23], R143[3.26], G144[3.27], F147[3.30], W194[4.50], L195[4.51], A198[4.54], L205[4.61]                                             |
|                                                                         | -12.6          | L115[2.52], L119[2.56], V123[2.60], A136, F137, G138[3.21], G141[3.24], L148[3.31]                                                         |
| 3zev_IC                                                                 | -14.9          | F75[1.43], T79[1.47], V80[1.48], S83[1.51], V84[1.52], F87[1.55], L118[2.55], T383[8.57], L384[8.58], C386                                 |
|                                                                         | -14.2          | L247[5.48], L251[5.52], S254[5.55], T258[5.59], R311[6.38], V314[6.41], I315[6.42], V318[6.45], L322[6.49]                                 |
|                                                                         | -12.9          | Y104[2.41], L111[2.48], F147[3.30], I190[4.46], S191[4.47], W194[4.50], L195[4.51], A198[4.54]                                             |
|                                                                         | -13.3          | A69[1.37], I70[1.38], A73[1.41], V77[1.45], I367[7.51], N370[7.54], F380[8.54], L381[8.55]                                                 |
|                                                                         | -12.5          | A312[6.39], I315[6.42], A316[6.43], V319[6.46], C320[6.47], L353[7.37], L357[7.41], V360[7.44], L368[7.52]                                 |
|                                                                         | -12.8          | I70[1.38], L74[1.42], A356[7.40], L357[7.41], V360[7.44], I364[7.48], I367[7.51], L371[7.55]                                               |
| Neurotensin receptor NTS1, active intermediate, agonist bound, Rat 4buo |                |                                                                                                                                            |
| 4buo_EC                                                                 | -14.3          | D60, Y62[1.30], S63[1.31], L66[1.34], V67[1.35], I70[1.38], Y349[7.33], M352[7.36], L353[7.37], A356[7.40], L357[7.41], V360[7.44]         |

| PDB <sup>a</sup>                                                        | E <sup>b</sup> | Local Residues <sup>c</sup>                                                                                                                  |
|-------------------------------------------------------------------------|----------------|----------------------------------------------------------------------------------------------------------------------------------------------|
| 4buo_IC                                                                 | -13.6          | F75[1.43], T79[1.47], V80[1.48], S83[1.51], V84[1.52], F87[1.55], L118[2.55], P122[2.59], T383[8.57], L384[8.58]                             |
| Neurotensin receptor NTS1, active intermediate, agonist bound, Rat 4bv0 |                |                                                                                                                                              |
| 4bv0_EC                                                                 | -14.5          | D60, S63[1.31], L66[1.34], V67[1.35], I70[1.38], Y349[7.33], L353[7.37], A356[7.40], L357[7.41], V360[7.44]                                  |
|                                                                         | -12.7          | L111[2.48], L115[2.52], F119[2.56], F137, G138[3.21], A140[3.23], G141[3.24], L148[3.31]                                                     |
| 4bv0_IC                                                                 | -14.6          | T79[1.47], V80[1.48], G83[1.51], V84[1.52], F87[1.55], L118[2.55], F119[2.56], T383[8.57], L384[8.58], C386, L387                            |
|                                                                         | -14.0          | S254[5.55], N257[5.58], T258[5.59], A261[5.62], R311[6.38], V314[6.41], I315[6.42], V318[6.45], L322[6.49]                                   |
|                                                                         | -13.5          | Y104[2.41], G107[2.44], S108[2.45], L111[2.48], F147[3.30], I190[4.46], S191[4.47], W194[4.50], A198[4.54]                                   |
|                                                                         | -13.5          | G83[1.51], L86[1.54], F87[1.55], A90[1.58], L111[2.48], L114[2.51], L115[2.52], F119[2.56]                                                   |
| Neurotensin receptor NTS1, active state, Rat 4grv                       |                |                                                                                                                                              |
| 4grv_EC                                                                 | -14.0          | D60, S63[1.31], L66[1.34], V67[1.35], I70[1.38], Y349[7.33], M352[7.36], L353[7.37], A356[7.40], L357[7.41], A360[7.44]                      |
|                                                                         | -12.8          | K235[5.36], V236[5.37], Q239[5.40], V240[5.41], F243[5.44], M244[5.45], F248[5.49], Y333[6.60]                                               |
|                                                                         | -12.8          | L199[4.55], L200[4.56], I202[4.58], P203[4.59], F206[4.62], T207[4.63], V229, V237[5.38]                                                     |
|                                                                         | -13.0          | F75[1.43], T79[1.47], L118[2.55], P122[2.59], L125[2.62], Y126[2.63], W130[2.67], V131[2.68]                                                 |
| 4grv_IC                                                                 | -13.5          | Y104[2.41], S108[2.45], L111[2.48], F147[3.30], L148[3.31], K187[4.43], I190[4.46], S191[4.47], W194[4.50]                                   |
|                                                                         | -13.3          | M250[5.51], S254[5.55], T258[5.59], R311[6.38], V314[6.41], I315[6.42], V318[6.45], L322[6.49]                                               |
|                                                                         | -12.6          | I70[1.38], L74[1.42], L308[6.35], A312[6.39], I315[6.42], A316[6.43], V319[6.46], C320[6.47], A356[7.40], L357[7.41], A360[7.44], I364[7.48] |
|                                                                         | -12.2          | F75[1.43], T79[1.47], V80[1.48], S83[1.51], V84[1.52], F87[1.55], L118[2.55], P122[2.59]                                                     |
| Neurotensin receptor NTS1, active state, Rat 4xee                       |                |                                                                                                                                              |
| 4ee_EC                                                                  | -14.5          | D60, S63[1.31], L66[1.34], I70[1.38], Y349[7.33], M352[7.36], L353[7.37], A356[7.40], L357[7.41], A360[7.44]                                 |
|                                                                         | -13.3          | L247[5.48], L251[5.52], L322[6.49], V326[6.53], L329[6.56], M330[6.57], Y333[6.60], I334[6.61]                                               |
|                                                                         | -12.9          | A196[4.52], L199[4.55], L200[4.56], I202[4.58], P203[4.59], F206[4.62], T207[4.63], T233[5.34], V237[5.38]                                   |
|                                                                         | -12.7          | L72[1.40], F75[1.43], V76[1.44], T79[1.47], L125[2.62], Y126[2.63], W130[2.67], V131[2.68]                                                   |
|                                                                         | -12.5          | A140[3.23], R143[3.26], G144[3.27], F147[3.30], L195[4.51], A198[4.54], I202[4.58], L205[4.61]                                               |
|                                                                         | -12.6          | I61[1.29], V65[1.33], T68[1.36], A69[1.37], L72[1.40], A73[1.41], V76[1.44], W130[2.67]                                                      |
|                                                                         | -12.5          | F75[1.43], T79[1.47], L118[2.55], P122[2.59], V123[2.60], Y126[2.63], A136, F137                                                             |
| 4xee_IC                                                                 | -14.2          | S83[1.51], V84[1.52], L86[1.54], F87[1.55], L111[2.48], L114[2.51], L115[2.52], L118[2.55], L119[2.56]                                       |
|                                                                         | -13.3          | Y104[2.41], S108[2.45], L111[2.48], F147[3.30], L148[3.31], K187[4.43], I190[4.46], S191[4.47], W194[4.50]                                   |
|                                                                         | -13.3          | F75[1.43], T79[1.47], V80[1.48], S83[1.51], V84[1.52], L118[2.55], T383[8.57], L384[8.58]                                                    |
|                                                                         | -13.2          | M250[5.51], S254[5.55], T258[5.59], R311[6.38], V314[6.41], I315[6.42], V318[6.45], L322[6.49]                                               |
|                                                                         | -13.0          | I70[1.38], L74[1.42], A312[6.39], A316[6.43], A356[7.40], L357[7.41], A360[7.44], I364[7.48], L368[7.52]                                     |
|                                                                         | -12.8          | L158[3.41], K188[4.44], F189[4.45], A192[4.48], I193[4.49], A196[4.52], L200[4.56], V240[5.41], M244[5.45]                                   |
| Neurotensin receptor NTS1, active state, Rat 4xes                       |                |                                                                                                                                              |
| 4xes_EC                                                                 | -13.3          | D60, S63[1.31], L66[1.34], V67[1.35], I70[1.38], L74[1.42], Y349[7.33], M352[7.36], L353[7.37], A356[7.40], A360[7.44]                       |
|                                                                         | -12.9          | F246[5.47], L247[5.48], M250[5.51], L251[5.52], L322[6.49], V326[6.53], L329[6.56], M330[6.57], I334[6.61]                                   |
|                                                                         | -12.7          | L118[2.55], L119[2.56], V123[2.60], F137, G138[3.21], A140[3.23], G141[3.24], C142[3.25]                                                     |
| 4xes_IC                                                                 | -14.2          | A69[1.37], A73[1.41], V76[1.44], V77[1.45], V80[1.48], F380[8.54], L381[8.55], T383[8.57]                                                    |
|                                                                         | -13.6          | L111[2.48], L115[2.52], L119[2.56], L148[3.31], K187[4.43], I190[4.46], S191[4.47], W194[4.50]                                               |
|                                                                         | -13.4          | F246[5.47], M250[5.51], S254[5.55], T258[5.59], R311[6.38], V314[6.41], V318[6.45], L322[6.49]                                               |
|                                                                         | -13.1          | I70[1.38], L74[1.42], V77[1.45], A356[7.40], L357[7.41], A360[7.44], I364[7.48], I367[7.51], F380[8.54]                                      |
|                                                                         | -13.0          | S83[1.51], L86[1.54], F87[1.55], L111[2.48], L114[2.51], L115[2.52], L118[2.55], L119[2.56]                                                  |
|                                                                         | -12.7          | I70[1.38], L74[1.42], A312[6.39], A316[6.43], A356[7.40], L357[7.41], A360[7.44], I364[7.48], L368[7.52]                                     |
|                                                                         | -13.0          | F75[1.43], T79[1.47], V80[1.48], S83[1.51], V84[1.52], F87[1.55], L118[2.55], P122[2.59]                                                     |

| PDB <sup>a</sup>                                  | E <sup>b</sup> | Local Residues <sup>c</sup>                                                                                                                               |
|---------------------------------------------------|----------------|-----------------------------------------------------------------------------------------------------------------------------------------------------------|
| Neurotensin receptor NTS1, active state, Rat 5t04 |                |                                                                                                                                                           |
| 5t04_EC                                           | -13.1          | D60, S63[1.31], L66[1.34], V67[1.35], I70[1.38], L74[1.42], Y349[7.33], M352[7.36], L353[7.37], L357[7.41], A360[7.44]                                    |
|                                                   | -12.7          | D139[3.22], A140[3.23], R143[3.26], G144[3.27], F147[3.30], L148[3.31], L195[4.51], A198[4.54], L205[4.61]                                                |
|                                                   | -13.3          | L111[2.48], L115[2.52], L119[2.56], F137, A140[3.23], G141[3.24], G144[3.27], L148[3.31]                                                                  |
|                                                   | -12.9          | L247[5.48], M250[5.51], L251[5.52], L322[6.49], V326[6.53], L329[6.56], M330[6.57], Y333[6.60], I334[6.61]                                                |
|                                                   | -12.5          | T68[1.36], L72[1.40], F75[1.43], T79[1.47], P122[2.59], L125[2.62], Y126[2.63], W130[2.67], V131[2.68]                                                    |
|                                                   | -12.2          | V319[6.46], L322[6.49], P323[6.50], V326[6.53], M330[6.57], I334[6.61], F346[7.30], F350[7.34]                                                            |
| 5t04_IC                                           | -14.0          | M250[5.51], S254[5.55], T258[5.59], R311[6.38], V314[6.41], I315[6.42], V318[6.45], L322[6.49]                                                            |
|                                                   | -13.5          | Y104[2.41], L111[2.48], L115[2.52], L119[2.56], L148[3.31], K187[4.43], I190[4.46], S191[4.47], W194[4.50]                                                |
|                                                   | -13.0          | L86[1.54], F87[1.55], A90[1.58], L111[2.48], L114[2.51], L115[2.52], L118[2.55], L119[2.56]                                                               |
|                                                   | -12.3          | I70[1.38], L308[6.35], A312[6.39], I315[6.42], A316[6.43], V319[6.46], C320[6.47], L353[7.37], A356[7.40], L357[7.41], A360[7.44], I364[7.48], L368[7.52] |
| Opioid receptor                                   |                |                                                                                                                                                           |
| Opioid delta receptor, inactive, Mouse 4ej4       |                |                                                                                                                                                           |
| 4ej4_EC                                           | -12.7          | V271[6.45], V272[6.46], A275[6.49], P276[6.50], I279[6.53], F280[6.54], V283[6.57], I289, V296[7.31]                                                      |
|                                                   | -12.7          | L175[4.52], G178[4.55], V179[4.56], P182[4.59], M186[4.63], F202, W209[5.34], V212[5.37], T213[5.38], F220[5.45]                                          |
|                                                   | -12.6          | T53[1.36], S57[1.40], A61[1.44], L65[1.48], P103[2.58], S106[2.61], A107[2.62], L110[2.65], M111[2.66], F116                                              |
|                                                   | -12.6          | F218[5.43], F222[5.47], V223[5.48], I226[5.51], L227[5.52], I279[6.53], I282[6.56], V283[6.57], L286[6.60], V287[6.61]                                    |
| 4ej4_IC                                           | -14.6          | F89[2.44], N90[2.45], L93[2.48], L97[2.52], Y130[3.34], K166[4.43], N169[4.46], I170[4.47], W173[4.50]                                                    |
|                                                   | -12.6          | V144[3.48], Y147[3.51], I148[3.52], V224[5.49], L227[5.52], I228[5.53], V231[5.56], C232[5.57]                                                            |
|                                                   | -12.3          | R261[6.35], V265[6.39], A269[6.43], V272[6.46], L302[7.37], L306[7.41], L313[7.48], L317[7.52]                                                            |
|                                                   | -12.8          | F137[3.41], M141[3.45], V144[3.48], F159, K164[4.41], L167[4.44], I168[4.45], L175[4.52], F220[5.45], V224[5.49], P225[5.50]                              |
|                                                   | -13.7          | F222[5.47], R261[6.35], L264[6.38], V265[6.39], G268[6.42], V271[6.45], V272[6.46], A275[6.49], I279[6.53]                                                |
| Opioid delta receptor, inactive, Human 4n6h       |                |                                                                                                                                                           |
| 4n6h_EC                                           | -15.1          | F133[3.37], F137[3.41], L175[4.52], G178[4.55], V179[4.56], F202, W209[5.34], V212[5.37], T213[5.38], C216[5.41], F220[5.45]                              |
|                                                   | -13.7          | V272[6.46], A275[6.49], P276[6.50], I279[6.53], F280[6.54], V283[6.57], I289, V296[7.31], A299[7.34], C303[7.38]                                          |
|                                                   | -12.7          | S44[1.27], A47[1.30], L48[1.31], A51[1.34], L55[1.38], P294[7.29], A298[7.33], L302[7.37]                                                                 |
|                                                   | -12.4          | F218[5.43], F222[5.47], I226[5.51], A275[6.49], I279[6.53], I282[6.56], V283[6.57], V287[6.61]                                                            |
|                                                   | -12.0          | T53[1.36], S57[1.40], A61[1.44], L65[1.48], P103[2.58], S106[2.61], A107[2.62], L110[2.65]                                                                |
|                                                   | -11.9          | L64[1.47], M71[1.54], L93[2.48], A96[2.51], L97[2.52], S100[2.55], L119[3.23], L120[3.24], A123[3.27]                                                     |
|                                                   | -12.3          | L93[2.48], L119[3.23], K122[3.26], A123[3.27], S126[3.30], Y130[3.34], W173[4.50], M184[4.61]                                                             |
| 4n6h_IC                                           | -13.6          | I74[1.57], V75[1.58], K81, I86[2.41], F89[2.44], K166[4.43], N169[4.46], I170[4.47], W173[4.50]                                                           |
|                                                   | -13.6          | L64[1.47], L65[1.48], V68[1.51], L69[1.52], F72[1.55], L332[8.57], C333[8.58], K335[8.60], P336                                                           |
| Opioid delta receptor, inactive, Human 4rwa       |                |                                                                                                                                                           |
| 4rwa_EC                                           | -13.4          | S44[1.27], A47[1.30], L48[1.31], A51[1.34], L55[1.38], P294[7.29], L295[7.30], A298[7.33], L302[7.37]                                                     |
|                                                   | -13.2          | V272[6.46], A275[6.49], P276[6.50], I279[6.53], F280[6.54], V283[6.57], I289, V296[7.31], A299[7.34]                                                      |
|                                                   | -12.7          | F137[3.41], L175[4.52], V179[4.56], Y208[5.33], W209[5.34], V212[5.37], T213[5.38], C216[5.41], F220[5.45]                                                |
|                                                   | -12.6          | V174[4.51], L175[4.52], G178[4.55], V181[4.58], P182[4.59], V185[4.62], M186[4.63], W209[5.34]                                                            |
| 4rwa_IC                                           | -14.3          | A58[1.41], A61[1.44], V62[1.45], L65[1.48], L69[1.52], F329[8.54], R330[8.55], L332[8.57], C333[8.58]                                                     |
|                                                   | -13.1          | V75[1.58], K81, I86[2.41], F89[2.44], L93[2.48], Y130[3.34], K166[4.43], I170[4.47], W173[4.50]                                                           |
|                                                   | -12.4          | F222[5.47], I226[5.51], T230[5.55], Y233[5.58], L237[5.62], L264[6.38], V271[6.45], A275[6.49], I279[6.53]                                                |
|                                                   | -12.9          | L55[1.38], A58[1.41], V62[1.45], V316[7.51], A319[7.54], F320[7.55], F329[8.54], R330[8.55]                                                               |
|                                                   | -12.4          | V68[1.51], M71[1.54], F72[1.55], V75[1.58], R76[1.59], L93[2.48], L97[2.52], S100[2.55]                                                                   |

| PDB <sup>a</sup>                                            | E <sup>b</sup> | Local Residues <sup>c</sup>                                                                                                                    |
|-------------------------------------------------------------|----------------|------------------------------------------------------------------------------------------------------------------------------------------------|
|                                                             | -12.3          | F137[3.41], T140[3.44], M141[3.45], V144[3.48], Y147[3.51], I148[3.52], H152[3.56], L175[4.52], F220[5.45], V224[5.49], I228[5.53]             |
|                                                             | -12.4          | L55[1.38], L306[7.41], A309[7.44], L313[7.48], V316[7.51], L317[7.52], F320[7.55], L321[7.56]                                                  |
| Opioid delta receptor, inactive, Human 4rwd                 |                |                                                                                                                                                |
| 4rwd_EC                                                     | -14.5          | L175[4.52], G178[4.55], V179[4.56], P182[4.59], M186[4.63], F202, W209[5.34], D210[5.35], V212[5.37], T213[5.38], C216[5.41], F220[5.45]       |
|                                                             | -13.4          | V272[6.46], A275[6.49], P276[6.50], I279[6.53], F280[6.54], V283[6.57], I289, V296[7.31], A299[7.34], C303[7.38]                               |
|                                                             | -12.6          | F218[5.43], F222[5.47], V223[5.48], I226[5.51], I279[6.53], I282[6.56], V283[6.57], V287[6.61]                                                 |
|                                                             | -12.0          | S57[1.40], C60[1.43], A61[1.44], P103[2.58], S106[2.61], A107[2.62], L110[2.65], M111[2.66]                                                    |
| 4rwd_IC                                                     | -16.1          | I74[1.57], V75[1.58], K81, I86[2.41], F89[2.44], N90[2.45], L93[2.48], Y130[3.34], K166[4.43], N169[4.46], I170[4.47], W173[4.50], S177[4.54]  |
|                                                             | -12.8          | F137[3.41], T140[3.44], V144[3.48], Y147[3.51], K155, F159, L175[4.52], F220[5.45], V224[5.49], P225[5.50], I228[5.53]                         |
|                                                             | -12.5          | F222[5.47], V223[5.48], I226[5.51], T230[5.55], Y233[5.58], L237[5.62], L264[6.38], V271[6.45]                                                 |
| Opioid kappa receptor, inactive, Human 4djh                 |                |                                                                                                                                                |
| 4djh_EC                                                     | -14.0          | Y66[1.39], S67[1.40], F70[1.43], V71[1.44], P113[2.58], S116[2.61], T117[2.62], L120[2.65]                                                     |
|                                                             | -13.5          | F143[3.37], F147[3.41], L185[4.52], S188[4.55], V189[4.56], S192[4.59], L196[4.63], W222[5.34], F225[5.37], M226[5.38], C229[5.41], F233[5.45] |
| 4djh_IC                                                     | -13.6          | F99[2.44], L103[2.48], L107[2.52], I137[3.31], Y140[3.34], K176[4.43], I180[4.47], W183[4.50]                                                  |
|                                                             | -12.4          | A64[1.37], S67[1.40], V68[1.41], V71[1.44], V72[1.45], V75[1.48], L79[1.52], F341[8.54], C345[8.58]                                            |
|                                                             | -11.9          | Y246[5.58], I250[5.62], L277[6.38], A281[6.42], V284[6.45], V285[6.46], T288[6.49], P289[6.50]                                                 |
|                                                             | -11.8          | R274[6.35], V278[6.39], V282[6.43], V285[6.46], L318[7.41], T321[7.44], L325[7.48], L329[7.52], L333[7.56]                                     |
| Opioid kappa receptor, active, with cholesterol, Human 6b73 |                |                                                                                                                                                |
| 6b73_EC                                                     | -12.9          | F147[3.41], L185[4.52], S188[4.55], V189[4.56], S192[4.59], L196[4.63], W222[5.34], F225[5.37], M226[5.38], F233[5.45], I237[5.49]             |
|                                                             | -12.6          | V284[6.45], V285[6.46], T288[6.49], P289[6.50], I292[6.53], F293[6.54], V296[6.57], T302                                                       |
|                                                             | -12.0          | L107[2.52], K132[3.26], I133[3.27], S136[3.30], I137[3.31], Y140[3.34], N141[3.35], I194[4.61]                                                 |
|                                                             | -12.0          | F231[5.43], F235[5.47], V239[5.51], L240[5.52], I292[6.53], L295[6.56], V296[6.57], L299[6.60]                                                 |
|                                                             | -12.0          | F70[1.43], V71[1.44], V75[1.48], P113[2.58], S116[2.61], T117[2.62], L120[2.65], M121[2.66]                                                    |
| 6b73_IC                                                     | -13.4          | M90, I96[2.41], F99[2.44], N100[2.45], L103[2.48], Y140[3.34], K176[4.43], N179[4.46], W183[4.50]                                              |
|                                                             | -13.2          | V154[3.48], Y157[3.51], I158[3.52], V236[5.48], I237[5.49], L240[5.52], I241[5.53], V244[5.56], C245[5.57]                                     |
| Opioid mu receptor, inactive, with cholesterol, Mouse 4dkl  |                |                                                                                                                                                |
| 4dkl_EC                                                     | -14.2          | L194[4.52], A197[4.55], I198[4.56], F221, W228[5.34], L231[5.37], L232[5.38], C235[5.41]                                                       |
|                                                             | -14.0          | I290[6.45], V291[6.46], T294[6.49], P295[6.50], I298[6.53], Y299[6.54], I302[6.57], I308, P309, F313[7.30], S317[7.34]                         |
|                                                             | -12.7          | F237[5.43], F241[5.47], I242[5.48], V245[5.51], I298[6.53], I301[6.56], I302[6.57], L305[6.60], I306[6.61]                                     |
| 4dkl_IC                                                     | -13.7          | F108[2.44], L112[2.48], L116[2.52], I146[3.31], Y149[3.34], K185[4.43], V189[4.47], W192[4.50]                                                 |
|                                                             | -13.2          | V245[5.51], Y252[5.58], L283[6.38], V284[6.39], V286[6.41], A287[6.42], I290[6.45], T294[6.49], I298[6.53]                                     |
|                                                             | -12.3          | Y106[2.42], C159[3.44], T160[3.45], V163[3.48], D164[3.49], V187[4.45], L194[4.52], F239[5.45], I247[5.53]                                     |
| Opioid mu receptor, active, with cholesterol, Mouse 5c1m    |                |                                                                                                                                                |
| 5c1m_EC                                                     | -15.4          | L194[4.52], A197[4.55], I198[4.56], P201[4.59], M205[4.63], F221, S222, W228[5.34], L231[5.37], C235[5.41], F239[5.45]                         |
|                                                             | -14.4          | I290[6.45], T294[6.49], P295[6.50], I298[6.53], Y299[6.54], I302[6.57], I308, F313[7.30], Q314[7.31], S317[7.34]                               |
|                                                             | -13.6          | V291[6.46], P295[6.50], Y299[6.54], I302[6.57], I308, F313[7.30], Q314[7.31], S317[7.34], F320[7.37], C321[7.38], L324[7.41]                   |
| 5c1m_IC                                                     | -13.6          | Y166[3.51], I238[5.44], F239[5.45], M243[5.49], L246[5.52], I247[5.53], V250[5.56], C251[5.57], L254[5.60]                                     |
|                                                             | -13.1          | M99, I105[2.41], F108[2.44], N109[2.45], L112[2.48], I146[3.31], Y149[3.34], K185[4.43], N188[4.46], W192[4.50]                                |
|                                                             | -12.6          | T249[5.55], Y252[5.58], G253[5.59], I256[5.62], V282[6.37], L283[6.38], V286[6.41], I290[6.45]                                                 |

| PDB <sup>a</sup>                          | E <sup>b</sup> | Local Residues <sup>c</sup>                                                                                                        |
|-------------------------------------------|----------------|------------------------------------------------------------------------------------------------------------------------------------|
|                                           | -12.6          | F237[5.43], F241[5.47], I242[5.48], V245[5.51], L246[5.52], T249[5.55], G253[5.59], I256[5.62], L283[6.38], V286[6.41], I290[6.45] |
|                                           | -12.5          | F87[1.51], M90[1.54], Y91[1.55], V94[1.58], R95[1.59], L112[2.48], L116[2.52], I146[3.31]                                          |
|                                           | -12.5          | L74[1.38], I77[1.41], V81[1.45], F84[1.48], L88[1.52], T327[7.44], C330[7.47], L331[7.48], V334[7.51], F338[7.55]                  |
| Opioid NOP receptor, inactive, Human 4ea3 |                |                                                                                                                                    |
| 4ea3_EC                                   | -13.5          | L95[2.48], L99[2.52], K124[3.26], T125[3.27], A128[3.30], Y132[3.34], W175[4.50], V183[4.58], A186[4.61], I187[4.62]               |
|                                           | -13.3          | F135[3.37], F139[3.41], L177[4.52], V180[4.55], V181[4.56], P184[4.59], F215[5.38], C218[5.41], I219[5.42], F222[5.45], V226[5.49] |
|                                           | -11.9          | L50[1.31], A299[7.33], I300[7.34], F303[7.37], C304[7.38], L307[7.41], V310[7.44], L314[7.48]                                      |
| 4ea3_IC                                   | -14.7          | L77[1.58], F91[2.44], L95[2.48], Y132[3.34], Q168[4.43], N171[4.46], V172[4.47], W175[4.50], S179[4.54], V183[4.58]                |
|                                           | -13.0          | I231[5.54], S232[5.55], Y235[5.58], S236[5.59], I239[5.62], L266[6.38], A270[6.42], V273[6.45], G274[6.46], T277[6.49]             |
|                                           | -12.7          | L57[1.38], A60[1.41], G64[1.45], G68[1.49], L71[1.52], C313[7.47], P316[7.50], I317[7.51], A320[7.54], F330[8.54]                  |
|                                           | -12.7          | F139[3.41], T142[3.44], A143[3.45], V146[3.48], V170[4.45], L177[4.52], F222[5.45], V230[5.53]                                     |
|                                           | -13.3          | V146[3.48], Y149[3.51], F222[5.45], V226[5.49], L229[5.52], V230[5.53], V233[5.56], C234[5.57]                                     |
|                                           | -12.8          | R263[6.35], L266[6.38], V267[6.39], A270[6.42], V271[6.43], G274[6.46], P278[6.50], L307[7.41]                                     |
|                                           | -12.7          | L57[1.38], V267[6.39], V271[6.43], L307[7.41], V310[7.44], L314[7.48], L318[7.52], L322[7.56]                                      |
| Opioid NOP receptor, inactive, Human 5dhg |                |                                                                                                                                    |
| 5dhg_EC                                   | -13.7          | L95[2.48], L99[2.52], K124[3.26], T125[3.27], A128[3.30], Y132[3.34], W175[4.50], V183[4.58], A186[4.61], I187[4.62]               |
|                                           | -12.9          | F139[3.41], L177[4.52], V180[4.55], V181[4.56], P184[4.59], M188[4.63], P205, W211[5.34], F215[5.38], I219[5.42], F222[5.45]       |
|                                           | -11.8          | L50[1.31], T296[7.30], A299[7.33], I300[7.34], F303[7.37], L307[7.41], V310[7.44], L314[7.48]                                      |
| 5dhg_IC                                   | -14.1          | L77[1.58], F91[2.44], L95[2.48], Y132[3.34], Q168[4.43], V172[4.47], W175[4.50], S179[4.54]                                        |
| Opioid NOP receptor, inactive, Human 5dhh |                |                                                                                                                                    |
| 5dhh_EC                                   | -12.9          | F135[3.37], F139[3.41], L177[4.52], V181[4.56], P184[4.59], M188[4.63], P205, W211[5.34], F215[5.38], F222[5.45]                   |
|                                           | -12.5          | L99[2.52], A121[3.23], K124[3.26], T125[3.27], A128[3.30], I129[3.31], Y132[3.34], A186[4.61]                                      |
| 5dhh_IC                                   | -14.5          | I88[2.41], F91[2.44], L95[2.48], Y132[3.34], Q168[4.43], N171[4.46], V172[4.47], W175[4.50], V183[4.58]                            |
|                                           | -13.2          | F139[3.41], T142[3.44], A143[3.45], V146[3.48], V170[4.45], L177[4.52], F222[5.45], V230[5.53]                                     |
|                                           | -13.2          | C70[1.51], Y74[1.55], L77[1.58], R78[1.59], T98[2.51], L99[2.52], L102[2.55], I129[3.31]                                           |
|                                           | -12.8          | V146[3.48], Y149[3.51], F222[5.45], V226[5.49], L229[5.52], V230[5.53], V233[5.56], C234[5.57], L237[5.60]                         |
| Opsin                                     |                |                                                                                                                                    |
| Opsin, Bovine 3cap                        |                |                                                                                                                                    |
| 3cap_EC                                   | -14.2          | V81[2.48], F85[2.52], F88[2.55], G89[2.56], T93[2.60], F105, G109[3.24], L112[3.27], E113[3.28], F116[3.31]                        |
|                                           | -13.3          | W35[1.30], Q36[1.31], M39[1.34], Y43[1.38], L46[1.41], L50[1.45], I286[7.33], F293[7.40]                                           |
|                                           | -12.9          | L262[6.45], I263[6.46], L266[6.49], P267[6.50], G270[6.53], V271[6.54], Y274[6.57], F287[7.34]                                     |
|                                           | -12.7          | L216[5.51], L262[6.45], L266[6.49], G270[6.53], F273[6.56], Y274[6.57], T277[6.60], H278[6.61]                                     |
|                                           | -12.5          | I48[1.43], M49[1.44], F52[1.47], P53[1.48], F88[2.55], T92[2.59], Y96[2.63], F105                                                  |
|                                           | -12.3          | A158[4.47], W161[4.50], V162[4.51], L165[4.54], A166[4.55], A169[4.58], P170[4.59], V173[4.62], W175                               |
|                                           | -12.0          | L262[6.45], I263[6.46], L266[6.49], P267[6.50], I286[7.33], F287[7.34], I290[7.37], F294[7.41]                                     |
| 3cap_IC                                   | -14.3          | F208[5.43], F212[5.47], I213[5.48], L216[5.51], I217[5.52], F220[5.55], F221[5.56], G224[5.59], Q225[5.60], L266[6.49]             |
|                                           | -13.0          | W126[3.41], I133[3.48], Y136[3.51], F159[4.48], M163[4.52], Y206[5.41], V210[5.45], I214[5.49], V218[5.53], F221[5.56], C222[5.57] |
|                                           | -12.9          | I133[3.48], E134[3.49], V137[3.52], F148, M155[4.44], G156[4.45], F159[4.48], V162[4.51]                                           |
|                                           | -12.5          | T62[1.57], Y74[2.41], L77[2.44], N78[2.45], V81[2.48], F85[2.52], F116[3.31], W161[4.50]                                           |
| Opsin, Bovine 3dqb                        |                |                                                                                                                                    |

| PDB <sup>a</sup>     | E <sup>b</sup> | Local Residues <sup>c</sup>                                                                                            |
|----------------------|----------------|------------------------------------------------------------------------------------------------------------------------|
| 3dq <sub>b</sub> _EC | -14.2          | V81[2.48], L84[2.51], F85[2.52], F88[2.55], G89[2.56], T93[2.60], F105, G109[3.24], L112[3.27], E113[3.28], F116[3.31] |
|                      | -13.1          | I259[6.42], L262[6.45], I263[6.46], L266[6.49], P267[6.50], G270[6.53], V271[6.54], Y274[6.57], F283, F287[7.34]       |
|                      | -13.1          | F159[4.48], V162[4.51], M163[4.52], A166[4.55], A169[4.58], P170[4.59], V173[4.62], W175                               |
|                      | -12.6          | W35[1.30], Q36[1.31], M39[1.34], L40[1.35], Y43[1.38], L46[1.41], I286[7.33], F293[7.40]                               |
|                      | -13.7          | L216[5.51], F220[5.55], L262[6.45], L266[6.49], G270[6.53], F273[6.56], Y274[6.57], H278[6.61]                         |
|                      | -13.0          | I48[1.43], M49[1.44], F52[1.47], P53[1.48], F88[2.55], T92[2.59], Y96[2.63], F105                                      |
|                      | -13.0          | W175, S202[5.37], F203[5.38], I205[5.40], Y206[5.41], V209[5.44], V210[5.45], I214[5.49]                               |
| 3dq <sub>b</sub> _IC | -14.0          | F208[5.43], F212[5.47], I213[5.48], L216[5.51], I217[5.52], F220[5.55], F221[5.56], G224[5.59], Q225[5.60]             |
|                      | -13.5          | L59[1.54], T62[1.57], V63[1.58], R69, L77[2.44], V81[2.48], F85[2.52], F116[3.31], W161[4.50]                          |
|                      | -13.2          | I133[3.48], Y136[3.51], F159[4.48], M163[4.52], V210[5.45], I214[5.49], V218[5.53], F221[5.56], C222[5.57]             |
| Opsin, Bovine 4j4q   |                |                                                                                                                        |
| 4j4q_EC              | -15.2          | F88[2.55], G89[2.56], T93[2.60], F103, F105, G109[3.24], L112[3.27], E113[3.28]                                        |
|                      | -13.5          | V162[4.51], M163[4.52], A166[4.55], A169[4.58], P170[4.59], V173[4.62], G174, W175, Y206[5.41]                         |
|                      | -12.8          | I259[6.42], L262[6.45], I263[6.46], L266[6.49], P267[6.50], G270[6.53], V271[6.54], Y274[6.57], F283, F287[7.34]       |
| 4j4q_IC              | -13.2          | F208[5.43], F212[5.47], I213[5.48], L216[5.51], I217[5.52], F220[5.55], F221[5.56], Q225[5.60]                         |
|                      | -12.7          | Y43[1.38], L46[1.41], R252[6.35], I256[6.39], F293[7.40], Y301[7.48], V304[7.51], M309[7.56]                           |
|                      | -12.4          | F220[5.55], G224[5.59], V227[5.62], V254[6.37], I255[6.38], V258[6.41], I259[6.42], L262[6.45]                         |
| Opsin, Bovine 4pxf   |                |                                                                                                                        |
| 4pxf_EC              | -14.5          | F88[2.55], G89[2.56], T93[2.60], F103, F105, G109[3.24], C110[3.25], L112[3.27], E113[3.28]                            |
|                      | -13.4          | W35[1.30], Q36[1.31], M39[1.34], L40[1.35], Y43[1.38], M183, I286[7.33], F293[7.40]                                    |
|                      | -13.0          | L216[5.51], F220[5.55], L262[6.45], L266[6.49], G270[6.53], F273[6.56], Y274[6.57], T277[6.60], H278[6.61]             |
|                      | -13.0          | I259[6.42], L262[6.45], I263[6.46], L266[6.49], P267[6.50], G270[6.53], V271[6.54], Y274[6.57], F283, F287[7.34]       |
|                      | -12.2          | F159[4.48], V162[4.51], M163[4.52], A166[4.55], P170[4.59], V173[4.62], W175, Y206[5.41]                               |
|                      | -12.4          | W175, S202[5.37], F203[5.38], I205[5.40], Y206[5.41], V209[5.44], V210[5.45], I214[5.49]                               |
| 4pxf_IC              | -12.9          | F212[5.47], I213[5.48], L216[5.51], I217[5.52], F220[5.55], F221[5.56], G224[5.59], Q225[5.60], L266[6.49]             |
|                      | -12.8          | I133[3.48], Y136[3.51], F159[4.48], M163[4.52], Y206[5.41], V210[5.45], I214[5.49], V218[5.53], F221[5.56], C222[5.57] |
| Opsin, Bovine 4x1h   |                |                                                                                                                        |
| 4x1h_EC              | -14.6          | F88[2.55], G89[2.56], T93[2.60], F103, F105, G109[3.24], L112[3.27], E113[3.28]                                        |
|                      | -13.2          | I259[6.42], L262[6.45], I263[6.46], L266[6.49], P267[6.50], G270[6.53], V271[6.54], Y274[6.57], F283, F287[7.34]       |
|                      | -12.8          | Q36[1.31], F37[1.32], M39[1.34], L40[1.35], Y43[1.38], M183, I286[7.33], F293[7.40]                                    |
|                      | -12.3          | W175, E201[5.36], S202[5.37], I205[5.40], Y206[5.41], V209[5.44], V210[5.45], I214[5.49]                               |
|                      | -12.4          | F159[4.48], V162[4.51], A166[4.55], A169[4.58], P170[4.59], V173[4.62], W175, Y206[5.41]                               |
|                      | -14.7          | L59[1.54], T62[1.57], V63[1.58], L77[2.44], V81[2.48], F85[2.52], F116[3.31], L119[3.34], W161[4.50]                   |
| 4x1h_IC              | -13.2          | F208[5.43], F212[5.47], I213[5.48], L216[5.51], I217[5.52], F220[5.55], F221[5.56], Q225[5.60]                         |
|                      | -12.7          | I133[3.48], Y136[3.51], F159[4.48], M163[4.52], V210[5.45], I214[5.49], V218[5.53], F221[5.56]                         |
|                      |                |                                                                                                                        |
| Opsin, Bovine 5te3   |                |                                                                                                                        |
| 5te3_EC              | -14.5          | F88[2.55], G89[2.56], T93[2.60], F103, F105, G109[3.24], L112[3.27], E113[3.28]                                        |
|                      | -14.1          | F159[4.48], V162[4.51], M163[4.52], A166[4.55], A169[4.58], P170[4.59], V173[4.62], G174, W175                         |
|                      | -13.6          | Q36[1.31], F37[1.32], M39[1.34], L40[1.35], Y43[1.38], M183, I286[7.33], F293[7.40]                                    |
|                      | -12.8          | I259[6.42], L262[6.45], I263[6.46], L266[6.49], P267[6.50], G270[6.53], V271[6.54], Y274[6.57], F287[7.34]             |
|                      | -13.5          | L216[5.51], L262[6.45], L266[6.49], G270[6.53], F273[6.56], Y274[6.57], T277[6.60], H278[6.61]                         |
|                      | -12.4          | I48[1.43], M49[1.44], F52[1.47], P53[1.48], F88[2.55], T92[2.59], Y96[2.63], F105                                      |
| 5te3_IC              | -12.9          | F208[5.43], F212[5.47], I213[5.48], L216[5.51], I217[5.52], F220[5.55], F221[5.56], L266[6.49]                         |

| PDB <sup>a</sup>   | E <sup>b</sup> | Local Residues <sup>c</sup>                                                                                                                    |
|--------------------|----------------|------------------------------------------------------------------------------------------------------------------------------------------------|
|                    | -12.4          | W126[3.41], I133[3.48], Y136[3.51], F159[4.48], M163[4.52], Y206[5.41], V210[5.45], I214[5.49], V218[5.53], F221[5.56]                         |
|                    | -12.3          | Y74[2.41], L77[2.44], N78[2.45], V81[2.48], F85[2.52], F116[3.31], V157[4.46], W161[4.50]                                                      |
|                    | -12.2          | F56[1.51], L59[1.54], Y60[1.55], V63[1.58], Q64[1.59], L84[2.51], F85[2.52], F88[2.55]                                                         |
| Opsin, Bovine 5wkt |                |                                                                                                                                                |
| 5wkt_EC            | -14.2          | F88[2.55], G89[2.56], T93[2.60], F103, F105, G109[3.24], L112[3.27], E113[3.28], F116[3.31]                                                    |
|                    | -13.2          | I259[6.42], L262[6.45], I263[6.46], L266[6.49], P267[6.50], G270[6.53], V271[6.54], Y274[6.57], F283, F287[7.34]                               |
|                    | -13.0          | Q36[1.31], F37[1.32], M39[1.34], L40[1.35], Y43[1.38], M183, I286[7.33], F293[7.40]                                                            |
|                    | -12.5          | F159[4.48], V162[4.51], M163[4.52], A166[4.55], A169[4.58], P170[4.59], V173[4.62], W175                                                       |
| 5wkt_IC            | -13.7          | F208[5.43], F212[5.47], I213[5.48], L216[5.51], I217[5.52], F220[5.55], F221[5.56], Q225[5.60]                                                 |
|                    | -12.3          | W126[3.41], I133[3.48], Y136[3.51], V137[3.52], F159[4.48], M163[4.52], Y206[5.41], V210[5.45], I214[5.49], V218[5.53], F221[5.56], C222[5.57] |
| Opsin, Bovine 6fk6 |                |                                                                                                                                                |
| 6fk6_EC            | -14.6          | F85[2.52], G89[2.56], T93[2.60], F103, F105, G109[3.24], L112[3.27], E113[3.28], F116[3.31]                                                    |
|                    | -12.9          | W35[1.30], Q36[1.31], M39[1.34], L40[1.35], A42[1.37], Y43[1.38], L46[1.41], M183, I286[7.33], F293[7.40]                                      |
|                    | -12.8          | F208[5.43], L216[5.51], L262[6.45], W265[6.48], L266[6.49], A269[6.52], A272[6.55], F273[6.56], F276[6.59]                                     |
|                    | -12.6          | F159[4.48], M163[4.52], A166[4.55], P170[4.59], V173[4.62], W175, Y206[5.41], V210[5.45]                                                       |
|                    | -12.2          | A158[4.47], V162[4.51], L165[4.54], A166[4.55], A169[4.58], P170[4.59], V173[4.62], W175                                                       |
|                    | -12.1          | F85[2.52], F115[3.30], F116[3.31], L119[3.34], W161[4.50], L165[4.54], A169[4.58], L172[4.61], V173[4.62]                                      |
| 6fk6_IC            | -13.7          | I213[5.48], L216[5.51], I217[5.52], F220[5.55], F221[5.56], G224[5.59], Q225[5.60], W265[6.48]                                                 |
|                    | -13.7          | L59[1.54], T62[1.57], V63[1.58], L77[2.44], V81[2.48], F85[2.52], F116[3.31], L119[3.34], W161[4.50]                                           |
|                    | -12.9          | I133[3.48], Y136[3.51], M163[4.52], Y206[5.41], V210[5.45], I214[5.49], V218[5.53], F221[5.56]                                                 |
| Opsin, Bovine 6fk7 |                |                                                                                                                                                |
| 6fk7_EC            | -14.3          | V81[2.48], L84[2.51], F85[2.52], F88[2.55], G89[2.56], T93[2.60], F105, G109[3.24], L112[3.27], E113[3.28], F116[3.31]                         |
|                    | -13.6          | I263[6.46], L266[6.49], P267[6.50], G270[6.53], V271[6.54], Y274[6.57], I286[7.33], F287[7.34], I290[7.37]                                     |
|                    | -13.6          | W35[1.30], Q36[1.31], M39[1.34], Y43[1.38], L46[1.41], L50[1.45], F293[7.40], F294[7.41], T297[7.44]                                           |
|                    | -12.9          | F159[4.48], V162[4.51], M163[4.52], A166[4.55], A169[4.58], P170[4.59], V173[4.62], G174, W175                                                 |
|                    | -12.3          | F85[2.52], F115[3.30], F116[3.31], L119[3.34], W161[4.50], L165[4.54], A169[4.58], L172[4.61], V173[4.62]                                      |
| 6fk7_IC            | -14.0          | L59[1.54], Y60[1.55], T62[1.57], V63[1.58], L77[2.44], V81[2.48], F85[2.52], F116[3.31], L119[3.34], W161[4.50]                                |
| Opsin, Bovine 6fk8 |                |                                                                                                                                                |
| 6fk8_EC            | -14.5          | V81[2.48], L84[2.51], F85[2.52], F88[2.55], G89[2.56], T93[2.60], F105, G109[3.24], L112[3.27], E113[3.28], F116[3.31]                         |
|                    | -13.3          | I263[6.46], P267[6.50], G270[6.53], V271[6.54], Y274[6.57], F287[7.34], I290[7.37], P291[7.38]                                                 |
|                    | -13.0          | W35[1.30], Q36[1.31], M39[1.34], L40[1.35], Y43[1.38], L46[1.41], M183, I286[7.33], F293[7.40]                                                 |
|                    | -12.9          | F159[4.48], V162[4.51], M163[4.52], A166[4.55], A169[4.58], P170[4.59], V173[4.62], G174, W175                                                 |
|                    | -12.3          | V81[2.48], F85[2.52], F115[3.30], F116[3.31], L119[3.34], W161[4.50], L165[4.54], A169[4.58], L172[4.61], V173[4.62]                           |
| 6fk8_IC            | -14.0          | L216[5.51], I217[5.52], F220[5.55], F221[5.56], G224[5.59], Q225[5.60], W265[6.48], L266[6.49]                                                 |
|                    | -13.8          | L59[1.54], T62[1.57], V63[1.58], R69, L77[2.44], V81[2.48], F85[2.52], F116[3.31], L119[3.34], W161[4.50]                                      |
|                    | -12.7          | I133[3.48], Y136[3.51], F159[4.48], M163[4.52], Y206[5.41], V210[5.45], I214[5.49], V218[5.53], F221[5.56], C222[5.57]                         |
| Opsin, Bovine 6fk9 |                |                                                                                                                                                |
| 6fk9_EC            | -14.4          | F88[2.55], G89[2.56], T92[2.59], T93[2.60], F103, F105, G109[3.24], C110[3.25], L112[3.27], E113[3.28]                                         |
|                    | -13.7          | W35[1.30], Q36[1.31], M39[1.34], Y43[1.38], L46[1.41], L50[1.45], F293[7.40], F294[7.41], T297[7.44]                                           |
|                    | -13.6          | V162[4.51], M163[4.52], A166[4.55], A169[4.58], P170[4.59], V173[4.62], G174, W175                                                             |
|                    | -12.4          | F159[4.48], M163[4.52], W175, S202[5.37], I205[5.40], Y206[5.41], V209[5.44], V210[5.45]                                                       |
|                    | -12.2          | L262[6.45], I263[6.46], L266[6.49], P267[6.50], V271[6.54], I286[7.33], F287[7.34], I290[7.37]                                                 |



| PDB <sup>a</sup>                             | E <sup>b</sup> | Local Residues <sup>c</sup>                                                                                                  |
|----------------------------------------------|----------------|------------------------------------------------------------------------------------------------------------------------------|
| 6fk9_IC                                      | -12.2          | F85[2.52], F115[3.30], F116[3.31], L119[3.34], W161[4.50], L165[4.54], A169[4.58], L172[4.61], V173[4.62]                    |
|                                              | -13.7          | L216[5.51], I217[5.52], F220[5.55], F221[5.56], G224[5.59], Q225[5.60], W265[6.48], L266[6.49]                               |
|                                              | -13.7          | L59[1.54], T62[1.57], V63[1.58], L77[2.44], V81[2.48], F85[2.52], F116[3.31], L119[3.34], W161[4.50]                         |
|                                              | -12.9          | I133[3.48], Y136[3.51], F159[4.48], M163[4.52], Y206[5.41], V210[5.45], I214[5.49], V218[5.53], F221[5.56], C222[5.57]       |
| Opsin, Bovine 6fka                           |                |                                                                                                                              |
| 6fka_EC                                      | -14.5          | V81[2.48], L84[2.51], F85[2.52], F88[2.55], G89[2.56], T93[2.60], F103, F105, G109[3.24], L112[3.27], E113[3.28], F116[3.31] |
|                                              | -13.3          | W35[1.30], Q36[1.31], M39[1.34], Y43[1.38], L46[1.41], L50[1.45], F293[7.40], F294[7.41], T297[7.44]                         |
|                                              | -12.6          | A158[4.47], V162[4.51], L165[4.54], A166[4.55], A169[4.58], P170[4.59], V173[4.62], W175                                     |
|                                              | -12.5          | F159[4.48], V162[4.51], M163[4.52], A166[4.55], A169[4.58], P170[4.59], V173[4.62], W175                                     |
| 6fka_IC                                      | -12.5          | V81[2.48], F85[2.52], F115[3.30], F116[3.31], L119[3.34], W161[4.50], L165[4.54], A169[4.58], L172[4.61], V173[4.62]         |
|                                              | -14.2          | L59[1.54], T62[1.57], V63[1.58], L77[2.44], V81[2.48], F85[2.52], F116[3.31], L119[3.34], W161[4.50]                         |
|                                              | -13.9          | L216[5.51], I217[5.52], F220[5.55], F221[5.56], G224[5.59], Q225[5.60], W265[6.48], L266[6.49]                               |
| Opsin, Bovine 6fkb                           |                |                                                                                                                              |
| 6fkb_EC                                      | -14.5          | V81[2.48], L84[2.51], F85[2.52], F88[2.55], G89[2.56], T93[2.60], F105, G109[3.24], L112[3.27], E113[3.28], F116[3.31]       |
|                                              | -13.6          | W35[1.30], Q36[1.31], M39[1.34], Y43[1.38], L46[1.41], L50[1.45], F293[7.40], F294[7.41], T297[7.44]                         |
|                                              | -12.8          | F159[4.48], V162[4.51], M163[4.52], L165[4.54], A166[4.55], A169[4.58], P170[4.59], V173[4.62], G174, W175                   |
|                                              | -12.3          | A158[4.47], W161[4.50], V162[4.51], L165[4.54], A166[4.55], A169[4.58], P170[4.59], V173[4.62], W175                         |
|                                              | -12.6          | F85[2.52], F115[3.30], L119[3.34], W161[4.50], L165[4.54], A169[4.58], L172[4.61], V173[4.62]                                |
| 6fkb_IC                                      | -13.1          | I133[3.48], Y136[3.51], P142, M163[4.52], V210[5.45], I214[5.49], V218[5.53], F221[5.56], C222[5.57]                         |
| Opsin, Bovine 6fkc                           |                |                                                                                                                              |
| 6fkc_EC                                      | -15.1          | I263[6.46], P267[6.50], G270[6.53], V271[6.54], Y274[6.57], F283, F287[7.34], M288[7.35], I290[7.37], P291[7.38]             |
|                                              | -14.3          | F88[2.55], G89[2.56], T92[2.59], T93[2.60], F103, F105, G109[3.24], L112[3.27], E113[3.28]                                   |
|                                              | -13.8          | W35[1.30], Q36[1.31], M39[1.34], Y43[1.38], L46[1.41], F293[7.40], F294[7.41], T297[7.44]                                    |
|                                              | -12.7          | A158[4.47], W161[4.50], V162[4.51], L165[4.54], A166[4.55], A169[4.58], P170[4.59], V173[4.62], W175                         |
| 6fkc_IC                                      | -14.0          | L59[1.54], T62[1.57], V63[1.58], L77[2.44], V81[2.48], F85[2.52], F116[3.31], L119[3.34], W161[4.50]                         |
| Opsin, Bovine 6fkd                           |                |                                                                                                                              |
| 6fkd_EC                                      | -14.6          | V81[2.48], L84[2.51], F85[2.52], F88[2.55], G89[2.56], T93[2.60], F105, G109[3.24], L112[3.27], E113[3.28], F116[3.31]       |
|                                              | -13.0          | Q36[1.31], M39[1.34], L40[1.35], Y43[1.38], L46[1.41], M183, I286[7.33], F293[7.40]                                          |
|                                              | -13.0          | I259[6.42], L262[6.45], I263[6.46], L266[6.49], P267[6.50], G270[6.53], V271[6.54], I286[7.33], F287[7.34], I290[7.37]       |
|                                              | -13.0          | V162[4.51], M163[4.52], A166[4.55], A169[4.58], P170[4.59], V173[4.62], G174, W175                                           |
| 6fkd_IC                                      | -14.1          | F208[5.43], I213[5.48], L216[5.51], I217[5.52], F220[5.55], F221[5.56], Q225[5.60], W265[6.48]                               |
|                                              | -13.3          | I133[3.48], Y136[3.51], F159[4.48], M163[4.52], Y206[5.41], V210[5.45], I214[5.49], V218[5.53], F221[5.56], C222[5.57]       |
|                                              | -13.7          | L59[1.54], T62[1.57], V63[1.58], R69, L77[2.44], V81[2.48], F85[2.52], W161[4.50]                                            |
| Orexin receptor                              |                |                                                                                                                              |
| Orexin receptor Type 1, inactive, Human 4zjc |                |                                                                                                                              |
| 4zjc_EC                                      | -17.0          | K43, V48[1.34], L49[1.35], A52[1.38], A338[7.33], T341[7.36], F342[7.37], W345[7.40]                                         |
|                                              | -13.1          | I175[4.56], P178[4.59], W206, Y211[5.34], I214[5.37], Y215[5.38], C218[5.41], V222[5.45]                                     |
|                                              | -12.7          | F220[5.43], Y224[5.47], L225[5.48], L228[5.51], A308[6.45], L312[6.49], V316[6.53], I319[6.56], L320[6.57], F324[6.61]       |
|                                              | -12.4          | A117[3.23], K120[3.26], V121[3.27], Y124[3.30], A170[4.51], L173[4.54], A174[4.55], V177[4.58], A180[4.61]                   |
|                                              | -12.1          | L309[6.46], L312[6.49], P313[6.50], V316[6.53], L317[6.54], C339[7.34], F342[7.37], L346[7.41]                               |
| 4zjc_IC                                      | -14.0          | A51[1.37], V54[1.40], A55[1.41], V58[1.44], V59[1.45], I356[7.51], N359[7.54], F360[7.55]                                    |

| PDB <sup>a</sup>                                      | E <sup>b</sup> | Local Residues <sup>c</sup>                                                                                                       |
|-------------------------------------------------------|----------------|-----------------------------------------------------------------------------------------------------------------------------------|
|                                                       | -12.8          | N87[2.45], L90[2.48], L94[2.52], L125[3.31], R162[4.43], I165[4.46], L166[4.47], W169[4.50]                                       |
|                                                       | -12.6          | K298[6.35], V302[6.39], V306[6.43], L309[6.46], F342[7.37], L346[7.41], I356[7.51], I357[7.52], F360[7.55], L361[7.56]            |
|                                                       | -13.1          | F57[1.43], L61[1.47], V62[1.48], T65[1.51], L66[1.52], L69[1.55], A97[2.55], A372[8.57], F373[8.58]                               |
| Orexin receptor Type 2, inactive, Human 4s0v          |                |                                                                                                                                   |
| 4s0v_EC                                               | -14.0          | Y53[1.31], V56[1.34], L57[1.35], G60[1.38], I63[1.41], A344[7.33], F348[7.37], W351[7.40]                                         |
|                                                       | -13.3          | S125[3.23], K128[3.26], V129[3.27], Y132[3.30], I178[4.51], C181[4.54], I182[4.55], I185[4.58], A188[4.61]                        |
|                                                       | -12.8          | V179[4.52], I183[4.56], P186[4.59], W214, Y219[5.34], Y223[5.38], C226[5.41], V230[5.45]                                          |
|                                                       | -12.4          | I315[6.46], L318[6.49], P319[6.50], I322[6.53], L323[6.54], L326[6.57], F333, W345[7.34]                                          |
| 4s0v_IC                                               | -13.7          | L98[2.48], Y132[3.30], L133[3.31], R170[4.43], I173[4.46], V174[4.47], W177[4.50], C181[4.54]                                     |
|                                                       | -13.1          | F228[5.43], M233[5.48], L236[5.51], V240[5.55], M307[6.38], L310[6.41], L311[6.42], A314[6.45], I322[6.53]                        |
| Orexin receptor Type 2, inactive, Human 5wqc          |                |                                                                                                                                   |
| 5wqc_EC                                               | -13.9          | Y53[1.31], V56[1.34], L57[1.35], G60[1.38], I63[1.41], A344[7.33], F348[7.37], W351[7.40]                                         |
|                                                       | -13.4          | S125[3.23], K128[3.26], V129[3.27], Y132[3.30], I178[4.51], C181[4.54], I182[4.55], I185[4.58]                                    |
|                                                       | -13.3          | V179[4.52], I183[4.56], P186[4.59], W214, Y219[5.34], P220[5.35], M222[5.37], Y223[5.38], C226[5.41]                              |
|                                                       | -12.6          | Y53[1.31], V56[1.34], L57[1.35], Y343[7.32], A344[7.33], W345[7.34], T347[7.36], F348[7.37], W351[7.40]                           |
| 5wqc_IC                                               | -13.7          | I62[1.40], I63[1.41], V66[1.44], V67[1.45], I362[7.51], N365[7.54], F375[8.54], F379[8.58]                                        |
|                                                       | -12.9          | L143[3.41], C147[3.45], L150[3.48], S172[4.45], I175[4.48], V179[4.52], I183[4.56], V230[5.45]                                    |
|                                                       | -12.9          | M233[5.48], L236[5.51], V240[5.55], Y243[5.58], M307[6.38], L310[6.41], L311[6.42], A314[6.45], I322[6.53]                        |
|                                                       | -12.9          | F65[1.43], L69[1.47], I70[1.48], V73[1.51], L74[1.52], A378[8.57], F379[8.58], C382                                               |
|                                                       | -13.5          | L98[2.48], Y132[3.30], L133[3.31], R170[4.43], I173[4.46], V174[4.47], W177[4.50], C181[4.54]                                     |
|                                                       | -12.8          | G60[1.38], I63[1.41], V64[1.42], V312[6.43], W351[7.40], A359[7.48], I362[7.51], I363[7.52], F366[7.55], L367[7.56]               |
| Orexin receptor Type 2, inactive, Human 5ws3          |                |                                                                                                                                   |
| 5ws3_EC                                               | -13.7          | Y53[1.31], V56[1.34], L57[1.35], G60[1.38], I63[1.41], A344[7.33], F348[7.37], W351[7.40]                                         |
|                                                       | -13.5          | Q124[3.22], S125[3.23], K128[3.26], V129[3.27], Y132[3.30], I178[4.51], C181[4.54], I182[4.55], I185[4.58], A188[4.61]            |
|                                                       | -12.6          | L143[3.41], V179[4.52], I183[4.56], P186[4.59], W214, Y219[5.34], Y223[5.38], C226[5.41], V230[5.45]                              |
| 5ws3_IC                                               | -14.8          | Y132[3.30], R170[4.43], V174[4.47], W177[4.50], I178[4.51], C181[4.54], I182[4.55], I185[4.58]                                    |
|                                                       | -14.4          | L236[5.51], M239[5.54], V240[5.55], Y243[5.58], L244[5.59], L310[6.41], L311[6.42], A314[6.45], I315[6.46], L318[6.49]            |
|                                                       | -13.6          | L69[1.47], I70[1.48], V73[1.51], L74[1.52], A378[8.57], F379[8.58], C381, C382                                                    |
|                                                       | -15.0          | I62[1.40], V66[1.44], V67[1.45], I70[1.48], I362[7.51], N365[7.54], F375[8.54], F379[8.58]                                        |
|                                                       | -12.7          | L143[3.41], C147[3.45], L150[3.48], I175[4.48], V179[4.52], I183[4.56], C226[5.41], V230[5.45]                                    |
|                                                       | -12.5          | G60[1.38], I63[1.41], V64[1.42], V308[6.39], V312[6.43], W351[7.40], A359[7.48], I362[7.51], I363[7.52], F366[7.55], L367[7.56]   |
|                                                       | -13.3          | N95[2.45], L98[2.48], L102[2.52], T106[2.56], V129[3.27], L133[3.31], I173[4.46], W177[4.50]                                      |
| P2Y receptor                                          |                |                                                                                                                                   |
| P2Y1 receptor, inactive, with cholesterol, Human 4xnv |                |                                                                                                                                   |
| 4xnv_EC                                               | -12.9          | I178[4.52], V181[4.55], A182[4.56], P185[4.59], Y189[4.63], Y217[5.38], C220[5.41], A224[5.45]                                    |
|                                                       | -12.7          | I59[1.40], F62[1.43], I63[1.44], L67[1.48], P105[2.58], I108[2.61], F109[2.62], F112[2.65]                                        |
|                                                       | -12.2          | F215[5.36], M219[5.40], F226[5.47], C227[5.48], L230[5.51], L234[5.55], I274[6.49], V278[6.53], T281[6.56], R285[6.60]            |
|                                                       | -12.5          | G48, F49[1.30], Y52[1.33], Y53[1.34], A56[1.37], V57[1.38], L60[1.41], L315[7.44], V319[7.48]                                     |
|                                                       | -12.1          | A270[6.45], I274[6.49], P275[6.50], V278[6.53], M279[6.54], M282[6.57], V302[7.31], T305[7.34]                                    |
| 4xnv_IC                                               | -13.5          | W83, V88[2.41], F91[2.44], N92[2.45], L95[2.48], I169[4.43], S172[4.46], V173[4.47], W176[4.50], V180[4.54]                       |
|                                                       | -13.0          | Y89[2.42], L140[3.41], C144[3.45], A147[3.48], H148[3.49], I171[4.45], V175[4.49], I178[4.52], A224[5.45], M225[5.46], L232[5.53] |

| PDB <sup>a</sup>                                       | E <sup>b</sup> | Local Residues <sup>c</sup>                                                                                                        |
|--------------------------------------------------------|----------------|------------------------------------------------------------------------------------------------------------------------------------|
| P2Y1 receptor, inactive, Human 4xnw                    |                |                                                                                                                                    |
| 4xnw_EC                                                | -14.4          | I178[4.52], V181[4.55], A182[4.56], P185[4.59], Y189[4.63], S213[5.34], I216[5.37], Y217[5.38], C220[5.41]                         |
|                                                        | -13.6          | F215[5.36], M219[5.40], T222[5.43], F226[5.47], C227[5.48], L230[5.51], L234[5.55], I274[6.49], V278[6.53], T281[6.56], R285[6.60] |
|                                                        | -13.1          | F215[5.36], M219[5.40], V223[5.44], C227[5.48], V228[5.49], V231[5.52], T281[6.56], R285[6.60]                                     |
|                                                        | -12.2          | F49[1.30], Y53[1.34], V57[1.38], V271[6.46], V308[7.37], L312[7.41], L315[7.44], V319[7.48]                                        |
|                                                        | -11.8          | I59[1.40], F62[1.43], I63[1.44], L67[1.48], P105[2.58], I108[2.61], F109[2.62], F119                                               |
|                                                        | -12.2          | T267[6.42], A270[6.45], V271[6.46], P275[6.50], A304[7.33], T305[7.34], V308[7.37], T309[7.38], L312[7.41]                         |
| 4xnw_IC                                                | -13.7          | W83, V88[2.41], F91[2.44], N92[2.45], L95[2.48], F129[3.30], K165[4.39], I169[4.43], V173[4.47], W176[4.50], V180[4.54]            |
|                                                        | -13.0          | V61[1.42], Y260[6.35], I264[6.39], L315[7.44], C318[7.47], V319[7.48], I322[7.51], L326[7.55]                                      |
|                                                        | -12.9          | Y89[2.42], L140[3.41], C144[3.45], A147[3.48], R162, I171[4.45], I178[4.52], A182[4.56], A224[5.45], M225[5.46]                    |
| P2Y12 receptor, inactive, with cholesterol, Human 4ntj |                |                                                                                                                                    |
| 4ntj_EC                                                | -14.6          | Y192[5.41], Q195[5.44], V196[5.45], W199[5.48], L203[5.52], R256[6.55], T260[6.59], L261[6.60]                                     |
|                                                        | -14.5          | F36[1.43], L40[1.47], L75[2.55], P78[2.58], F79[2.59], L82[2.62], R93[3.21], V96[3.24]                                             |
|                                                        | -13.8          | F246[6.45], I247[6.46], V250[6.49], P251[6.50], F254[6.53], A255[6.54], P258[6.57], Y259[6.58], V279[7.34]                         |
|                                                        | -13.0          | I247[6.46], T275[7.30], Y278[7.33], V279[7.34], S282[7.37], T283[7.38], W285[7.40], L286[7.41], L289[7.44]                         |
|                                                        | -12.8          | Q25[1.32], V26[1.33], P29[1.36], L30[1.37], T33[1.40], F37[1.44], I81[2.61], A85[2.65], L87                                        |
| 4ntj_IC                                                | -14.4          | N235[6.34], V236[6.35], F239[6.38], I242[6.41], A243[6.42], F246[6.45], I247[6.46], V250[6.49], P251[6.50]                         |
|                                                        | -13.8          | I61[2.41], N65[2.45], I68[2.48], L72[2.52], F106[3.34], K142[4.43], V146[4.47], W149[4.50], F153[4.54], M160[4.61]                 |
|                                                        | -12.9          | I120[3.48], Y123[3.51], Q124[3.52], I200[5.49], L203[5.52], I204[5.53], V207[5.56], C208[5.57]                                     |
|                                                        | -13.0          | L117[3.45], I120[3.48], Q124[3.52], L144[4.45], F151[4.52], I193[5.42], V196[5.45], I197[5.46], I200[5.49]                         |
| P2Y12 receptor, inactive, with cholesterol, Human 4pxz |                |                                                                                                                                    |
| 4pxz_EC                                                | -12.5          | I23[1.30], I247[6.46], P251[6.50], Y278[7.33], V279[7.34], S282[7.37], T283[7.38], L286[7.41]                                      |
|                                                        | -12.4          | F95[3.23], Q98[3.26], V99[3.27], I103[3.31], L157[4.58], M160[4.61], I161[4.62], N164                                              |
|                                                        | -12.3          | F246[6.45], V250[6.49], P251[6.50], F254[6.53], A255[6.54], P258[6.57], T275[7.30], L276[7.31], V279[7.34]                         |
| 4pxz_IC                                                | -13.9          | I61[2.41], N65[2.45], I68[2.48], L72[2.52], I103[3.31], F106[3.34], K142[4.43], V146[4.47], W149[4.50], F153[4.54], M160[4.61]     |
|                                                        | -12.1          | L31[1.38], V34[1.41], I240[6.39], W285[7.40], L289[7.44], L293[7.48], F296[7.51], F300[7.55]                                       |
|                                                        | -11.9          | L117[3.45], I120[3.48], L144[4.45], Y192[5.41], I193[5.42], V196[5.45], I197[5.46], I200[5.49], I204[5.53]                         |
| P2Y12 receptor, inactive, Human 4py0                   |                |                                                                                                                                    |
| 4py0_EC                                                | -12.2          | V250[6.49], P251[6.50], F254[6.53], A255[6.54], P258[6.57], F268, T275[7.30], L276[7.31], V279[7.34]                               |
|                                                        | -12.0          | F246[6.45], I247[6.46], P251[6.50], T275[7.30], Y278[7.33], V279[7.34], S282[7.37], L286[7.41]                                     |
| 4py0_IC                                                | -13.5          | I68[2.48], L72[2.52], I103[3.31], F106[3.34], K142[4.43], V146[4.47], W149[4.50], F153[4.54], M160[4.61]                           |
|                                                        | -12.5          | W199[5.48], F202[5.51], I206[5.55], Y209[5.58], T210[5.59], I242[6.41], F246[6.45], F254[6.53]                                     |
|                                                        | -12.4          | L117[3.45], I120[3.48], L144[4.45], V147[4.48], F151[4.52], Y192[5.41], I193[5.42], V196[5.45], I197[5.46], I200[5.49], I204[5.53] |
|                                                        | -11.9          | L31[1.38], I240[6.39], I247[6.46], W285[7.40], L289[7.44], L293[7.48], F296[7.51], F300[7.55]                                      |
| Rhodospin active state                                 |                |                                                                                                                                    |
| Rhodopsin activate state, Bovine 2x72                  |                |                                                                                                                                    |
| 2x72_EC                                                | -14.5          | F88[2.55], G89[2.56], T93[2.60], F103, F105, G109[3.24], L112[3.27], Q113[3.28]                                                    |
|                                                        | -13.4          | Q36[1.31], M39[1.34], L40[1.35], Y43[1.38], L46[1.41], M183, I286[7.33], T289[7.36], F293[7.40]                                    |
|                                                        | -12.8          | I259[6.42], L262[6.45], I263[6.46], L266[6.49], P267[6.50], G270[6.53], V271[6.54], Y274[6.57], F287[7.34]                         |
|                                                        | -13.0          | F159[4.48], V162[4.51], M163[4.52], L165[4.54], A166[4.55], A169[4.58], P170[4.59], V173[4.62], W175                               |

| PDB <sup>a</sup>                                    | E <sup>b</sup>                                                                                 | Local Residues <sup>c</sup>                                                                                            |
|-----------------------------------------------------|------------------------------------------------------------------------------------------------|------------------------------------------------------------------------------------------------------------------------|
| 2x72_IC                                             | -14.2                                                                                          | L59[1.54], T62[1.57], V63[1.58], L77[2.44], V81[2.48], F85[2.52], L119[3.34], W161[4.50]                               |
|                                                     | -13.3                                                                                          | I213[5.48], L216[5.51], I217[5.52], F220[5.55], F221[5.56], G224[5.59], Q225[5.60], L266[6.49]                         |
|                                                     | -12.7                                                                                          | I133[3.48], Y136[3.51], F159[4.48], M163[4.52], V210[5.45], I214[5.49], V218[5.53], F221[5.56], C222[5.57]             |
|                                                     | -13.0                                                                                          | F56[1.51], L59[1.54], Y60[1.55], V63[1.58], Q64[1.59], L84[2.51], F85[2.52], F88[2.55]                                 |
| Rhodopsin activate state, MII, Bovine 3pqr          |                                                                                                |                                                                                                                        |
| 3pqr_EC                                             | -14.4                                                                                          | V81[2.48], F85[2.52], F88[2.55], G89[2.56], T93[2.60], F105, G109[3.24], L112[3.27], E113[3.28], F116[3.31]            |
|                                                     | -13.0                                                                                          | Q36[1.31], F37[1.32], M39[1.34], L40[1.35], Y43[1.38], M183, I286[7.33], F293[7.40]                                    |
|                                                     | -12.4                                                                                          | I259[6.42], L262[6.45], I263[6.46], L266[6.49], P267[6.50], V271[6.54], F283, F287[7.34]                               |
|                                                     | -12.4                                                                                          | A158[4.47], W161[4.50], V162[4.51], L165[4.54], A166[4.55], A169[4.58], P170[4.59], V173[4.62], W175                   |
|                                                     | -12.3                                                                                          | F159[4.48], M163[4.52], A166[4.55], P170[4.59], V173[4.62], W175, Y206[5.41], V210[5.45]                               |
| 3pqr_IC                                             | -13.2                                                                                          | L216[5.51], F220[5.55], L262[6.45], L266[6.49], G270[6.53], F273[6.56], Y274[6.57], H278[6.61]                         |
|                                                     | -12.9                                                                                          | I133[3.48], Y136[3.51], F159[4.48], M163[4.52], Y206[5.41], V210[5.45], I214[5.49], V218[5.53], F221[5.56]             |
|                                                     | -12.8                                                                                          | L59[1.54], T62[1.57], V63[1.58], L77[2.44], V81[2.48], F85[2.52], F116[3.31], L119[3.34], W161[4.50]                   |
| -12.6                                               | F212[5.47], I213[5.48], L216[5.51], I217[5.52], F220[5.55], F221[5.56], G224[5.59], L266[6.49] |                                                                                                                        |
| Rhodopsin activate state, MII, Bovine 3pxo          |                                                                                                |                                                                                                                        |
| 3pxo_EC                                             | -14.4                                                                                          | F88[2.55], G89[2.56], T93[2.60], F103, F105, G109[3.24], L112[3.27], E113[3.28], F116[3.31]                            |
|                                                     | -13.6                                                                                          | Q36[1.31], F37[1.32], M39[1.34], L40[1.35], Y43[1.38], M183, I286[7.33], F293[7.40]                                    |
|                                                     | -13.1                                                                                          | F159[4.48], V162[4.51], M163[4.52], A166[4.55], A169[4.58], P170[4.59], V173[4.62], W175                               |
|                                                     | -12.9                                                                                          | L216[5.51], F220[5.55], L262[6.45], L266[6.49], G270[6.53], F273[6.56], Y274[6.57], H278[6.61]                         |
|                                                     | -12.7                                                                                          | I259[6.42], L262[6.45], I263[6.46], L266[6.49], P267[6.50], V271[6.54], F283, F287[7.34]                               |
| 3pxo_IC                                             | -13.4                                                                                          | I133[3.48], Y136[3.51], F159[4.48], M163[4.52], Y206[5.41], V210[5.45], I214[5.49], V218[5.53], F221[5.56], C222[5.57] |
| Rhodopsin activate state, MII, Bovine 4a4m          |                                                                                                |                                                                                                                        |
| 4a4m_EC                                             | -14.6                                                                                          | V81[2.48], F85[2.52], F88[2.55], G89[2.56], T93[2.60], F103, F105, G109[3.24], L112[3.27], E113[3.28], F116[3.31]      |
|                                                     | -13.3                                                                                          | W35[1.30], Q36[1.31], M39[1.34], L40[1.35], Y43[1.38], M183, I286[7.33], T289[7.36], F293[7.40]                        |
|                                                     | -13.2                                                                                          | W175, S202[5.37], F203[5.38], I205[5.40], Y206[5.41], V209[5.44], V210[5.45], I214[5.49]                               |
|                                                     | -13.0                                                                                          | I48[1.43], M49[1.44], F52[1.47], F88[2.55], T92[2.59], T93[2.60], Y96[2.63], F105                                      |
|                                                     | -12.9                                                                                          | I259[6.42], L262[6.45], I263[6.46], L266[6.49], P267[6.50], G270[6.53], V271[6.54], Y274[6.57], F283, F287[7.34]       |
|                                                     | -12.9                                                                                          | F159[4.48], M163[4.52], A166[4.55], P170[4.59], V173[4.62], W175, Y206[5.41], V210[5.45]                               |
| 4a4m_IC                                             | -13.5                                                                                          | F208[5.43], I213[5.48], L216[5.51], I217[5.52], F220[5.55], F221[5.56], G224[5.59], Q225[5.60]                         |
|                                                     | -13.3                                                                                          | L59[1.54], T62[1.57], V63[1.58], L77[2.44], V81[2.48], F85[2.52], F116[3.31], L119[3.34], W161[4.50]                   |
|                                                     | -12.2                                                                                          | I133[3.48], Y136[3.51], F159[4.48], M163[4.52], Y206[5.41], V210[5.45], I214[5.49], V218[5.53], F221[5.56]             |
| Rhodopsin activate state, Bovine4zww                |                                                                                                |                                                                                                                        |
| 4zww_EC                                             | -14.2                                                                                          | L88[2.55], G89[2.56], S93[2.60], F103, F105, G109[3.24], C110[3.25], L112[3.27], Q113[3.28], F116[3.31]                |
|                                                     | -13.8                                                                                          | F159[4.48], V162[4.51], M163[4.52], L165[4.54], A166[4.55], A169[4.58], P170[4.59], A173[4.62], W175                   |
|                                                     | -13.8                                                                                          | Q36[1.31], M39[1.34], L183, I286[7.33], T289[7.36], I290[7.37], F293[7.40], F294[7.41]                                 |
| 4zww_IC                                             | -14.0                                                                                          | F208[5.43], F212[5.47], T213[5.48], M216[5.51], I217[5.52], F220[5.55], F221[5.56], Q225[5.60]                         |
|                                                     | -12.7                                                                                          | F45[1.40], I48[1.43], V49[1.44], F52[1.47], P53[1.48], F56[1.51], L57[1.52], Y60[1.55], T320[8.57]                     |
| Rhodopsin activate state, with arrestin, Human 5dys |                                                                                                |                                                                                                                        |
| 5dys_EC                                             | -14.4                                                                                          | F88[2.55], G89[2.56], T93[2.60], F103, F105, G109[3.24], L112[3.27], E113[3.28]                                        |
|                                                     | -12.8                                                                                          | I259[6.42], L262[6.45], I263[6.46], L266[6.49], P267[6.50], G270[6.53], V271[6.54], Y274[6.57], F283, F287[7.34]       |
| 5dys_IC                                             |                                                                                                |                                                                                                                        |

| PDB <sup>a</sup>                                    | E <sup>b</sup> | Local Residues <sup>c</sup>                                                                                              |
|-----------------------------------------------------|----------------|--------------------------------------------------------------------------------------------------------------------------|
| Rhodopsin activate state, with arrestin, Human 5w0p |                |                                                                                                                          |
| 5w0p_EC                                             | -12.8          | I259[6.42], L262[6.45], I263[6.46], V266[6.49], P267[6.50], S270[6.53], V271[6.54], Y274[6.57], F287[7.34]               |
|                                                     | -12.7          | A158[4.47], V162[4.51], L165[4.54], A166[4.55], A169[4.58], P170[4.59], A173[4.62], W175                                 |
|                                                     | -12.5          | L88[2.55], G89[2.56], S93[2.60], F105, G109[3.24], L112[3.27], Q113[3.28], F116[3.31]                                    |
| 5w0p_IC                                             | -13.9          | F220[5.55], Y223[5.58], G224[5.59], V227[5.62], V254[6.37], I255[6.38], V258[6.41], L262[6.45]                           |
|                                                     | -13.1          | F45[1.40], I48[1.43], V49[1.44], F52[1.47], P53[1.48], F56[1.51], L57[1.52], Y60[1.55], T320[8.57]                       |
|                                                     | -15.3          | F208[5.43], T213[5.48], M216[5.51], I217[5.52], F220[5.55], F221[5.56], G224[5.59], Q225[5.60]                           |
| Rhodopsin inactive state                            |                |                                                                                                                          |
| Rhodopsin inactive state, Bovine 1f88               |                |                                                                                                                          |
| 1f88_EC                                             | -15.5          | Q36[1.31], M39[1.34], L40[1.35], Y43[1.38], M183, I286[7.33], T289[7.36], I290[7.37], F293[7.40], F294[7.41], T297[7.44] |
|                                                     | -13.4          | L216[5.51], F220[5.55], L262[6.45], L266[6.49], G270[6.53], F273[6.56], Y274[6.57], T277[6.60], H278[6.61]               |
|                                                     | -12.9          | L262[6.45], I263[6.46], L266[6.49], P267[6.50], G270[6.53], V271[6.54], Y274[6.57], F287[7.34]                           |
|                                                     | -12.7          | A158[4.47], W161[4.50], V162[4.51], L165[4.54], A166[4.55], A169[4.58], P170[4.59], V173[4.62]                           |
|                                                     | -13.5          | W175, E201[5.36], S202[5.37], F203[5.38], I205[5.40], Y206[5.41], V209[5.44], V210[5.45]                                 |
| 1f88_IC                                             | -13.7          | T62[1.57], V63[1.58], K66, R69, Y74[2.41], L77[2.44], V157[4.46], W161[4.50], L165[4.54]                                 |
|                                                     | -13.0          | Y43[1.38], I256[6.39], A260[6.43], F294[7.41], T297[7.44], Y301[7.48], V304[7.51], I305[7.52], M309[7.56]                |
|                                                     | -12.8          | F220[5.55], Y223[5.58], E232[5.67], I259[6.42], L262[6.45], I263[6.46], L266[6.49], P267[6.50]                           |
|                                                     | -13.0          | F212[5.47], I213[5.48], I217[5.52], F220[5.55], F221[5.56], G224[5.59], V227[5.62], L266[6.49]                           |
|                                                     | -13.0          | W126[3.41], V129[3.44], I133[3.48], Y136[3.51], F159[4.48], M163[4.52], V210[5.45], I214[5.49], V218[5.53], C222[5.57]   |
| Rhodopsin inactive state, Bovine 1gzm               |                |                                                                                                                          |
| 1gzm_EC                                             | -13.9          | W35[1.30], Q36[1.31], M39[1.34], L40[1.35], Y43[1.38], M183, I286[7.33], I290[7.37], F294[7.41], T297[7.44]              |
|                                                     | -12.5          | L262[6.45], I263[6.46], L266[6.49], P267[6.50], G270[6.53], V271[6.54], Y274[6.57], F287[7.34]                           |
|                                                     | -13.6          | F212[5.47], L216[5.51], L262[6.45], L266[6.49], G270[6.53], F273[6.56], Y274[6.57], H278[6.61]                           |
|                                                     | -12.9          | I263[6.46], P267[6.50], V271[6.54], I286[7.33], F287[7.34], I290[7.37], P291[7.38], F294[7.41]                           |
|                                                     | -13.2          | F85[2.52], T108[3.23], N111[3.26], L112[3.27], F115[3.30], F116[3.31], W161[4.50], L165[4.54]                            |
|                                                     | -12.5          | W126[3.41], F159[4.48], M163[4.52], A166[4.55], W175, Y206[5.41], V210[5.45], I214[5.49]                                 |
|                                                     | -12.2          | A158[4.47], V162[4.51], L165[4.54], A166[4.55], A169[4.58], P170[4.59], V173[4.62], W175                                 |
|                                                     | -11.9          | V81[2.48], L84[2.51], F85[2.52], F88[2.55], G89[2.56], T108[3.23], L112[3.27], F116[3.31]                                |
|                                                     | -13.2          | W175, S202[5.37], I205[5.40], Y206[5.41], V209[5.44], V210[5.45], I214[5.49], I217[5.52]                                 |
| 1gzm_IC                                             | -14.2          | R69, Y74[2.41], L77[2.44], N78[2.45], V81[2.48], F85[2.52], I154[4.43], V157[4.46], W161[4.50], L165[4.54]               |
|                                                     | -12.8          | I133[3.48], V137[3.52], F146, F148, H152[4.41], M155[4.44], G156[4.45], F159[4.48], V162[4.51]                           |
|                                                     | -13.0          | W126[3.41], V129[3.44], I133[3.48], Y136[3.51], F159[4.48], M163[4.52], V210[5.45], I214[5.49], V218[5.53], F221[5.56]   |
|                                                     | -12.2          | Y43[1.38], L47[1.42], I256[6.39], A260[6.43], T297[7.44], Y301[7.48], I305[7.52], M309[7.56]                             |
| Rhodopsin inactive state, Bovine 1hzx               |                |                                                                                                                          |
| 1hzx_EC                                             | -15.6          | Q36[1.31], M39[1.34], L40[1.35], Y43[1.38], M183, I286[7.33], T289[7.36], I290[7.37], F293[7.40], F294[7.41], T297[7.44] |
|                                                     | -15.1          | F159[4.48], V162[4.51], A166[4.55], A169[4.58], P170[4.59], V173[4.62], G174, W175, Y206[5.41]                           |
|                                                     | -13.8          | F212[5.47], L216[5.51], F220[5.55], L262[6.45], L266[6.49], G270[6.53], F273[6.56], Y274[6.57], T277[6.60], H278[6.61]   |
|                                                     | -13.6          | L262[6.45], I263[6.46], L266[6.49], P267[6.50], G270[6.53], V271[6.54], Y274[6.57], F287[7.34]                           |
|                                                     | -12.8          | F45[1.40], I48[1.43], M49[1.44], F52[1.47], P53[1.48], F88[2.55], T92[2.59], L95[2.62], Y96[2.63], F105                  |
|                                                     | -12.6          | F85[2.52], T108[3.23], N111[3.26], L112[3.27], F115[3.30], F116[3.31], W161[4.50], L165[4.54], L172[4.61]                |
| 1hzx_IC                                             | -13.4          | Y74[2.41], L77[2.44], V81[2.48], F85[2.52], F116[3.31], I154[4.43], V157[4.46], W161[4.50]                               |
|                                                     | -13.1          | Y43[1.38], I256[6.39], F294[7.41], T297[7.44], Y301[7.48], V304[7.51], I305[7.52], M308[7.55], M309[7.56]                |
|                                                     | -13.1          | F212[5.47], I213[5.48], I217[5.52], F220[5.55], F221[5.56], Y223[5.58], G224[5.59], V227[5.62]                           |
|                                                     | -12.6          | I133[3.48], F159[4.48], M163[4.52], Y206[5.41], V210[5.45], I214[5.49], V218[5.53], F221[5.56], C222[5.57]               |

| PDB <sup>a</sup>                                      | E <sup>b</sup> | Local Residues <sup>c</sup>                                                                                                         |
|-------------------------------------------------------|----------------|-------------------------------------------------------------------------------------------------------------------------------------|
| Rhodospin inactive state, Bovine 1l9h                 |                |                                                                                                                                     |
| 1l9h_EC                                               | -14.5          | W35[1.30], Q36[1.31], M39[1.34], Y43[1.38], M183, I290[7.37], F294[7.41], T297[7.44]                                                |
|                                                       | -12.6          | F85[2.52], T108[3.23], N111[3.26], L112[3.27], F115[3.30], F116[3.31], W161[4.50], L165[4.54], L172[4.61]                           |
|                                                       | -13.0          | V81[2.48], L84[2.51], F85[2.52], F88[2.55], G89[2.56], T92[2.59], F105, L112[3.27]                                                  |
|                                                       | -12.6          | L262[6.45], I263[6.46], L266[6.49], P267[6.50], G270[6.53], V271[6.54], Y274[6.57], F287[7.34]                                      |
|                                                       | -14.4          | F212[5.47], L216[5.51], F220[5.55], L262[6.45], L266[6.49], G270[6.53], F273[6.56], Y274[6.57], H278[6.61]                          |
|                                                       | -13.9          | I48[1.43], M49[1.44], F52[1.47], P53[1.48], F88[2.55], T92[2.59], L95[2.62], Y96[2.63], F105                                        |
| 1l9h_IC                                               | -13.4          | Y74[2.41], L77[2.44], V81[2.48], F85[2.52], F116[3.31], I154[4.43], V157[4.46], W161[4.50]                                          |
|                                                       | -13.0          | Y43[1.38], I256[6.39], I263[6.46], F294[7.41], T297[7.44], Y301[7.48], V304[7.51], I305[7.52], M308[7.55], M309[7.56]               |
|                                                       | -12.6          | W126[3.41], I133[3.48], F159[4.48], M163[4.52], Y206[5.41], V210[5.45], I214[5.49], V218[5.53], F221[5.56], C222[5.57]              |
| Rhodospin inactive state, Bovine 1u19                 |                |                                                                                                                                     |
| 1u19_EC                                               | -14.5          | A32, Q36[1.31], M39[1.34], L40[1.35], Y43[1.38], M183, I286[7.33], T289[7.36], I290[7.37], F293[7.40], F294[7.41], T297[7.44]       |
|                                                       | -12.9          | F45[1.40], I48[1.43], M49[1.44], F52[1.47], P53[1.48], F88[2.55], T92[2.59], L95[2.62], Y96[2.63], F105                             |
|                                                       | -12.8          | A158[4.47], V162[4.51], L165[4.54], A166[4.55], A169[4.58], P170[4.59], V173[4.62], W175                                            |
|                                                       | -13.0          | F56[1.51], F85[2.52], F88[2.55], G89[2.56], T92[2.59], T93[2.60], F105, L112[3.27]                                                  |
|                                                       | -12.6          | F85[2.52], L112[3.27], F115[3.30], F116[3.31], L119[3.34], W161[4.50], L165[4.54], L172[4.61]                                       |
|                                                       | -12.4          | F212[5.47], L216[5.51], F220[5.55], L262[6.45], L266[6.49], F273[6.56], Y274[6.57], H278[6.61]                                      |
|                                                       | -13.1          | L262[6.45], I263[6.46], L266[6.49], P267[6.50], G270[6.53], V271[6.54], Y274[6.57], F287[7.34]                                      |
| 1u19_IC                                               | -13.5          | Y74[2.41], L77[2.44], V81[2.48], I154[4.43], V157[4.46], A158[4.47], W161[4.50], L165[4.54]                                         |
|                                                       | -13.0          | Y43[1.38], I256[6.39], A260[6.43], I263[6.46], F294[7.41], T297[7.44], Y301[7.48], V304[7.51], I305[7.52], M309[7.56]               |
|                                                       | -13.1          | F212[5.47], I213[5.48], I217[5.52], F220[5.55], F221[5.56], Y223[5.58], G224[5.59], L266[6.49]                                      |
| Rhodospin inactive state, bathorhodopsin, Bovine 2g87 |                |                                                                                                                                     |
| 2g87_EC                                               | -14.3          | W35[1.30], Q36[1.31], M39[1.34], L40[1.35], Y43[1.38], M183, I286[7.33], T289[7.36], I290[7.37], F293[7.40], F294[7.41], T297[7.44] |
|                                                       | -13.1          | F212[5.47], L216[5.51], F220[5.55], L262[6.45], L266[6.49], G270[6.53], F273[6.56], Y274[6.57], T277[6.60], H278[6.61]              |
|                                                       | -12.7          | A158[4.47], W161[4.50], V162[4.51], L165[4.54], A166[4.55], A169[4.58], P170[4.59], V173[4.62]                                      |
|                                                       | -12.6          | V81[2.48], F85[2.52], T108[3.23], N111[3.26], L112[3.27], F115[3.30], F116[3.31], W161[4.50], L165[4.54], L172[4.61]                |
|                                                       | -12.5          | F45[1.40], I48[1.43], M49[1.44], F52[1.47], P53[1.48], F88[2.55], T92[2.59], L95[2.62], Y96[2.63], F105                             |
|                                                       | -12.4          | M163[4.52], A166[4.55], P170[4.59], V173[4.62], W175, Y206[5.41], V210[5.45], H211[5.46]                                            |
|                                                       | -13.5          | L262[6.45], I263[6.46], L266[6.49], P267[6.50], G270[6.53], V271[6.54], Y274[6.57], F287[7.34]                                      |
|                                                       | -12.8          | F56[1.51], L59[1.54], V81[2.48], L84[2.51], F85[2.52], F88[2.55], G89[2.56], L112[3.27]                                             |
| 2g87_IC                                               | -12.9          | Y74[2.41], L77[2.44], V81[2.48], F115[3.30], I154[4.43], V157[4.46], W161[4.50], L165[4.54]                                         |
|                                                       | -12.6          | Y43[1.38], I256[6.39], A260[6.43], I263[6.46], F294[7.41], T297[7.44], Y301[7.48], V304[7.51], I305[7.52], M309[7.56]               |
| Rhodospin inactive state, lumirhodopsin, Bovine 2hpy  |                |                                                                                                                                     |
| 2hpy_EC                                               | -14.1          | Q36[1.31], M39[1.34], L40[1.35], Y43[1.38], M183, I286[7.33], T289[7.36], I290[7.37], F293[7.40], F294[7.41]                        |
|                                                       | -13.5          | F159[4.48], V162[4.51], M163[4.52], A166[4.55], P170[4.59], V173[4.62], G174, W175                                                  |
|                                                       | -13.0          | L262[6.45], I263[6.46], L266[6.49], P267[6.50], G270[6.53], V271[6.54], Y274[6.57], F287[7.34]                                      |
|                                                       | -12.6          | I48[1.43], M49[1.44], F52[1.47], P53[1.48], F88[2.55], T92[2.59], L95[2.62], Y96[2.63], F105                                        |
|                                                       | -12.6          | V81[2.48], L84[2.51], F85[2.52], F88[2.55], G89[2.56], T93[2.60], F105, L112[3.27]                                                  |
|                                                       | -12.3          | V81[2.48], F85[2.52], F115[3.30], F116[3.31], W161[4.50], L165[4.54], A169[4.58], L172[4.61], V173[4.62]                            |
| 2hpy_IC                                               | -13.5          | Y74[2.41], L77[2.44], N78[2.45], V81[2.48], F85[2.52], I154[4.43], V157[4.46], W161[4.50]                                           |
|                                                       | -12.7          | Y43[1.38], I256[6.39], A260[6.43], I263[6.46], F294[7.41], T297[7.44], Y301[7.48], V304[7.51], I305[7.52], M308[7.55], M309[7.56]   |
|                                                       | -12.6          | F212[5.47], I213[5.48], L216[5.51], I217[5.52], F220[5.55], F221[5.56], G224[5.59], L266[6.49]                                      |

| PDB <sup>a</sup>                      | E <sup>b</sup> | Local Residues <sup>c</sup>                                                                                                         |
|---------------------------------------|----------------|-------------------------------------------------------------------------------------------------------------------------------------|
| Rhodospin inactive state, Bovine 2ped |                |                                                                                                                                     |
| 2ped_EC                               | -14.9          | W35[1.30], Q36[1.31], M39[1.34], L40[1.35], Y43[1.38], M183, I286[7.33], T289[7.36], I290[7.37], F293[7.40], F294[7.41], T297[7.44] |
|                                       | -14.0          | F212[5.47], L216[5.51], F220[5.55], L262[6.45], L266[6.49], G270[6.53], F273[6.56], Y274[6.57], T277[6.60], H278[6.61]              |
|                                       | -13.1          | I48[1.43], M49[1.44], F52[1.47], P53[1.48], F88[2.55], T92[2.59], L95[2.62], Y96[2.63], F105                                        |
|                                       | -14.1          | F159[4.48], V162[4.51], A166[4.55], A169[4.58], P170[4.59], V173[4.62], G174, W175                                                  |
|                                       | -13.6          | L262[6.45], I263[6.46], L266[6.49], P267[6.50], G270[6.53], V271[6.54], Y274[6.57], F287[7.34]                                      |
|                                       | -13.2          | I263[6.46], P267[6.50], V271[6.54], I286[7.33], F287[7.34], I290[7.37], P291[7.38], F294[7.41]                                      |
|                                       | -12.5          | F85[2.52], T108[3.23], N111[3.26], L112[3.27], F115[3.30], F116[3.31], W161[4.50], L165[4.54], L172[4.61]                           |
| 2ped_IC                               | -13.8          | F220[5.55], Y223[5.58], E232[5.67], R252[6.35], I255[6.38], I259[6.42], L262[6.45], L266[6.49]                                      |
|                                       | -13.2          | Y74[2.41], L77[2.44], V81[2.48], F85[2.52], I154[4.43], V157[4.46], A158[4.47], W161[4.50], L165[4.54]                              |
|                                       | -12.9          | F212[5.47], I213[5.48], I217[5.52], F220[5.55], F221[5.56], G224[5.59], Q225[5.60], L266[6.49]                                      |
|                                       | -12.6          | Y43[1.38], I256[6.39], F294[7.41], T297[7.44], Y301[7.48], V304[7.51], I305[7.52], M308[7.55], M309[7.56]                           |
| Rhodospin inactive state, Bovine 3c9l |                |                                                                                                                                     |
| 3c9l_EC                               | -14.2          | W35[1.30], Q36[1.31], M39[1.34], Y43[1.38], M183, I286[7.33], I290[7.37], T297[7.44]                                                |
|                                       | -13.0          | F85[2.52], T108[3.23], N111[3.26], L112[3.27], F115[3.30], F116[3.31], W161[4.50], L165[4.54]                                       |
|                                       | -12.7          | L262[6.45], I263[6.46], L266[6.49], P267[6.50], G270[6.53], V271[6.54], Y274[6.57], F287[7.34]                                      |
|                                       | -12.7          | F212[5.47], L216[5.51], L262[6.45], L266[6.49], G270[6.53], F273[6.56], Y274[6.57], H278[6.61]                                      |
|                                       | -12.5          | A158[4.47], W161[4.50], V162[4.51], L165[4.54], A166[4.55], A169[4.58], P170[4.59], V173[4.62]                                      |
| 3c9l_IC                               | -13.8          | Y74[2.41], L77[2.44], N78[2.45], V81[2.48], F85[2.52], I154[4.43], V157[4.46], W161[4.50], L165[4.54]                               |
|                                       | -12.8          | Y43[1.38], I256[6.39], A260[6.43], F294[7.41], T297[7.44], Y301[7.48], V304[7.51], I305[7.52], M308[7.55], M309[7.56]               |
|                                       | -12.9          | L59[1.54], V63[1.58], R69, L77[2.44], V81[2.48], L84[2.51], F85[2.52], F88[2.55]                                                    |
| Rhodospin inactive state, Bovine 3c9m |                |                                                                                                                                     |
| 3c9m_EC                               | -14.4          | Q36[1.31], M39[1.34], L40[1.35], Y43[1.38], M183, I286[7.33], I290[7.37], F294[7.41]                                                |
|                                       | -12.9          | L262[6.45], I263[6.46], L266[6.49], G270[6.53], F273[6.56], Y274[6.57], T277[6.60], H278[6.61]                                      |
| 3c9m_IC                               | -12.9          | Y43[1.38], I256[6.39], A260[6.43], F294[7.41], T297[7.44], Y301[7.48], V304[7.51], I305[7.52], M308[7.55], M309[7.56]               |
|                                       | -12.8          | Y74[2.41], L77[2.44], V81[2.48], F85[2.52], I154[4.43], V157[4.46], A158[4.47], W161[4.50], L165[4.54]                              |
|                                       | -12.6          | I133[3.48], Y136[3.51], F159[4.48], M163[4.52], V210[5.45], I214[5.49], V218[5.53], F221[5.56]                                      |
| Rhodospin inactive state, Bovine 3oax |                |                                                                                                                                     |
| 3oax_EC                               | -13.7          | W35[1.30], Q36[1.31], M39[1.34], L40[1.35], Y43[1.38], L46[1.41], M183, I286[7.33], I290[7.37]                                      |
|                                       | -13.1          | F159[4.48], V162[4.51], M163[4.52], A166[4.55], P170[4.59], V173[4.62], G174, W175, Y206[5.41]                                      |
|                                       | -13.0          | F45[1.40], I48[1.43], M49[1.44], F52[1.47], P53[1.48], F88[2.55], T92[2.59], L95[2.62], Y96[2.63], F105                             |
|                                       | -12.7          | I263[6.46], L266[6.49], P267[6.50], V271[6.54], I286[7.33], F287[7.34], I290[7.37], P291[7.38]                                      |
|                                       | -12.5          | F212[5.47], L216[5.51], F220[5.55], L262[6.45], L266[6.49], G270[6.53], F273[6.56], Y274[6.57], H278[6.61]                          |
|                                       | -12.5          | F85[2.52], T108[3.23], N111[3.26], L112[3.27], F115[3.30], F116[3.31], W161[4.50], L165[4.54], L172[4.61]                           |
|                                       | -12.9          | L59[1.54], V81[2.48], L84[2.51], F85[2.52], F88[2.55], G89[2.56], L112[3.27], F116[3.31]                                            |
| 3oax_IC                               | -13.4          | V63[1.58], Y74[2.41], L77[2.44], I154[4.43], V157[4.46], A158[4.47], W161[4.50], L165[4.54]                                         |
|                                       | -12.7          | Y43[1.38], I256[6.39], A260[6.43], I263[6.46], F294[7.41], T297[7.44], Y301[7.48], V304[7.51], I305[7.52], M308[7.55], M309[7.56]   |
| Rhodospin inactive state, Squid 2z73  |                |                                                                                                                                     |
| 2z73_EC                               | -14.3          | L272[6.46], P276[6.50], V280[6.54], W291, T293[7.31], Y295[7.33], A296[7.34], P300[7.38], F303[7.41]                                |
|                                       | -13.4          | F78[2.48], F81[2.51], T82[2.52], L85[2.55], V86[2.56], L91[2.61], F103, G104[3.21], A107[3.24], V110[3.27]                          |
|                                       | -13.2          | F210[5.48], I213[5.51], V279[6.53], L282[6.56], L283[6.57], F286[6.60], G287[6.61], P288                                            |

| PDB <sup>a</sup>                                              | E <sup>b</sup> | Local Residues <sup>c</sup>                                                                                                                    |
|---------------------------------------------------------------|----------------|------------------------------------------------------------------------------------------------------------------------------------------------|
|                                                               | -12.2          | F78[2.48], A106[3.23], K109[3.26], V110[3.27], F113[3.30], I114[3.31], W160[4.50], I171[4.61]                                                  |
| 2z73_IC                                                       | -13.3          | I213[5.51], I216[5.54], F217[5.55], Y220[5.58], F221[5.59], V224[5.62], I264[6.38], L271[6.45], S275[6.49], V279[6.53]                         |
|                                                               | -13.0          | G53[1.51], I56[1.54], Y57[1.55], T60[1.58], K61[1.59], F78[2.48], F81[2.51], L85[2.55]                                                         |
|                                                               | -13.5          | C49[1.47], G50[1.48], G53[1.51], I54[1.52], Y57[1.55], F81[2.51], L85[2.55], F89[2.59], P90[2.60], F330[8.58]                                  |
|                                                               | -12.7          | I131[3.48], N135[3.52], I206[5.44], L207[5.45], G211[5.49], L214[5.52], I215[5.53], F218[5.56], C219[5.57]                                     |
|                                                               | -12.5          | T60[1.58], M71[2.41], I74[2.44], F153[4.43], I156[4.46], I157[4.47], W160[4.50], L161[4.51], V164[4.54]                                        |
| Rhodospin inactive state, Squid 3ayn                          |                |                                                                                                                                                |
| 3ayn_EC                                                       | -14.1          | L272[6.46], P276[6.50], V279[6.53], V280[6.54], L283[6.57], W291, T293[7.31], A296[7.34], P300[7.38]                                           |
|                                                               | -14.0          | F210[5.48], I213[5.51], L271[6.45], V279[6.53], L282[6.56], L283[6.57], F286[6.60], G287[6.61], P288                                           |
|                                                               | -13.3          | L272[6.46], P276[6.50], T293[7.31], Y295[7.33], A296[7.34], L299[7.37], P300[7.38], F303[7.41]                                                 |
|                                                               | -12.6          | F78[2.48], F81[2.51], T82[2.52], L85[2.55], V86[2.56], P90[2.60], L91[2.61], F103, A107[3.24], V110[3.27]                                      |
| 3ayn_IC                                                       | -14.7          | I39[1.37], F40[1.38], I43[1.41], I47[1.45], W332, V333, L334, T335, C336                                                                       |
|                                                               | -14.0          | I39[1.37], I43[1.41], I46[1.44], I47[1.45], W332, V333, L334, T335, C336                                                                       |
|                                                               | -13.4          | G45[1.43], I46[1.44], C49[1.47], G50[1.48], G53[1.51], Y57[1.55], F81[2.51], L85[2.55], F89[2.59], F330[8.58]                                  |
|                                                               | -13.3          | I213[5.51], I216[5.54], F217[5.55], Y220[5.58], F221[5.59], V224[5.62], L271[6.45], S275[6.49], V279[6.53]                                     |
|                                                               | -12.8          | I131[3.48], Y134[3.51], I206[5.44], L207[5.45], L214[5.52], I215[5.53], F218[5.56], C219[5.57]                                                 |
| Sphingosine 1-phosphate receptor (S1P1) receptor              |                |                                                                                                                                                |
| Sphingosine 1-phosphate receptor (S1P1), inactive, Human 3v2y |                |                                                                                                                                                |
| 3v2y_EC                                                       | -13.0          | K41, S44[1.31], T48[1.35], V51[1.38], F52[1.39], I55[1.42], R292[7.34], Y295[7.37]                                                             |
|                                                               | -11.8          | F133[3.41], I170[4.52], I173[4.55], L174[4.56], L177[4.59], W182, F205[5.42], L213[5.50]                                                       |
| 3v2y_IC                                                       | -13.9          | L61[1.48], I64[1.51], F65[1.52], L68[1.55], I325[8.57], M326[8.58], G327[8.59], R328, L330                                                     |
|                                                               | -13.0          | L67[1.54], I70[1.57], W71[1.58], Y82[2.41], L89[2.48], F161[4.43], I164[4.46], S165[4.47], W168[4.50], V169[4.51], L172[4.54]                  |
|                                                               | -12.4          | I64[1.51], L67[1.54], I70[1.57], W71[1.58], Y82[2.41], L89[2.48], L92[2.51], L93[2.52], V96[2.55]                                              |
| Thrombin receptor 1 (PAR1)                                    |                |                                                                                                                                                |
| Thrombin receptor 1 (PAR1), inactive, Human 3vw7              |                |                                                                                                                                                |
| 3vw7_EC                                                       | -13.1          | F319[6.41], I323[6.45], I324[6.46], P328[6.50], F351[7.33], A352[7.34], L355[7.37], C356[7.38]                                                 |
|                                                               | -13.1          | T110[1.40], F113[1.43], V114[1.44], P118[1.48], P156[2.58], I159[2.61], S160[2.62], F170                                                       |
|                                                               | -13.0          | A228[4.51], L229[4.52], A232[4.55], P236[4.59], K240[4.63], L263, Y267[5.35], Y270[5.38]                                                       |
|                                                               | -12.7          | V149[2.51], L150[2.52], S153[2.55], V154[2.56], F157[2.59], E173[3.23], L174[3.24], F177[3.27]                                                 |
|                                                               | -12.7          | F280[5.48], L283[5.51], F319[6.41], I323[6.45], P328[6.50], V331[6.53], L332[6.54], A352[7.34]                                                 |
| 3vw7_IC                                                       | -13.5          | G111[1.41], V112[1.42], V115[1.45], L119[1.49], C365[7.47], P368[7.50], L369[7.51], Y372[7.54]                                                 |
|                                                               | -13.1          | V139[2.41], H143[2.45], L216[4.39], S220[4.43], C223[4.46], L224[4.47], W227[4.50], I231[4.54]                                                 |
|                                                               | -13.0          | Y140[2.42], L191[3.41], T194[3.44], V195[3.45], I198[3.48], T222[4.45], L229[4.52], F274[5.42], V277[5.45], F278[5.46], P282[5.50], I285[5.53] |
| Viral GPCR Receptor (US28)                                    |                |                                                                                                                                                |
| Viral GPCR Receptor (US28), inactive, with cholesterol, 4xt1  |                |                                                                                                                                                |
| 4xt1_EC                                                       | -14.4          | A77[2.48], L80[2.51], L81[2.52], C84[2.55], L88[2.59], S101[3.22], V102[3.23], P103[3.24]                                                      |
|                                                               | -13.3          | I238[6.45], I239[6.46], L242[6.49], P243[6.50], L246[6.53], T247[6.54], S268[7.30], L269[7.31], R271[7.33], A272[7.34]                         |
|                                                               | -12.6          | T105[3.26], L106[3.27], A109[3.30], V113[3.34], W152[4.50], V156[4.54], F163[4.61], M164[4.62]                                                 |
|                                                               | -12.5          | L37[1.36], F38[1.37], G41[1.40], V42[1.41], L45[1.44], F46[1.45], M90[2.61], L94[2.65]                                                         |



| PDB <sup>a</sup> | E <sup>b</sup> | Local Residues <sup>c</sup>                                                                                                        |
|------------------|----------------|------------------------------------------------------------------------------------------------------------------------------------|
| Run1.3           | -14.0          | I64, V70[2.41], I73[2.44], N74[2.45], A77[2.48], L81[2.52], C110[3.31], V113[3.34], C145[4.43], S148[4.46], I149[4.47], W152[4.50] |
| Run1.11          | -13.1          | T123[3.44], L127[3.48], Y131[3.52], W151[4.49], F154[4.52], I158[4.56], I199[5.49], V203[5.53]                                     |
| Run1.14          | -12.8          | M193[5.43], F197[5.47], V198[5.48], L201[5.51], S202[5.52], S205[5.55], Y206[5.56], Y209[5.59], L246[6.53], F249[6.56]             |

## Viral GPCR Receptor (US28), inactive, with cholesterol, 4xt3

|         |       |                                                                                                                        |
|---------|-------|------------------------------------------------------------------------------------------------------------------------|
| 4xt3_EC | -12.8 | I238[6.45], I239[6.46], L242[6.49], P243[6.50], L246[6.53], T247[6.54], V250[6.57], F265[7.27], L269[7.31], A272[7.34] |
|         | -12.5 | F154[4.52], I157[4.55], I158[4.56], I160[4.58], P161[4.59], V165, L180, Y184[5.34]                                     |
|         | -12.7 | I239[6.46], F240[6.47], S268[7.30], R271[7.33], A272[7.34], L275[7.37], T276[7.38], L279[7.41]                         |
|         | -11.9 | L37[1.36], F38[1.37], G41[1.40], V42[1.41], L45[1.44], F46[1.45], M90[2.61], L94[2.65]                                 |
|         | -12.5 | V35[1.34], F38[1.37], L39[1.38], V42[1.41], F46[1.45], R271[7.33], L275[7.37], L279[7.41], C282[7.44], L286[7.48]      |
| Run1.2  | -14.0 | I64, V70[2.41], I73[2.44], N74[2.45], A77[2.48], L81[2.52], C110[3.31], C145[4.43], S148[4.46], I149[4.47], W152[4.50] |
| Run1.11 | -13.3 | L127[3.48], Y131[3.52], F154[4.52], I158[4.56], E191[5.41], L194[5.44], I199[5.49], V203[5.53]                         |
| Run1.14 | -13.2 | L127[3.48], Y130[3.51], Y131[3.52], L194[5.44], V198[5.48], I199[5.49], S202[5.52], V203[5.53]                         |
| Run2.8  | -13.6 | E124[3.45], L127[3.48], R139, F147[4.45], F150[4.48], W151[4.49], F154[4.52], I157[4.55]                               |
| Run2.17 | -12.8 | L201[5.51], S205[5.55], Y208[5.58], Y209[5.59], S212[5.62], I231[6.38], V234[6.41], L235[6.42], I238[6.45]             |

## GPCR Class B

## Calcitonin receptor-like receptor

## Calcitonin receptor-like receptor, inactive, Human 6e3y

|         |       |                                                                                                                        |
|---------|-------|------------------------------------------------------------------------------------------------------------------------|
| 6e3y_EC | -13.5 | I123.E, I127.E[1.25], L131.E[1.29], H289, Y292[5.37], C299[5.44], A300[5.45], L303[5.48], V304[5.49], R355             |
|         | -12.8 | I146[1.44], I153[1.51], A154[1.52], L157[1.55], I192[2.65], I193[2.66], T196[2.69], A197[2.70]                         |
|         | -12.7 | F182[2.55], C186[2.59], V190[2.63], I193[2.66], S211[3.28], C212[3.29], V214[3.31], S215[3.32], I218[3.35], L222[3.39] |
|         | -12.7 | N140[1.38], Y143[1.41], L144[1.42], I147[1.45], L151[1.49], I371[7.44], F375[7.48], L378[7.51]                         |
|         | -12.3 | V210[3.27], K213[3.30], V214[3.31], F217[3.34], L264[4.54], C268[4.58], A271[4.61], W283                               |
| 6e3y_IC | -13.7 | R336[6.40], I340[6.44], I371[7.44], F375[7.48], L378[7.51], L379[7.52], T382[7.55], I383[7.56]                         |
|         | -13.6 | F164[1.62], N179[2.52], F182[2.55], F217[3.34], I218[3.35], Y221[3.38], Y256[4.46], W260[4.50], L264[4.54]             |
|         | -12.6 | L131.E[1.29], A135.E[1.33], V138.E[1.36], K142.E[1.40], L303[5.48], V304[5.49], F307[5.52], F308[5.53]                 |
|         | -12.8 | L157[1.55], L160[1.58], G161[1.59], I162[1.60], F164[1.62], Y165[1.63], F182[2.55], V185[2.58]                         |

## Corticotropin CRF1R

## Corticotropin CRF1R, inactive, Human 4k5y

|         |       |                                                                                                                                                      |
|---------|-------|------------------------------------------------------------------------------------------------------------------------------------------------------|
| 4k5y_EC | -13.2 | G186[3.27], R189[3.30], L190[3.31], A193[3.34], A194[3.35], Y197[3.38], F198[3.39], W236[4.50], F240[4.54], I243[4.57], A247[4.61], L251[4.65], W259 |
|         | -12.9 | F204[3.45], F207[3.48], I234[4.48], V238[4.52], I242[4.56], A245[4.59], I271[5.38], P275[5.42], L278[5.45], V279[5.46]                               |
| 4k5y_IC | -13.9 | N157[2.52], L164[2.59], A194[3.35], Y197[3.38], F198[3.39], I232[4.46], W236[4.50], F240[4.54]                                                       |
|         | -13.5 | F207[3.48], C211[3.52], T215[3.56], M230[4.44], F231[4.45], I234[4.48], L278[5.45], I282[5.49], F286[5.53]                                           |
|         | -12.3 | H214[3.55], V218[3.59], L278[5.45], L281[5.48], I282[5.49], I285[5.52], F286[5.53], N289[5.56]                                                       |
|         | -12.0 | L135[1.55], F138[1.58], V139[1.59], L142[1.62], L164[2.59], A167[2.62], T168[2.63], V171[2.66]                                                       |

## Corticotropin CRF1R, inactive, Human 4z9g

|         |       |                                                                                                                                          |
|---------|-------|------------------------------------------------------------------------------------------------------------------------------------------|
| 4z9g_EC | -13.5 | P321[6.47], I325[6.51], L329[6.55], E336, S340[7.34], V343[7.37], F344[7.38], F347[7.41]                                                 |
|         | -13.2 | F204[3.45], V238[4.52], I242[4.56], A245[4.59], Y253[4.67], I271[5.38], P275[5.42], L278[5.45]                                           |
| 4z9g_IC | -13.8 | F204[3.45], F207[3.48], C211[3.52], T215[3.56], R225, L226[4.40], I234[4.48], V238[4.52], I242[4.56], P275[5.42], L278[5.45], I282[5.49] |
|         | -13.5 | L142[1.62], I147, I153[2.48], N157[2.52], L164[2.59], Y197[3.38], I232[4.46], W236[4.50]                                                 |

| PDB <sup>a</sup>                                              | E <sup>b</sup> | Local Residues <sup>c</sup>                                                                                            |
|---------------------------------------------------------------|----------------|------------------------------------------------------------------------------------------------------------------------|
| Glucagon receptor                                             |                |                                                                                                                        |
| Glucagon receptor, inactive, Human 4l6r                       |                |                                                                                                                        |
| 4l6r_EC                                                       | -13.8          | I315[5.47], N318[5.50], F319[5.51], F322[5.54], I355[6.46], P356[6.47], V360[6.51], V363[6.54], F367[6.58], V368       |
|                                                               | -12.7          | F322[5.54], P356[6.47], L357[6.48], V360[6.51], H361[6.52], V364[6.55], K381[7.38], F384[7.41]                         |
|                                                               | -12.7          | M301[5.33], W304[5.36], W305[5.37], F309[5.41], F312[5.44], L313[5.45], L316[5.48], I317[5.49]                         |
|                                                               | -12.3          | Q142[1.40], V143[1.41], T146[1.44], S150[1.48], L153[1.51], L157[1.55], L192[2.65], D195[2.68], G196[2.69]             |
|                                                               | -12.2          | Q142[1.40], V143[1.41], T146[1.44], S150[1.48], L153[1.51], G154[1.52], L157[1.55], L192[2.65], D195[2.68]             |
|                                                               | -12.1          | A222[3.27], R225[3.30], V226[3.31], V229[3.34], Y233[3.38], M276[4.54], V280[4.58], V284[4.62], L288[4.66]             |
| 4l6r_IC                                                       | -12.6          | V147[1.45], L151[1.49], F391[7.48], L394[7.51], V398[7.55], F402[7.59], L403[7.60], Q408[8.51]                         |
|                                                               | -12.5          | K349[6.40], T353[6.44], L357[6.48], F387[7.44], L388[7.45], L395[7.52], L399[7.56], L403[7.60]                         |
|                                                               | -12.8          | F345[6.36], K349[6.40], L352[6.43], T353[6.44], P356[6.47], L357[6.48], V360[6.51], H361[6.52]                         |
| Glucagon receptor, inactive, Human 5ee7                       |                |                                                                                                                        |
| 5ee7_EC                                                       | -14.1          | Q142[1.40], T146[1.44], S150[1.48], L153[1.51], A154[1.52], L157[1.55], L192[2.65], D195[2.68], G196[2.69], T200[2.73] |
|                                                               | -13.5          | A222[3.27], R225[3.30], V226[3.31], V229[3.34], F230[3.35], Y233[3.38], A283[4.61], C287[4.65], W295                   |
|                                                               | -12.7          | I315[5.47], N318[5.50], F319[5.51], F322[5.54], I355[6.46], P356[6.47], V360[6.51], V363[6.54], V364[6.55], F367[6.58] |
| 5ee7_IC                                                       | -14.2          | L247[3.52], H250[3.55], L313[5.45], L316[5.48], I317[5.49], F320[5.52], I321[5.53], R324[5.56]                         |
|                                                               | -13.1          | L157[1.55], L160[1.58], A161[1.59], G164[1.62], G165[1.63], L182[2.55], V185[2.58], S189[2.62]                         |
| Glucagon receptor, inactive, Human 5xez                       |                |                                                                                                                        |
| 5xez_EC                                                       | -15.2          | T146[1.44], S150[1.48], L153[1.51], G154[1.52], L192[2.65], D195[2.68], G196[2.69], R199[2.72]                         |
|                                                               | -13.4          | R225[3.30], V226[3.31], V229[3.34], F230[3.35], M276[4.54], V280[4.58], A283[4.61], C287[4.65], N291, W295             |
|                                                               | -13.1          | W304[5.36], F312[5.44], L316[5.48], F320[5.52], V363[6.54], A366[6.57], F367[6.58], T369, D370                         |
|                                                               | -13.0          | T353[6.44], L357[6.48], V360[6.51], H361[6.52], V364[6.55], K381[7.38], F384[7.41], D385[7.42]                         |
|                                                               | -12.8          | V185[2.58], L186[2.59], V193[2.66], G219, A222[3.27], G223[3.28], V226[3.31], F230[3.35]                               |
| 5xez_IC                                                       | -14.4          | S265[4.43], L266[4.44], G269[4.47], G273[4.51], M276[4.54], L277[4.55], V280[4.58], P281[4.59], V284[4.62]             |
|                                                               | -12.8          | N179[2.52], L186[2.59], V229[3.34], F230[3.35], Y233[3.38], L268[4.46], W272[4.50], M276[4.54], V280[4.58]             |
|                                                               | -12.7          | L160[1.58], G164[1.62], A178[2.51], A182[2.55], V185[2.58], L186[2.59], S189[2.62], F230[3.35]                         |
| Glucagon receptor, inactive, Human 5xf1                       |                |                                                                                                                        |
| 5xf1_EC                                                       | -14.2          | T146[1.44], S150[1.48], L153[1.51], G154[1.52], L158[1.56], L192[2.65], G196[2.69], R199[2.72]                         |
|                                                               | -13.7          | L153[1.51], L157[1.55], L160[1.58], V185[2.58], S189[2.62], L192[2.65], V193[2.66], G196[2.69], L197[2.70], R199[2.72] |
|                                                               | -13.5          | V185[2.58], L186[2.59], S189[2.62], V193[2.66], L197[2.70], G219, G223[3.28], V226[3.31]                               |
|                                                               | -13.1          | T353[6.44], P356[6.47], L357[6.48], V360[6.51], H361[6.52], V364[6.55], K381[7.38], F384[7.41], D385[7.42]             |
|                                                               | -12.7          | R225[3.30], V226[3.31], V229[3.34], F230[3.35], M276[4.54], V280[4.58], A283[4.61], C287[4.65], W295                   |
| 5xf1_IC                                                       | -13.7          | S265[4.43], L268[4.46], G269[4.47], G273[4.51], M276[4.54], L277[4.55], V280[4.58], P281[4.59]                         |
|                                                               | -12.8          | L157[1.55], L160[1.58], G164[1.62], A178[2.51], A182[2.55], V185[2.58], L186[2.59], S189[2.62], F230[3.35]             |
|                                                               | -13.2          | N179[2.52], L186[2.59], V229[3.34], F230[3.35], Y233[3.38], L268[4.46], W272[4.50], M276[4.54]                         |
|                                                               | -13.0          | K349[6.40], S350[6.41], T353[6.44], L357[6.48], L399[7.56], L403[7.60], N404[8.47], K405[8.48]                         |
| Glucagon-like peptide receptor (GLP-1R)                       |                |                                                                                                                        |
| Glucagon-like peptide receptor (GLP-1R), inactive, Human 5vew |                |                                                                                                                        |
| 5vew_EC                                                       | -14.9          | Y145[1.40], T149[1.44], V150[1.45], A153[1.48], L154[1.49], S157[1.52], I161[1.56], F195[2.65], D198[2.68]             |
|                                                               | -12.8          | P358[6.47], L359[6.48], T362[6.51], H363[6.52], I366[6.55], F367[6.56], R380[7.35], K383[7.38], L384[7.39]             |
|                                                               | -12.8          | Q140[1.35], F143[1.38], L144[1.39], I147[1.42], I382[7.37], T386[7.41], S389[7.44], F393[7.48], L396[7.51], M397[7.52] |

| PDB <sup>a</sup>                                                                    | E <sup>b</sup> | Local Residues <sup>c</sup>                                                                                                                              |
|-------------------------------------------------------------------------------------|----------------|----------------------------------------------------------------------------------------------------------------------------------------------------------|
|                                                                                     | -12.7          | L224[3.27], L228[3.31], L231[3.34], Y235[3.38], L278[4.54], V282[4.58], I286[4.62], Y289[4.65]                                                           |
| 5vew_IC                                                                             | -13.5          | Y242[3.45], L245[3.48], I272[4.48], V276[4.52], L279[4.55], F280[4.56], I308[5.38], P312[5.42], F315[5.45]                                               |
|                                                                                     | -13.1          | L167[1.62], Y178[2.48], L181[2.51], N182[2.52], A185[2.55], L189[2.59], L192[2.62], F266[4.42], W274[4.50]                                               |
|                                                                                     | -13.1          | N182[2.52], L232[3.35], Y235[3.38], F266[4.42], V270[4.46], W274[4.50], L278[4.54], V282[4.58]                                                           |
| Glucagon-like peptide receptor (GLP-1R), inactive, Human 5vex                       |                |                                                                                                                                                          |
| 5vex_EC                                                                             | -14.0          | A153[1.48], F156[1.51], S157[1.52], V160[1.55], I161[1.56], F195[2.65], D198[2.68], A199[2.69]                                                           |
|                                                                                     | -13.1          | F143[1.38], L144[1.39], I147[1.42], T386[7.41], S389[7.44], F390[7.45], F393[7.48], L396[7.51], M397[7.52], I400[7.55]                                   |
|                                                                                     | -12.6          | L279[4.55], F280[4.56], P283[4.59], V287[4.63], Y291[4.67], Y305[5.35], I308[5.38], P312[5.42]                                                           |
| 5vex_IC                                                                             | -13.6          | Y242[3.45], L245[3.48], I272[4.48], V276[4.52], F280[4.56], I308[5.38], P312[5.42], F315[5.45]                                                           |
|                                                                                     | -13.6          | L231[3.34], L232[3.35], Y235[3.38], R267[4.43], V270[4.46], A271[4.47], W274[4.50], G275[4.51], L278[4.54]                                               |
|                                                                                     | -12.6          | F324[5.54], I328[5.58], K351[6.40], L354[6.43], T355[6.44], P358[6.47], L359[6.48], T362[6.51], I366[6.55]                                               |
| Glucagon-like peptide receptor (GLP-1R), active, Human 6b3j                         |                |                                                                                                                                                          |
| 6b3j_EC                                                                             | -14.7          | Y145[1.40], T149[1.44], A153[1.48], F156[1.51], S157[1.52], V160[1.55], F195[2.65], D198[2.68]                                                           |
|                                                                                     | -13.7          | F367[6.56], M371, T378[7.33], L379[7.34], I382[7.37], K383[7.38], T386[7.41], F390[7.45]                                                                 |
| 6b3j_IC                                                                             | -16.4          | L232[3.35], Y235[3.38], R267[4.43], V270[4.46], S271[4.47], W274[4.50], G275[4.51], L278[4.54]                                                           |
|                                                                                     | -13.2          | K351[6.40], L354[6.43], T355[6.44], P358[6.47], T386[7.41], S389[7.44], F390[7.45], M397[7.52], L401[7.56]                                               |
|                                                                                     | -12.6          | K346[6.35], L349[6.38], A350[6.39], T353[6.42], L354[6.43], I366[6.55], F367[6.56], M371, T386[7.41]                                                     |
|                                                                                     | -12.3          | L154[1.49], S157[1.52], A158[1.53], I161[1.56], L396[7.51], I400[7.55], C403[7.58], F404[7.59]                                                           |
| GPCR Class C                                                                        |                |                                                                                                                                                          |
| Metabotropic glutamate receptor (mGlu)                                              |                |                                                                                                                                                          |
| Metabotropic glutamate receptor mGlu1, inactive, dimer with cholesterol, Human 4or2 |                |                                                                                                                                                          |
| 4or2_EC                                                                             | -13.5          | L608.A[1.55], F639.A[2.47], W588.B, S589.B, I594.B[1.41], I597.B[1.44], A598.B[1.45], C601.B[1.48], L605.B[1.52]                                         |
|                                                                                     | -13.3          | W588.A, S589.A, I594.A[1.41], I597.A[1.44], A598.A[1.45], C601.A[1.48], L605.A[1.52], L608.B[1.55], F639.B[2.47]                                         |
|                                                                                     | -13.3          | L605.A[1.52], L608.B[1.55], F639.B[2.47], V643.B[2.51], F646.B[2.54], T647.B[2.55], T653.B, T655.B[3.27], S656.B[3.28], L659.B[3.31]                     |
|                                                                                     | -13.1          | T793.B[6.45], I796.B[6.48], I797.B[6.49], A800.B[6.52], I804.B[6.56], Y810.B[7.27], I813.B[7.30], T814.B[7.31], F817.B[7.34], L821.B[7.38]               |
|                                                                                     | -13.0          | W588.A, I597.A[1.44], C601.A[1.48], L605.A[1.52], F646.A[2.54], I604.B[1.51], L608.B[1.55], F639.B[2.47], F646.B[2.54]                                   |
|                                                                                     | -13.0          | T793.A[6.45], I796.A[6.48], I797.A[6.49], A800.A[6.52], I804.A[6.56], Y810.A[7.27], I813.A[7.30], T814.A[7.31], F817.A[7.34], L821.A[7.38]               |
|                                                                                     | -13.9          | W588.A, F639.A[2.47], L640.A[2.48], V643.A[2.51], F646.A[2.54], T647.A[2.55], A650.A, L659.A[3.31], L663.A[3.35]                                         |
|                                                                                     | -12.4          | L713.A[4.39], V716.A[4.42], L720.A[4.46], L751.A[5.38], V754.A[5.41], A755.A[5.42], G758.A[5.45], Y759.A[5.46], L762.A[5.49]                             |
| 4or2_IC                                                                             | -14.6          | V676.B[3.48], N680.B[3.52], R684.B[3.56], I709.B[4.35], L713.B[4.39], V716.B[4.42], Y759.B[5.46], L762.B[5.49], L763.B[5.50], S766.B[5.53], Y770.B[5.57] |
|                                                                                     | -13.1          | F599.A[1.46], F789.A[6.41], F817.A[7.34], L821.A[7.38], T824.A[7.41], V825.A[7.42], G828.A[7.45], C829.A[7.46], T832.A[7.49]                             |
|                                                                                     | -12.7          | Y786.B[6.38], T793.B[6.45], L821.B[7.38], V825.B[7.42], G828.B[7.45], C829.B[7.46], T832.B[7.49], P833.B[7.50]                                           |
|                                                                                     | -12.3          | E629.A[2.37], Y632.A[2.40], I633.A[2.41], A636.A[2.44], L640.A[2.48], L662.A[3.34], L663.A[3.35], L666.A[3.38], M670.A[3.42], W704.A[4.30], V707.A[4.33] |
|                                                                                     | -13.1          | T611.A[1.58], V615.A[1.62], Y632.A[2.40], A636.A[2.44], F639.A[2.47], L640.A[2.48], V643.A[2.51], L663.A[3.35]                                           |
|                                                                                     | -12.7          | V676.A[3.48], N680.A[3.52], R684.A[3.56], I709.A[4.35], L713.A[4.39], V716.A[4.42], Y759.A[5.46], L762.A[5.49]                                           |
|                                                                                     | -12.7          | F599.B[1.46], L602.B[1.49], V606.B[1.53], F609.B[1.56], T824.B[7.41], L827.B[7.44], G828.B[7.45], T832.B[7.49], M835.B[7.52], Y836.B[7.53], I839.B[7.56] |
|                                                                                     | -13.4          | L608.A[1.55], T611.A[1.58], L612.A[1.59], V615.A[1.62], F639.A[2.47], V643.A[2.51], L605.B[1.52], F609.B[1.56]                                           |
|                                                                                     | -12.3          | W704.B[4.30], V707.B[4.33], I708.B[4.34], S711.B[4.37], I712.B[4.38], S715.B[4.41], L718.B[4.44], T719.B[4.45], V722.B[4.48]                             |
| Metabotropic glutamate receptor mGlu1, inactive, Human 4oo9                         |                |                                                                                                                                                          |

| PDB <sup>a</sup>                                    | E <sup>b</sup>                                                                                             | Local Residues <sup>c</sup>                                                                                                                                |
|-----------------------------------------------------|------------------------------------------------------------------------------------------------------------|------------------------------------------------------------------------------------------------------------------------------------------------------------|
| 4oo9_EC                                             | -12.3                                                                                                      | L573, P578[1.38], I581[1.41], A582[1.42], V585[1.45], F586[1.46], L589[1.49], T811[7.41]                                                                   |
|                                                     | -12.1                                                                                                      | T780[6.45], I783[6.48], I784[6.49], I791[6.56], Y797[7.27], T801[7.31], F804[7.34], L808[7.38]                                                             |
|                                                     | -12.0                                                                                                      | I699[4.38], C702[4.41], I703[4.42], G706[4.45], V709[4.48], A710[4.49], I713[4.52], M714[4.53]                                                             |
|                                                     | -11.7                                                                                                      | I703[4.42], I707[4.46], L711[4.50], M714[4.53], L738[5.38], A742[5.42], Y746[5.46], L749[5.49]                                                             |
| 4oo9_IC                                             | -13.0                                                                                                      | V663[3.48], T664[3.49], Y667[3.52], I696[4.35], L700[4.39], Y746[5.46], L749[5.49], L750[5.50]                                                             |
|                                                     | -12.5                                                                                                      | F586[1.46], L589[1.49], A593[1.53], F596[1.56], V819[7.49], V822[7.52], Y823[7.53], L826[7.56]                                                             |
|                                                     | -12.5                                                                                                      | E616[2.37], Y619[2.40], I620[2.41], A623[2.44], L627[2.48], L653[3.38], M657[3.42], L694[4.33]                                                             |
|                                                     | -13.1                                                                                                      | F586[1.46], Y773[6.38], L808[7.38], T811[7.41], V812[7.42], G815[7.45], C816[7.46], V819[7.49], P820[7.50]                                                 |
| GPCR Class F                                        |                                                                                                            |                                                                                                                                                            |
| Class F Frizzled FZD4                               |                                                                                                            |                                                                                                                                                            |
| Class F Frizzled FZD4, inactive, Human 6bd4         |                                                                                                            |                                                                                                                                                            |
| 6bd4_EC                                             | -12.8                                                                                                      | I318[3.41], I354[4.52], K358[4.56], V361[4.59], M365[4.63], G389[5.45], F390[5.46], P394[5.50], Y398[5.54], I401[5.57]                                     |
|                                                     | -12.6                                                                                                      | F218[1.31], W222[1.35], M474[7.35], A475[7.36], M478[7.39], L479[7.40], F482[7.43], M483[7.44]                                                             |
| 6bd4_IC                                             | -13.7                                                                                                      | I318[3.41], V321[3.44], I322[3.45], L325[3.48], H343[4.41], Y346[4.44], F347[4.45], A350[4.48], I354[4.52], P394[5.50], T397[5.53], Y398[5.54], I401[5.57] |
|                                                     | -13.1                                                                                                      | L443[6.39], V446[6.42], I450[6.46], M483[7.44], L486[7.47], M493[7.54], W494[7.55], W496[7.57]                                                             |
|                                                     | -12.9                                                                                                      | F241[1.54], F257[2.46], M260[2.49], F311[3.34], F312[3.35], H348[4.46], W352[4.50], A356[4.54]                                                             |
| Class F Smoothened SMO                              |                                                                                                            |                                                                                                                                                            |
| Class F Smoothened SMO, inactive, dimer, Human 4jkv |                                                                                                            |                                                                                                                                                            |
| 4jkv_EC                                             | -14.0                                                                                                      | D229.B[1.31], S232.B[1.34], Y233.B[1.35], A236.B[1.38], F237.B[1.39], V240.B[1.42], K519.B[7.39], I530.B[7.50]                                             |
|                                                     | -13.2                                                                                                      | L246[1.48], F275[2.52], I279[2.56], A283[2.60], M286, E292, S313[3.24], I316[3.27], I320[3.31]                                                             |
|                                                     | -12.8                                                                                                      | A377[4.62], L405.B[5.48], A406.B[5.49], G409.B[5.52], I413.B[5.56], F467.B[6.48], F471.B[6.52], F474.B[6.55]                                               |
|                                                     | -12.8                                                                                                      | I413[5.56], G416[5.59], Y417[5.60], I420[5.63], F460[6.41], L464[6.45], F467[6.48], S468[6.49], F471[6.52]                                                 |
|                                                     | -12.5                                                                                                      | A406[5.49], G409[5.52], L410[5.53], I413[5.56], V414[5.57], F467[6.48], F471[6.52], F474[6.55], F369.B[4.54]                                               |
|                                                     | -12.4                                                                                                      | P306.B, L312.B[3.23], V315.B[3.26], I316.B[3.27], V319.B[3.30], W365.B[4.50], F369.B[4.54], L376.B[4.61]                                                   |
|                                                     | -12.3                                                                                                      | Y233[1.35], A236[1.38], F237[1.39], V240[1.42], F523[7.43], I530[7.50], T534[7.54], W537[7.57]                                                             |
| 4jkv_IC                                             | -14.9                                                                                                      | R451.B[6.32], I454.B[6.35], F455.B[6.36], L458.B[6.39], F462.B[6.43], F523.B[7.43], T534.B[7.54], W537.B[7.57]                                             |
|                                                     | -13.9                                                                                                      | L410[5.53], I413[5.56], W256.B, N260.B, Y269.B[2.46], T357.B[4.42], S358.B[4.43], Y359.B[4.44], H361.B[4.46], L362.B[4.47], F369.B[4.54]                   |
|                                                     | -13.9                                                                                                      | V253[1.55], W256, F268[2.45], Y269[2.46], A272[2.49], V276[2.53], V319[3.30], I320[3.31], Y323[3.34]                                                       |
|                                                     | -13.9                                                                                                      | Y323[3.34], Y359[4.44], H361[4.46], L362[4.47], W365[4.50], F369[4.54], Y337.B[3.48], H340.B[3.51], Y417.B[5.60], F418.B[5.61], R421.B[5.64]               |
|                                                     | -13.5                                                                                                      | F237[1.39], E447[6.28], R451[6.32], I454[6.35], F455[6.36], L458[6.39], F523[7.43], I530[7.50], A531[7.51], T534[7.54], W537[7.57]                         |
|                                                     | -12.9                                                                                                      | A239.B[1.41], V240.B[1.42], L243.B[1.45], C244.B[1.46], F247.B[1.49], W537.B[7.57], T538.B[8.47], L542.B[8.51]                                             |
| -12.7                                               | W339[3.50], L426[5.69], L450[6.31], I454[6.35], F457[6.38], L458[6.39], G461[6.42], L464[6.45], I465[6.46] |                                                                                                                                                            |
| Class F Smoothened SMO, inactive, Human 4n4w        |                                                                                                            |                                                                                                                                                            |
| 4n4w_EC                                             | -13.5                                                                                                      | I413[5.56], G416[5.59], I420[5.63], F460[6.41], L464[6.45], F467[6.48], S468[6.49], F471[6.52], F475[6.56]                                                 |
|                                                     | -13.3                                                                                                      | L246[1.48], F275[2.52], I279[2.56], L282[2.59], A283[2.60], F285[2.62], M286, D287                                                                         |
|                                                     | -13.0                                                                                                      | L246[1.48], F275[2.52], I279[2.56], M286, E292, S313[3.24], I316[3.27], I317[3.28], I320[3.31]                                                             |
|                                                     | -12.6                                                                                                      | L367[4.52], L371[4.56], R398[5.41], Y399[5.42], G402[5.45], F403[5.46], A406[5.49], L410[5.53]                                                             |
| 4n4w_IC                                             | -14.1                                                                                                      | V319[3.30], Y323[3.34], S358[4.43], H361[4.46], L362[4.47], W365[4.50], S366[4.51], F369[4.54]                                                             |
|                                                     | -13.4                                                                                                      | V330[3.41], V333[3.44], V334[3.45], Y337[3.48], F360[4.45], L363[4.48], L367[4.52], L371[4.56], P407[5.50], L410[5.53], V414[5.57], F418[5.61]             |
|                                                     | -12.8                                                                                                      | W256, F268[2.45], Y269[2.46], V276[2.53], V319[3.30], I320[3.31], Y323[3.34], H361[4.46], W365[4.50]                                                       |

| PDB <sup>a</sup>                             | E <sup>b</sup> | Local Residues <sup>c</sup>                                                                                                        |
|----------------------------------------------|----------------|------------------------------------------------------------------------------------------------------------------------------------|
| Class F Smoothened SMO, inactive, Human 4o9r |                |                                                                                                                                    |
| 4o9r_EC                                      | -13.5          | L246[1.48], F275[2.52], I279[2.56], L282[2.59], A283[2.60], F285[2.62], M286, D287                                                 |
|                                              | -12.9          | F275[2.52], V276[2.53], I279[2.56], E292, S313[3.24], I316[3.27], I317[3.28], I320[3.31]                                           |
|                                              | -12.8          | L412[5.55], I413[5.56], F460[6.41], L464[6.45], F467[6.48], S468[6.49], F471[6.52], Y472[6.53], F475[6.56], N476[6.57]             |
|                                              | -12.7          | F460[6.41], G461[6.42], L464[6.45], I465[6.46], S468[6.49], Y472[6.53], V517[7.37], I520[7.40]                                     |
| 4o9r_IC                                      | -14.2          | F237[1.39], R451[6.32], I454[6.35], F455[6.36], L458[6.39], F523[7.43], I530[7.50], A531[7.51], T534[7.54], W537[7.57]             |
| Class F Smoothened SMO, inactive, Human 4qim |                |                                                                                                                                    |
| 4qim_EC                                      | -12.7          | I413[5.56], Y417[5.60], I420[5.63], F460[6.41], L464[6.45], F467[6.48], S468[6.49], F471[6.52]                                     |
| 4qim_IC                                      | -14.3          | V240[1.42], L243[1.45], F247[1.49], V536[7.56], W537[7.57], T538[8.47], K539[8.48], T541[8.50], L542[8.51]                         |
|                                              | -13.1          | L450[6.31], R451[6.32], I454[6.35], F455[6.36], L458[6.39], F523[7.43], G527[7.47], I530[7.50], A531[7.51], T534[7.54], W537[7.57] |
|                                              | -13.1          | V319[3.30], Y323[3.34], H361[4.46], L362[4.47], W365[4.50], S366[4.51], F369[4.54], T372[4.57]                                     |
|                                              | -12.8          | W256, F268[2.45], Y269[2.46], A272[2.49], V276[2.53], I279[2.56], I320[3.31], W365[4.50]                                           |
| Class F Smoothened SMO, inactive, Human 4qin |                |                                                                                                                                    |
| 4qin_EC                                      | -14.1          | F237[1.39], R451[6.32], I454[6.35], F455[6.36], L458[6.39], F523[7.43], I530[7.50], A531[7.51], T534[7.54], W537[7.57]             |
|                                              | -13.4          | V319[3.30], Y323[3.34], S358[4.43], H361[4.46], L362[4.47], W365[4.50], F369[4.54], T372[4.57], V373[4.58]                         |
|                                              | -12.9          | L412[5.55], I413[5.56], G416[5.59], Y417[5.60], I420[5.63], R421[5.64], M424[5.67], L464[6.45], F467[6.48]                         |
|                                              | -12.7          | V333[3.44], Y337[3.48], F360[4.45], L363[4.48], L367[4.52], A406[5.49], L410[5.53], V414[5.57], F418[5.61]                         |
| 4qin_IC                                      | -13.0          | P306, L312[3.23], V315[3.26], I316[3.27], V319[3.30], Y323[3.34], W365[4.50], F369[4.54], T372[4.57], V373[4.58], L376[4.61]       |
|                                              | -12.8          | L246[1.48], F275[2.52], I279[2.56], A283[2.60], M286, L312[3.23], S313[3.24], I316[3.27], I317[3.28]                               |
|                                              | -12.7          | S366[4.51], L367[4.52], V370[4.55], L371[4.56], A374[4.59], V378[4.63], Y399[5.42], G402[5.45], F403[5.46]                         |
|                                              | -12.5          | L412[5.55], I413[5.56], G416[5.59], F460[6.41], L464[6.45], F467[6.48], S468[6.49], F471[6.52]                                     |
|                                              | -12.1          | A401[5.44], L405[5.48], A406[5.49], G409[5.52], L412[5.55], I413[5.56], F467[6.48], F471[6.52], F474[6.55], F475[6.56]             |
|                                              | 13.2           | A239[1.41], L243[1.45], L246[1.48], F247[1.49], L282[2.59], F285[2.62], M286, D287                                                 |
| Class F Smoothened SMO, inactive, Human 5I7d |                |                                                                                                                                    |
| 5I7d_EC                                      | -14.1          | F275[2.52], I279[2.56], T311, L312[3.23], S313[3.24], I316[3.27], I317[3.28], I320[3.31]                                           |
|                                              | -12.5          | L367[4.52], L371[4.56], R398[5.41], Y399[5.42], A401[5.44], G402[5.45], F403[5.46], A406[5.49]                                     |
|                                              | -12.5          | D229[1.31], S232[1.34], Y233[1.35], A236[1.38], F237[1.39], V240[1.42], K519[7.39], I530[7.50], W537[7.57]                         |
|                                              | -12.5          | L412[5.55], I413[5.56], L464[6.45], F467[6.48], S468[6.49], F471[6.52], Y472[6.53], N476[6.57]                                     |
| Class F Smoothened SMO, inactive, Human 5I7i |                |                                                                                                                                    |
| 5I7i_EC                                      | -13.5          | F275[2.52], I279[2.56], M286, E292, S313[3.24], I316[3.27], I317[3.28], I320[3.31]                                                 |
| 5I7i_IC                                      | -15.3          | V240[1.42], L243[1.45], F247[1.49], V536[7.56], W537[7.57], T538[8.47], K539[8.48], T541[8.50], L542[8.51]                         |
|                                              | -14.4          | F237[1.39], R451[6.32], F455[6.36], L458[6.39], F462[6.43], F523[7.43], G527[7.47], I530[7.50], A531[7.51], T534[7.54], W537[7.57] |
|                                              | -13.8          | V319[3.30], Y323[3.34], S358[4.43], H361[4.46], L362[4.47], W365[4.50], S366[4.51], F369[4.54]                                     |
|                                              | -13.1          | V253[1.55], W256, F268[2.45], Y269[2.46], V276[2.53], V319[3.30], I320[3.31], Y323[3.34]                                           |
|                                              | -12.6          | V330[3.41], V333[3.44], Y337[3.48], F360[4.45], L363[4.48], L367[4.52], L410[5.53], V414[5.57], F418[5.61]                         |
| Class F Smoothened SMO, Active, Xenopus 6d32 |                |                                                                                                                                    |
| 6d32_EC                                      | -13.8          | I215[1.44], F219[1.48], F248[2.52], I252[2.56], L255[2.59], A256[2.60], F258, M259                                                 |
|                                              | -12.8          | L385[5.55], I386[5.56], L437[6.45], F440[6.48], G441[6.49], F444[6.52], Y445[6.53], F448[6.56]                                     |

| PDB <sup>a</sup> | E <sup>b</sup> | Local Residues <sup>c</sup>                                                                                            |
|------------------|----------------|------------------------------------------------------------------------------------------------------------------------|
|                  | -12.4          | I340[4.52], L344[4.56], H371[5.41], Y372[5.42], G375[5.45], F376[5.46], A379[5.49], L383[5.53]                         |
|                  | -12.3          | I205[1.34], I209[1.38], S212[1.41], V213[1.42], F216[1.45], C217[1.46], F220[1.49], W510[7.57]                         |
|                  | -12.4          | F248[2.52], A249[2.53], I252[2.56], A256[2.60], M259, A262, E265, I266, I289[3.27], I290[3.28], I293[3.31]             |
|                  | -12.3          | Y206[1.35], I209[1.38], F210[1.39], V213[1.42], K492[7.39], F496[7.43], I503[7.50], T507[7.54]                         |
| 6d32_IC          | -12.7          | L385[5.55], I386[5.56], G389[5.59], Y390[5.60], I393[5.63], F433[6.41], V436[6.44], L437[6.45], F440[6.48]             |
|                  | -12.6          | I292[3.30], Y296[3.34], H334[4.46], L335[4.47], W338[4.50], F342[4.54], T345[4.57], V346[4.58]                         |
|                  | -12.5          | R424[6.32], I427[6.35], L431[6.39], F435[6.43], F496[7.43], S504[7.51], T507[7.54], W508[7.55], W510[7.57], T511[8.47] |
|                  | -12.5          | I303[3.41], V306[3.44], M307[3.45], I336[4.48], I340[4.52], L344[4.56], G375[5.45], F376[5.46], P380[5.50], L383[5.53] |
|                  | -13.0          | W229, F241[2.45], Y242[2.46], A245[2.49], A249[2.53], I252[2.56], I293[3.31], H334[4.46]                               |

## Class F Smoothened SMO, Active, Xenopus 6d35

|         |       |                                                                                                            |
|---------|-------|------------------------------------------------------------------------------------------------------------|
| 6d35_EC | -13.1 | F248[2.52], I252[2.56], A256[2.60], M259, E265, S286[3.24], I289[3.27], I290[3.28], I293[3.31]             |
|         | -12.9 | L385[5.55], I386[5.56], L437[6.45], F440[6.48], G441[6.49], F444[6.52], Y445[6.53], F448[6.56]             |
|         | -12.7 | I340[4.52], L344[4.56], H371[5.41], Y372[5.42], G375[5.45], F376[5.46], A379[5.49], L383[5.53]             |
|         | -12.5 | E202[1.31], Y206[1.35], I209[1.38], F210[1.39], V213[1.42], K492[7.39], F496[7.43], I503[7.50], T507[7.54] |
|         | -12.6 | I205[1.34], A208[1.37], I209[1.38], S212[1.41], V213[1.42], F216[1.45], F258, W510[7.57]                   |
| 6d35_IC | -13.2 | R424[6.32], I427[6.35], L431[6.39], F496[7.43], S504[7.51], T507[7.54], W508[7.55], T511[8.47]             |
|         | -12.9 | L423[6.31], G426[6.34], I427[6.35], F430[6.38], L431[6.39], F435[6.43], I438[6.46], F496[7.43]             |
|         | -12.4 | N233, F241[2.45], Y242[2.46], A245[2.49], A249[2.53], I252[2.56], I293[3.31], H334[4.46]                   |
|         | -13.2 | A249[2.53], I292[3.30], I293[3.31], Y296[3.34], S331[4.43], H334[4.46], L335[4.47], W338[4.50]             |
|         | -12.6 | I303[3.41], V306[3.44], M307[3.45], F333[4.45], I336[4.48], I340[4.52], L344[4.56], G375[5.45], L383[5.53] |
|         | -12.5 | L385[5.55], I386[5.56], G389[5.59], Y390[5.60], I393[5.63], F433[6.41], V436[6.44], L437[6.45], F440[6.48] |

## Adiponectin Receptors

## GPCR Adiponectin Receptor

## Adiponectin Receptor, inactive, Human 3wxv

|         |       |                                                                                 |
|---------|-------|---------------------------------------------------------------------------------|
| 3wxv_EC | -13.7 | L276[5], V279[5], T282[5], T286[5], F291, A294, T295, M300[6], G301[6], F304[6] |
|         | -12.9 | F145[1], L149[1], I153[1], M156[1], G174[2], L178[2], V181[2], L182[2], S185[2] |
|         | -12.8 | W302[6], I339[7], V342[7], L343[7], A346[7], F349[7], V350[7], Y353[7]          |
| 3wxv_IC | -14.9 | Q265[5], T266[5], G269[5], V270[5], G273[5], L276[5], S277[5], V279[5], V280[5] |
|         | -13.4 | Q265[5], L272[5], L276[5], V279[5], I311[6], G315[6], A318[6], A319[6]          |
|         | -12.5 | F304[6], A307[6], V308[6], I311[6], T312[6], L316[6], I321, F325                |
|         | -12.5 | R122, F125, K126, I128, F129, F145[1], V146[1], L149[1]                         |

| PDB <sup>a</sup>                           | E <sup>b</sup> | Local Residues <sup>c</sup>                                                                                                           |
|--------------------------------------------|----------------|---------------------------------------------------------------------------------------------------------------------------------------|
| Adiponectin Receptor, inactive, Human 5lwy |                |                                                                                                                                       |
| 5lwy_EC                                    | -13.2          | Q179[2], V183[2], L186[2], L225[3], M228, V232[4], L250[4], I258, I261                                                                |
|                                            | -13.1          | L316[6], L320, L350[7], I353[7], F354[7], A357[7], F360, V361, H364                                                                   |
|                                            | -11.5          | Q244[4], P245[4], I248[4], Y249[4], V252[4], L256[4], I291, H295                                                                      |
| 5lwy_IC                                    | -13.1          | G276[5], V277[5], G280[5], V281[5], G284[5], S288, I290, I291                                                                         |
|                                            | -12.8          | R213[3], L214[3], K217[3], L218[3], S221[3], L225[3], I261, Q265[5]                                                                   |
| Adiponectin Receptor, inactive, Human 5lx9 |                |                                                                                                                                       |
| 5lx9_EC                                    | -13.1          | L160, M167, L178[2], K181[2], V182[2], G185[2], F188[2], L189[2], I192[2], S196                                                       |
|                                            | -12.2          | V183[2], L186[2], L225[3], M228, V232[4], L250[4], C254[4], I258, I261                                                                |
|                                            | -12.5          | L316[6], L320, L350[7], I353[7], F354[7], A357[7], F360, V361, H364                                                                   |
| 5lx9_IC                                    | -13.5          | I139[1], F140[1], R141[1], I142[1], T146[1], W150[1], L154[1], W344[7]                                                                |
|                                            | -13.1          | L256[4], G276[5], V277[5], G280[5], V281[5], G284[5], S288, I291                                                                      |
|                                            | -13.1          | G276[5], A279[5], G280[5], L283[5], G284[5], L287[5], I290, A329                                                                      |
|                                            | -12.2          | L214[3], K217[3], L218[3], S221[3], L225[3], M228, I261, Q265[5]                                                                      |
|                                            | -12.0          | V252[4], V255[4], L256[4], A259, V263[5], W266[5], V277[5], V281[5]                                                                   |
| Adiponectin Receptor, inactive, Human 5lxa |                |                                                                                                                                       |
| 5lxa_EC                                    | -12.9          | L316[6], L320, L350[7], I353[7], F354[7], A357[7], F360, V361, H364                                                                   |
|                                            | -12.7          | Q179[2], V182[2], V183[2], Y236[4], F247[4], L250[4], I251[4], C254[4], V255[4], I258                                                 |
| 5lxa_IC                                    | -12.9          | L189[2], L193[2], L214[3], K217[3], L218[3], S221[3], L225[3], I261, Q265[5]                                                          |
|                                            | -12.0          | V252[4], L256[4], V277[5], G280[5], V281[5], G284[5], S288, I291                                                                      |
| Adiponectin Receptor, inactive, Human 5lxg |                |                                                                                                                                       |
| 5lxg_EC                                    | -14.4          | Q168, V171[2], V172[2], M175[2], V221[3], Y225[3], L239[4], S240[4], C243[4], V244[4], I247[4]                                        |
|                                            | -13.6          | V279[5], T282[5], M283[5], T286[5], G290, F291, A294, T295, M300[6], G301[6], F304[6], A307[6], I311[6]                               |
|                                            | -12.7          | W302[6], I339[7], V342[7], L343[7], A346[7], F349[7], V350[7], Y353[7]                                                                |
| 5lxg_IC                                    | -12.8          | Y209[3], I212[3], I216[3], F220[3], F271[5], L274[5], G275[5], G278[5], F303[6], A307[6], Y310[6], I311[6], A314[6], Y317[6], F340[7] |
|                                            | -12.7          | M175[2], L178[2], L214[3], M217[3], G218[3], V221[3], I247[4], I250[4], I251[4], Q254[4], D256[4], R257                               |
|                                            | -12.2          | F271[5], L272[5], G275[5], L276[5], G278[5], V279[5], T282[5], A307[6], I311[6]                                                       |
|                                            | -12.3          | F145[1], L149[1], I153[1], L178[2], V181[2], L182[2], S185[2], F186[2], L189[2], F204[3]                                              |

a. EC and IC refer to the extracellular and intracellular sides of the membrane respectively.

b. Docking energies in kcal mol<sup>-1</sup>.

c. Square brackets give systematic residue numbers from the GPCR database (<http://gpcrdb.org>), or, where these are not available, the TM helix number.
